# Supplementary material
Source: Research Square preprint supplement (doi:10.21203/rs.3.rs-9404926/v1)
Supplement: Supplementary file 1 [file 5b5c0802b32bd97bc27b44ad.xlsx]

## Sheet: Sheet1
Deg_RNAseq
ID	Symbol	ExpMean	Exp Samples A	Exp Samples B	log2FC	lfcSE	Stat	p-value	padj
ENSG00000166317.11	SYNPO2L	17.895	49.619	2.033	-4.061	0.531	-12.643	1.2e-36	3.3e-32
ENSG00000170681.6	CAVIN4	33.31	95.805	2.063	-4.982	0.533	-12.582	2.6e-36	3.6e-32
ENSG00000160678.11	S100A1	377.802	1093.84	19.786	-5.719	0.524	-12.22	2.4e-34	1.9e-30
ENSG00000177238.13	TRIM72	14.363	41.499	0.795	-4.565	0.518	-12.207	2.9e-34	1.9e-30
ENSG00000072954.6	TMEM38A	56.738	155.834	7.19	-4.259	0.499	-12.165	4.8e-34	2.6e-30
ENSG00000272414.5	FAM47E-STBD1	16.628	48.441	0.721	-4.845	0.593	-12.116	8.7e-34	3.9e-30
ENSG00000092051.16	JPH4	40.204	0.065	60.274	5.846	0.729	11.709	1.2e-31	4.1e-28
ENSG00000163395.16	IGFN1	16.376	44.405	2.361	-3.756	0.483	-11.697	1.3e-31	4.1e-28
ENSG00000165887.11	ANKRD2	162.938	471.353	8.731	-5.601	0.599	-11.694	1.4e-31	4.1e-28
ENSG00000145824.12	CXCL14	35.209	102.312	1.657	-5.281	0.622	-11.466	2.0e-30	5.0e-27
ENSG00000112655.15	PTK7	44.795	0.421	66.983	5.58	0.527	11.462	2.1e-30	5.0e-27
ENSG00000104848.1	KCNA7	5.014	14.222	0.41	-3.432	0.547	-11.454	2.2e-30	5.1e-27
ENSG00000153531.13	ADPRHL1	27.585	78.649	2.054	-4.705	0.606	-11.437	2.7e-30	5.7e-27
ENSG00000070808.15	CAMK2A	20.377	59.024	1.054	-4.869	0.618	-11.357	6.8e-30	1.3e-26
ENSG00000124743.5	KLHL31	15.421	42.281	1.991	-3.855	0.492	-11.316	1.1e-29	2.0e-26
ENSG00000078295.16	ADCY2	12.716	32.967	2.591	-3.242	0.502	-11.308	1.2e-29	2.0e-26
ENSG00000154153.13	RETREG1	15.701	45.435	0.834	-4.662	0.675	-11.228	3.0e-29	4.7e-26
ENSG00000140986.7	RPL3L	97.754	286.807	3.228	-6.089	0.688	-11.223	3.1e-29	4.7e-26
ENSG00000117115.12	PADI2	23.471	68.926	0.743	-5.326	0.691	-11.211	3.6e-29	5.1e-26
ENSG00000118971.7	CCND2	107.917	1.181	161.285	6.217	0.504	11.194	4.4e-29	5.9e-26
ENSG00000177752.14	YIPF7	19.556	56.729	0.969	-4.873	0.628	-11.181	5.0e-29	6.5e-26
ENSG00000185437.13	SH3BGR	163.172	470.085	9.716	-5.458	0.646	-11.15	7.1e-29	8.7e-26
ENSG00000064205.10	WISP2	11.598	32.859	0.968	-4.105	0.54	-11.061	1.9e-28	2.3e-25
ENSG00000163995.19	ABLIM2	23.924	67.878	1.947	-4.547	0.573	-11.022	3.0e-28	3.4e-25
ENSG00000146054.17	TRIM7	36.984	106.772	2.09	-5.124	0.584	-11.012	3.3e-28	3.6e-25
ENSG00000087085.14	ACHE	22.545	64.608	1.514	-4.706	0.596	-10.993	4.2e-28	4.3e-25
ENSG00000205678.7	TECRL	18.327	52.231	1.375	-4.486	0.566	-10.979	4.8e-28	4.8e-25
ENSG00000137571.10	SLCO5A1	2.157	5.294	0.589	-1.986	0.505	-10.96	5.9e-28	5.7e-25
ENSG00000167476.10	JSRP1	77.199	216.367	7.616	-4.657	0.587	-10.838	2.3e-27	2.1e-24
ENSG00000129910.7	CDH15	5.71	16.623	0.253	-3.814	0.731	-10.83	2.5e-27	2.2e-24
ENSG00000112276.13	BVES	6.668	18.517	0.744	-3.485	0.541	-10.746	6.2e-27	5.4e-24
ENSG00000188517.15	COL25A1	19.616	0.133	29.358	4.744	0.599	10.707	9.5e-27	7.9e-24
ENSG00000107317.12	PTGDS	73.727	201.713	9.735	-4.239	0.559	-10.705	9.6e-27	7.9e-24
ENSG00000082684.14	SEMA5B	64.362	0.404	96.341	6.115	0.645	10.698	1.0e-26	8.2e-24
ENSG00000196218.12	RYR1	97.491	249.59	21.442	-3.481	0.561	-10.694	1.1e-26	8.4e-24
ENSG00000163827.12	LRRC2	15.798	44.254	1.57	-4.138	0.566	-10.662	1.5e-26	1.2e-23
ENSG00000058056.8	USP13	20.788	53.804	4.28	-3.376	0.469	-10.604	2.9e-26	2.1e-23
ENSG00000167676.4	PLIN4	27.584	80.423	1.165	-5.233	0.687	-10.6	3.0e-26	2.1e-23
ENSG00000144908.13	ALDH1L1	13.963	39.624	1.133	-4.251	0.651	-10.521	6.9e-26	4.8e-23
ENSG00000182759.3	MAFA	5.466	15.791	0.304	-3.687	0.672	-10.51	7.7e-26	5.2e-23
ENSG00000162494.5	LRRC38	7.047	20.592	0.275	-4.082	0.706	-10.462	1.3e-25	8.4e-23
ENSG00000165996.13	HACD1	14.013	38.562	1.739	-3.852	0.564	-10.46	1.3e-25	8.4e-23
ENSG00000182272.11	B4GALNT4	186.56	0.196	279.742	7.875	0.953	10.459	1.3e-25	8.4e-23
ENSG00000228672.3	PROB1	6.258	17.764	0.506	-3.64	0.606	-10.43	1.8e-25	1.1e-22
ENSG00000107537.13	PHYH	83.601	218.857	15.973	-3.695	0.486	-10.393	2.7e-25	1.6e-22
ENSG00000019991.16	HGF	109.313	0.405	163.767	6.874	0.666	10.388	2.8e-25	1.7e-22
ENSG00000158571.10	PFKFB1	15.663	42.335	2.327	-3.703	0.54	-10.361	3.7e-25	2.2e-22
ENSG00000145934.16	TENM2	25.748	0.032	38.605	5.262	0.798	10.341	4.6e-25	2.6e-22
ENSG00000127252.5	HRASLS	9.911	27.936	0.899	-3.93	0.63	-10.323	5.5e-25	3.1e-22
ENSG00000162688.16	AGL	35.535	94.421	6.092	-3.75	0.501	-10.298	7.2e-25	3.8e-22
ENSG00000140416.20	TPM1	1419.07	4045.78	105.71	-5.245	0.575	-10.297	7.2e-25	3.8e-22
ENSG00000198729.4	PPP1R14C	9.86	28.518	0.531	-4.269	0.674	-10.296	7.3e-25	3.8e-22
ENSG00000138829.11	FBN2	15.478	0.024	23.205	4.564	1.003	10.289	7.9e-25	4.0e-22
ENSG00000178104.19	PDE4DIP	727.703	2011.39	85.857	-4.534	0.533	-10.257	1.1e-24	5.5e-22
ENSG00000089250.18	NOS1	2.531	7.083	0.255	-2.687	0.577	-10.244	1.3e-24	6.2e-22
ENSG00000123240.16	OPTN	113.689	302.219	19.424	-3.892	0.544	-10.231	1.4e-24	6.9e-22
ENSG00000117479.13	SLC19A2	22.999	58.422	5.288	-3.24	0.464	-10.195	2.1e-24	9.9e-22
ENSG00000187486.5	KCNJ11	11.317	32.954	0.498	-4.502	0.714	-10.16	3.0e-24	1.4e-21
ENSG00000105357.16	MYH14	9.373	22.255	2.932	-2.564	0.544	-10.146	3.5e-24	1.6e-21
ENSG00000185105.5	MYADML2	14.674	42.47	0.776	-4.613	0.691	-10.12	4.5e-24	2.0e-21
ENSG00000134020.7	PEBP4	116.301	335.268	6.817	-5.427	0.674	-10.091	6.0e-24	2.7e-21
ENSG00000196616.13	ADH1B	24.808	71.558	1.433	-4.899	0.643	-10.021	1.2e-23	5.4e-21
ENSG00000088882.7	CPXM1	196.703	0.559	294.775	7.568	0.779	10.017	1.3e-23	5.5e-21
ENSG00000168427.8	KLHL30	8.883	26.145	0.252	-4.439	0.784	-9.995	1.6e-23	6.8e-21
ENSG00000183571.10	PGPEP1L	8.525	24.618	0.478	-4.115	0.679	-9.984	1.8e-23	7.5e-21
ENSG00000112559.13	MDFI	71.381	1.161	106.491	5.637	0.576	9.982	1.8e-23	7.5e-21
ENSG00000133110.14	POSTN	528.735	3.741	791.233	7.385	0.652	9.937	2.9e-23	1.2e-20
ENSG00000076604.14	TRAF4	89.327	0.778	133.602	6.243	0.657	9.931	3.1e-23	1.2e-20
ENSG00000127241.16	MASP1	7.896	22.787	0.451	-4.035	0.706	-9.916	3.5e-23	1.4e-20
ENSG00000151320.10	AKAP6	7.226	18.342	1.668	-2.858	0.559	-9.87	5.6e-23	2.2e-20
ENSG00000128591.15	FLNC	86.708	225.178	17.474	-3.614	0.492	-9.836	7.9e-23	3.0e-20
ENSG00000067177.14	PHKA1	10.764	27.597	2.347	-3.095	0.483	-9.823	9.0e-23	3.4e-20
ENSG00000110693.17	SOX6	4.218	9.309	1.673	-1.947	0.562	-9.813	9.9e-23	3.7e-20
ENSG00000204219.9	TCEA3	108.004	292.046	15.983	-4.109	0.583	-9.803	1.1e-22	4.0e-20
ENSG00000267060.5	PTGES3L	25.021	69.692	2.685	-4.262	0.565	-9.799	1.1e-22	4.1e-20
ENSG00000183386.9	FHL3	275.434	723.031	51.636	-3.782	0.517	-9.782	1.3e-22	4.8e-20
ENSG00000227877.6	MRLN	54.289	155.217	3.825	-5.017	0.622	-9.748	1.9e-22	6.6e-20
ENSG00000036448.9	MYOM2	58.263	150.181	12.305	-3.506	0.789	-9.747	1.9e-22	6.6e-20
ENSG00000185052.11	SLC24A3	3.703	10.277	0.417	-2.993	0.6	-9.715	2.6e-22	8.9e-20
ENSG00000113916.17	BCL6	79.5	215.358	11.571	-4.105	0.521	-9.704	2.9e-22	9.8e-20
ENSG00000205683.11	DPF3	3.96	10.442	0.72	-2.734	0.569	-9.695	3.2e-22	1.1e-19
ENSG00000070182.20	SPTB	20.584	57.635	2.059	-4.261	0.739	-9.691	3.3e-22	1.1e-19
ENSG00000163710.7	PCOLCE2	12.757	35.481	1.395	-3.929	0.696	-9.687	3.4e-22	1.1e-19
ENSG00000182253.14	SYNM	50.01	142.339	3.846	-4.887	0.653	-9.669	4.1e-22	1.3e-19
ENSG00000151729.10	SLC25A4	194.163	554.39	14.049	-5.206	0.662	-9.668	4.1e-22	1.3e-19
ENSG00000156219.16	ART3	114.798	325.454	9.469	-4.963	0.721	-9.667	4.1e-22	1.3e-19
ENSG00000064042.17	LIMCH1	25.21	67.819	3.905	-3.811	0.621	-9.663	4.3e-22	1.3e-19
ENSG00000172403.10	SYNPO2	54.433	154.936	4.181	-4.911	0.674	-9.633	5.8e-22	1.8e-19
ENSG00000184185.9	KCNJ12	5.867	17.042	0.279	-3.818	0.739	-9.63	6.0e-22	1.8e-19
ENSG00000132429.9	POPDC3	42.712	125.218	1.459	-5.682	0.813	-9.605	7.6e-22	2.3e-19
ENSG00000124374.8	PAIP2B	10.555	28.881	1.391	-3.643	0.578	-9.595	8.4e-22	2.5e-19
ENSG00000035664.11	DAPK2	17.864	46.123	3.734	-3.315	0.543	-9.546	1.3e-21	3.9e-19
ENSG00000165731.18	RET	2.741	7.274	0.474	-2.488	0.612	-9.528	1.6e-21	4.7e-19
ENSG00000143549.19	TPM3	1247.49	3335.51	203.486	-4.028	0.509	-9.516	1.8e-21	5.2e-19
ENSG00000148677.6	ANKRD1	18.305	54.576	0.169	-5.571	0.986	-9.509	1.9e-21	5.5e-19
ENSG00000142661.18	MYOM3	25.348	71.137	2.453	-4.385	0.78	-9.504	2.0e-21	5.7e-19
ENSG00000163884.3	KLF15	12.282	35.136	0.854	-4.285	0.673	-9.503	2.0e-21	5.7e-19
ENSG00000170162.13	VGLL2	13.103	37.972	0.669	-4.546	0.748	-9.47	2.8e-21	7.7e-19
ENSG00000071282.11	LMCD1	185.143	534.125	10.653	-5.521	0.661	-9.467	2.9e-21	7.9e-19
ENSG00000181092.9	ADIPOQ	2.045	5.878	0.128	-2.609	0.715	-9.464	3.0e-21	8.0e-19
ENSG00000105290.11	APLP1	82.644	0.977	123.478	5.977	0.685	9.457	3.2e-21	8.5e-19
ENSG00000131409.12	LRRC4B	23.198	0.108	34.743	5.012	0.765	9.453	3.3e-21	8.8e-19
ENSG00000248746.5	ACTN3	80.618	232.539	4.658	-5.367	0.729	-9.449	3.4e-21	9.0e-19
ENSG00000058404.19	CAMK2B	17.382	49.951	1.097	-4.602	0.734	-9.435	3.9e-21	1.0e-18
ENSG00000077279.18	DCX	20.151	0.057	30.198	4.884	0.875	9.431	4.0e-21	1.0e-18
ENSG00000077274.8	CAPN6	335.452	5.039	500.659	6.376	0.579	9.392	5.9e-21	1.5e-18
ENSG00000081052.12	COL4A4	1.974	5.712	0.105	-2.603	0.707	-9.378	6.7e-21	1.7e-18
ENSG00000173894.10	CBX2	14.173	0.232	21.144	4.168	0.552	9.374	7.0e-21	1.7e-18
ENSG00000163126.14	ANKRD23	248.071	706.22	18.996	-5.144	0.761	-9.356	8.2e-21	2.0e-18
ENSG00000181016.9	LSMEM1	17.239	44.829	3.444	-3.366	0.603	-9.349	8.9e-21	2.2e-18
ENSG00000152556.16	PFKM	222.017	509.852	78.1	-2.691	0.44	-9.338	9.8e-21	2.4e-18
ENSG00000163157.14	TMOD4	181.956	531.897	6.985	-6.06	0.871	-9.328	1.1e-20	2.6e-18
ENSG00000145949.10	MYLK4	2.247	6.158	0.291	-2.471	0.601	-9.321	1.2e-20	2.8e-18
ENSG00000006283.17	CACNA1G	7.713	0.055	11.542	3.572	0.856	9.32	1.2e-20	2.8e-18
ENSG00000165917.9	RAPSN	13.436	38.328	0.99	-4.305	0.76	-9.304	1.3e-20	3.2e-18
ENSG00000112992.16	NNT	43.351	104.963	12.546	-2.968	0.461	-9.287	1.6e-20	3.7e-18
ENSG00000125744.11	RTN2	104.39	270.632	21.269	-3.609	0.531	-9.27	1.9e-20	4.3e-18
ENSG00000224982.3	TMEM233	8.437	23.444	0.934	-3.66	0.637	-9.233	2.6e-20	6.1e-18
ENSG00000141449.14	GREB1L	2.666	7.662	0.168	-2.891	0.597	-9.221	3.0e-20	6.7e-18
ENSG00000078399.17	HOXA9	5.436	15.02	0.645	-3.284	0.621	-9.22	3.0e-20	6.7e-18
ENSG00000174437.16	ATP2A2	435.018	1169.07	67.992	-4.084	0.579	-9.206	3.4e-20	7.5e-18
ENSG00000197766.7	CFD	151.858	448.704	3.436	-6.664	0.887	-9.202	3.5e-20	7.8e-18
ENSG00000075239.13	ACAT1	131.045	295.805	48.664	-2.579	0.487	-9.191	3.9e-20	8.6e-18
ENSG00000181856.14	SLC2A4	34.539	101.369	1.123	-5.591	0.843	-9.177	4.4e-20	9.7e-18
ENSG00000164530.13	PI16	16.238	47.504	0.604	-4.918	0.864	-9.166	4.9e-20	1.1e-17
ENSG00000185686.17	PRAME	140.36	0	210.541	7.725	1.562	9.149	5.7e-20	1.2e-17
ENSG00000122180.4	MYOG	21.251	63.237	0.258	-5.675	0.988	-9.138	6.4e-20	1.4e-17
ENSG00000105707.13	HPN	5.892	13.521	2.077	-2.239	0.614	-9.129	6.9e-20	1.5e-17
ENSG00000170558.8	CDH2	15.305	0.493	22.711	3.989	0.55	9.123	7.3e-20	1.5e-17
ENSG00000185482.7	STAC3	356.243	1011.32	28.704	-5.091	0.726	-9.112	8.1e-20	1.7e-17
ENSG00000149575.5	SCN2B	1.08	3	0.121	-1.835	0.643	-9.105	8.6e-20	1.8e-17
ENSG00000169071.14	ROR2	12.93	0.147	19.321	4.147	0.6	9.087	1.0e-19	2.1e-17
ENSG00000036672.15	USP2	22.742	60.322	3.953	-3.63	0.558	-9.056	1.4e-19	2.8e-17
ENSG00000175920.17	DOK7	4.67	11.588	1.211	-2.51	0.668	-9.042	1.5e-19	3.1e-17
ENSG00000171992.12	SYNPO	98.766	268.824	13.737	-4.195	0.579	-9.041	1.5e-19	3.1e-17
ENSG00000178821.12	TMEM52	105.84	313.301	2.109	-6.66	0.918	-9.024	1.8e-19	3.6e-17
ENSG00000144596.12	GRIP2	7.725	21.972	0.602	-3.842	0.719	-8.997	2.3e-19	4.6e-17
ENSG00000107147.12	KCNT1	4.759	12.466	0.906	-2.821	0.637	-8.994	2.4e-19	4.7e-17
ENSG00000186335.8	SLC36A2	14.745	43.138	0.549	-4.833	0.782	-8.991	2.4e-19	4.7e-17
ENSG00000078814.15	MYH7B	31.043	85.727	3.701	-4.205	0.656	-8.978	2.8e-19	5.3e-17
ENSG00000135469.13	COQ10A	67.819	176.145	13.657	-3.595	0.541	-8.975	2.8e-19	5.4e-17
ENSG00000196593.9	ANKRD20A19P	8.773	23.312	1.504	-3.279	0.573	-8.969	3.0e-19	5.7e-17
ENSG00000169169.14	CPT1C	145.473	1.359	217.531	6.533	0.696	8.967	3.0e-19	5.8e-17
ENSG00000151150.21	ANK3	20.742	57.353	2.436	-4.086	0.54	-8.955	3.4e-19	6.3e-17
ENSG00000151726.13	ACSL1	50.888	124.935	13.864	-3.083	0.529	-8.955	3.4e-19	6.4e-17
ENSG00000009950.15	MLXIPL	7.76	20.908	1.186	-3.325	0.624	-8.952	3.5e-19	6.4e-17
ENSG00000155511.17	GRIA1	18.027	0.554	26.763	4.159	0.608	8.933	4.1e-19	7.6e-17
ENSG00000154545.16	MAGED4	43.246	0.329	64.705	5.627	0.815	8.933	4.1e-19	7.6e-17
ENSG00000168621.14	GDNF	3.063	8.51	0.34	-2.827	0.62	-8.916	4.9e-19	8.8e-17
ENSG00000121769.7	FABP3	576.68	1699.62	15.213	-6.713	0.909	-8.907	5.2e-19	9.4e-17
ENSG00000235162.8	C12orf75	75.947	205.462	11.189	-4.082	0.601	-8.907	5.2e-19	9.4e-17
ENSG00000130528.11	HRC	36.773	107.165	1.577	-5.391	0.817	-8.901	5.5e-19	9.8e-17
ENSG00000161281.10	COX7A1	533.723	1565.11	18.03	-6.363	0.884	-8.894	5.9e-19	1.0e-16
ENSG00000143196.4	DPT	28.221	82.839	0.912	-5.455	0.868	-8.883	6.5e-19	1.1e-16
ENSG00000089101.17	CFAP61	4.596	11.817	0.986	-2.69	0.696	-8.877	6.9e-19	1.2e-16
ENSG00000187678.9	SPRY4	95.083	2.372	141.439	5.4	0.519	8.873	7.1e-19	1.2e-16
ENSG00000185028.3	LRRC14B	5.156	15.14	0.165	-3.793	0.867	-8.872	7.2e-19	1.2e-16
ENSG00000254726.2	MEX3A	26.66	0.037	39.971	5.304	0.96	8.866	7.6e-19	1.3e-16
ENSG00000108515.17	ENO3	1672.29	4776.63	120.121	-5.302	0.827	-8.858	8.2e-19	1.4e-16
ENSG00000176890.15	TYMS	48.329	0.914	72.036	5.254	0.623	8.838	9.8e-19	1.6e-16
ENSG00000130940.14	CASZ1	7.683	21.262	0.893	-3.556	0.582	-8.832	1.0e-18	1.7e-16
ENSG00000005981.12	ASB4	3.717	9.243	0.954	-2.39	0.507	-8.829	1.1e-18	1.7e-16
ENSG00000198796.6	ALPK2	7.771	22.571	0.371	-4.104	0.903	-8.829	1.1e-18	1.7e-16
ENSG00000165474.6	GJB2	38.461	0.05	57.667	5.804	0.992	8.829	1.1e-18	1.7e-16
ENSG00000124406.16	ATP8A1	7.941	20.533	1.645	-3.025	0.56	-8.825	1.1e-18	1.8e-16
ENSG00000112796.9	ENPP5	1.779	5.016	0.16	-2.375	0.795	-8.817	1.2e-18	1.9e-16
ENSG00000164434.11	FABP7	11.595	33.659	0.563	-4.471	0.709	-8.801	1.4e-18	2.2e-16
ENSG00000111087.9	GLI1	140.966	1.64	210.629	6.325	0.725	8.794	1.4e-18	2.3e-16
ENSG00000147889.17	CDKN2A	68.465	0.247	102.574	6.376	0.92	8.792	1.5e-18	2.4e-16
ENSG00000182132.13	KCNIP1	42.071	0.523	62.845	5.389	0.705	8.781	1.6e-18	2.6e-16
ENSG00000273540.3	AGBL1	1.476	3.734	0.346	-1.814	0.573	-8.774	1.7e-18	2.7e-16
ENSG00000203867.7	RBM20	2.865	5.35	1.623	-1.276	0.522	-8.77	1.8e-18	2.8e-16
ENSG00000163110.14	PDLIM5	264.613	765.548	14.146	-5.661	0.711	-8.762	1.9e-18	3.0e-16
ENSG00000101236.16	RNF24	29.665	0.816	44.089	4.634	0.526	8.744	2.2e-18	3.5e-16
ENSG00000164309.14	CMYA5	189.373	555.121	6.499	-6.213	0.85	-8.737	2.4e-18	3.7e-16
ENSG00000118804.8	STBD1	14.617	42.496	0.678	-4.696	0.817	-8.705	3.2e-18	4.9e-16
ENSG00000159251.6	ACTC1	9.494	28.16	0.162	-4.65	0.973	-8.7	3.3e-18	5.1e-16
ENSG00000253293.4	HOXA10	19.171	48.214	4.649	-3.123	0.537	-8.692	3.6e-18	5.4e-16
ENSG00000124766.6	SOX4	53.965	1.247	80.324	5.177	0.556	8.682	3.9e-18	5.9e-16
ENSG00000139116.18	KIF21A	4.665	11.207	1.395	-2.35	0.589	-8.644	5.4e-18	8.1e-16
ENSG00000127324.8	TSPAN8	18.254	53.27	0.746	-4.958	0.863	-8.633	6.0e-18	8.9e-16
ENSG00000167705.11	RILP	14.428	36.208	3.538	-3.036	0.573	-8.622	6.6e-18	9.8e-16
ENSG00000139914.6	FITM1	71.999	209.387	3.306	-5.611	0.868	-8.613	7.1e-18	1.1e-15
ENSG00000112208.11	BAG2	2.571	6.211	0.751	-2.042	0.492	-8.601	7.9e-18	1.2e-15
ENSG00000163833.7	FBXO40	11.089	32.627	0.32	-4.671	0.91	-8.58	9.5e-18	1.4e-15
ENSG00000130222.10	GADD45G	32	85.239	5.381	-3.757	0.604	-8.57	1.0e-17	1.5e-15
ENSG00000188176.11	SMTNL2	50.515	149.925	0.81	-6.382	0.99	-8.556	1.2e-17	1.7e-15
ENSG00000169031.19	COL4A3	22.567	66.919	0.391	-5.61	0.878	-8.549	1.2e-17	1.8e-15
ENSG00000112852.6	PCDHB2	24.784	0.409	36.972	4.753	0.595	8.544	1.3e-17	1.9e-15
ENSG00000185271.8	KLHL33	8.385	24.279	0.437	-4.136	0.811	-8.524	1.5e-17	2.2e-15
ENSG00000149925.18	ALDOA	2390.72	6582.3	294.935	-4.475	0.693	-8.509	1.8e-17	2.5e-15
ENSG00000172828.12	CES3	5.165	14.201	0.646	-3.207	0.631	-8.508	1.8e-17	2.5e-15
ENSG00000009709.11	PAX7	1.074	2.899	0.161	-1.747	0.655	-8.507	1.8e-17	2.5e-15
ENSG00000185100.10	ADSSL1	235.035	574.202	65.452	-3.114	0.556	-8.503	1.8e-17	2.6e-15
ENSG00000135447.16	PPP1R1A	138.376	371.266	21.931	-4.021	0.642	-8.492	2.0e-17	2.8e-15
ENSG00000185269.11	NOTUM	2.159	6.364	0.056	-2.801	0.911	-8.49	2.1e-17	2.9e-15
ENSG00000107859.9	PITX3	4.823	13.066	0.702	-3.047	0.638	-8.478	2.3e-17	3.1e-15
ENSG00000214872.8	SMTNL1	45.053	132.705	1.227	-5.908	0.934	-8.472	2.4e-17	3.3e-15
ENSG00000186868.15	MAPT	6.712	16.766	1.685	-2.726	0.519	-8.468	2.5e-17	3.4e-15
ENSG00000285043.1	ALDOA	16.743	41.851	4.189	-3.046	0.626	-8.467	2.5e-17	3.4e-15
ENSG00000108947.4	EFNB3	8.432	0.079	12.609	3.657	0.742	8.462	2.6e-17	3.5e-15
ENSG00000009694.13	TENM1	30.961	0.854	46.015	4.664	0.645	8.459	2.7e-17	3.6e-15
ENSG00000132840.9	BHMT2	4.811	13.585	0.424	-3.357	0.677	-8.457	2.7e-17	3.6e-15
ENSG00000138798.11	EGF	7.678	22.447	0.293	-4.18	0.915	-8.457	2.7e-17	3.6e-15
ENSG00000166819.11	PLIN1	5.308	15.091	0.417	-3.506	0.748	-8.446	3.0e-17	4.0e-15
ENSG00000147573.16	TRIM55	5.333	15.778	0.11	-3.918	1.029	-8.44	3.2e-17	4.2e-15
ENSG00000106483.11	SFRP4	7.264	18.854	1.469	-3.007	0.574	-8.44	3.2e-17	4.2e-15
ENSG00000131747.14	TOP2A	18.549	0.157	27.745	4.634	0.744	8.426	3.6e-17	4.7e-15
ENSG00000101892.11	ATP1B4	8.43	24.941	0.175	-4.465	0.987	-8.422	3.7e-17	4.8e-15
ENSG00000213144.2	AC084880.1	10.64	31.92	0	-5.041	1.27	-8.421	3.7e-17	4.8e-15
ENSG00000226306.6	NPY6R	4.914	13.899	0.422	-3.39	0.771	-8.42	3.8e-17	4.8e-15
ENSG00000185760.15	KCNQ5	4.042	9.834	1.146	-2.336	0.736	-8.415	3.9e-17	5.0e-15
ENSG00000135063.18	FAM189A2	9.25	26.68	0.535	-4.172	0.794	-8.402	4.4e-17	5.6e-15
ENSG00000188001.9	TPRG1	4.442	10.838	1.243	-2.4	0.645	-8.394	4.7e-17	6.0e-15
ENSG00000078328.20	RBFOX1	21.568	55.56	4.572	-3.344	0.593	-8.389	4.9e-17	6.2e-15
ENSG00000158856.18	DMTN	10.957	25.581	3.645	-2.517	0.489	-8.378	5.4e-17	6.7e-15
ENSG00000167701.13	GPT	19.084	48.584	4.334	-3.217	0.593	-8.369	5.8e-17	7.2e-15
ENSG00000132329.10	RAMP1	37.17	106.328	2.592	-4.901	0.792	-8.367	5.9e-17	7.3e-15
ENSG00000162520.14	SYNC	8.933	25.232	0.784	-3.879	0.888	-8.355	6.5e-17	8.0e-15
ENSG00000079739.15	PGM1	131.642	359.483	17.722	-4.267	0.665	-8.35	6.8e-17	8.4e-15
ENSG00000170417.15	TMEM182	40.503	61.831	29.838	-1.027	0.516	-8.346	7.0e-17	8.6e-15
ENSG00000127325.18	BEST3	14.536	40.471	1.568	-4.013	0.694	-8.33	8.1e-17	9.9e-15
ENSG00000072071.16	ADGRL1	46.122	2.828	67.768	4.167	0.544	8.328	8.2e-17	9.9e-15
ENSG00000142583.17	SLC2A5	8.943	21.975	2.427	-2.745	0.511	-8.328	8.2e-17	9.9e-15
ENSG00000166592.11	RRAD	48.289	141.759	1.555	-5.804	0.929	-8.316	9.1e-17	1.1e-14
ENSG00000029534.20	ANK1	93.856	270.159	5.704	-5.338	0.623	-8.307	9.8e-17	1.2e-14
ENSG00000160469.16	BRSK1	47.311	0.448	70.742	5.631	0.713	8.296	1.1e-16	1.3e-14
ENSG00000156804.7	FBXO32	74.877	206.27	9.181	-4.348	0.712	-8.291	1.1e-16	1.3e-14
ENSG00000115592.11	PRKAG3	10.652	30.908	0.525	-4.387	0.918	-8.266	1.4e-16	1.6e-14
ENSG00000131174.4	COX7B	73.652	159.464	30.746	-2.338	0.471	-8.264	1.4e-16	1.7e-14
ENSG00000105711.11	SCN1B	59.708	169.751	4.686	-4.908	0.729	-8.26	1.5e-16	1.7e-14
ENSG00000148848.14	ADAM12	14.677	0.021	22.006	4.495	0.989	8.258	1.5e-16	1.7e-14
ENSG00000166289.5	PLEKHF1	21.41	61.144	1.543	-4.611	0.78	-8.254	1.5e-16	1.8e-14
ENSG00000167588.12	GPD1	55.391	162.449	1.863	-5.835	0.915	-8.245	1.7e-16	1.9e-14
ENSG00000101871.14	MID1	13.114	0.386	19.477	3.885	0.516	8.221	2.0e-16	2.3e-14
ENSG00000069535.13	MAOB	21.662	61.338	1.825	-4.464	0.768	-8.215	2.1e-16	2.4e-14
ENSG00000179388.8	EGR3	31.625	0.69	47.092	4.831	0.692	8.213	2.2e-16	2.5e-14
ENSG00000172508.10	CARNS1	10.511	23.566	3.984	-2.301	0.705	-8.195	2.5e-16	2.8e-14
ENSG00000122477.12	LRRC39	95.587	257.957	14.402	-4.072	0.639	-8.18	2.8e-16	3.2e-14
ENSG00000007314.12	SCN4A	10.225	29.439	0.618	-4.233	0.846	-8.175	3.0e-16	3.3e-14
ENSG00000141965.4	FEM1A	31.005	75.118	8.949	-2.936	0.522	-8.174	3.0e-16	3.3e-14
ENSG00000143164.15	DCAF6	96.115	200.072	44.137	-2.155	0.45	-8.173	3.0e-16	3.4e-14
ENSG00000164776.9	PHKG1	63.239	164.302	12.708	-3.592	0.662	-8.17	3.1e-16	3.4e-14
ENSG00000182676.4	PPP1R27	125.832	373.125	2.186	-6.876	1.021	-8.165	3.2e-16	3.6e-14
ENSG00000149256.15	TENM4	13.049	0.199	19.474	4.094	0.542	8.155	3.5e-16	3.9e-14
ENSG00000072422.16	RHOBTB1	60.646	165.787	8.075	-4.2	0.609	-8.147	3.7e-16	4.1e-14
ENSG00000178568.14	ERBB4	0.38	1.103	0.019	-1.045	0.824	-8.143	3.9e-16	4.2e-14
ENSG00000163599.14	CTLA4	43.5	0.024	65.238	6.015	1.214	8.132	4.2e-16	4.6e-14
ENSG00000182054.9	IDH2	192.068	470.948	52.628	-3.138	0.534	-8.123	4.6e-16	5.0e-14
ENSG00000110076.18	NRXN2	48.665	2.71	71.642	4.291	0.497	8.122	4.6e-16	5.0e-14
ENSG00000187193.8	MT1X	698.378	2027.81	33.664	-5.871	0.885	-8.106	5.2e-16	5.6e-14
ENSG00000100285.9	NEFH	7.356	0.074	10.998	3.482	0.735	8.106	5.2e-16	5.6e-14
ENSG00000136404.15	TM6SF1	10.901	22.386	5.158	-1.925	0.616	-8.102	5.4e-16	5.8e-14
ENSG00000175564.12	UCP3	42.119	112.472	6.943	-3.837	0.647	-8.095	5.7e-16	6.1e-14
ENSG00000092529.23	CAPN3	148.967	398.075	24.413	-3.973	0.756	-8.093	5.8e-16	6.2e-14
ENSG00000141161.11	UNC45B	13.277	38.994	0.419	-4.817	0.976	-8.092	5.9e-16	6.2e-14
ENSG00000165410.14	CFL2	210.864	583.523	24.535	-4.517	0.677	-8.087	6.1e-16	6.4e-14
ENSG00000123453.17	SARDH	8.803	0.254	13.077	3.489	0.642	8.084	6.2e-16	6.5e-14
ENSG00000102683.7	SGCG	23.717	70.17	0.491	-5.577	1.026	-8.083	6.3e-16	6.6e-14
ENSG00000073464.11	CLCN4	4.81	12.206	1.112	-2.644	0.641	-8.078	6.6e-16	6.8e-14
ENSG00000187243.16	MAGED4B	189.126	0.79	283.294	7.311	0.88	8.077	6.7e-16	6.9e-14
ENSG00000133105.7	RXFP2	36.454	0	54.681	5.799	1.597	8.071	7.0e-16	7.2e-14
ENSG00000121753.12	ADGRB2	11.476	0.386	17.022	3.701	0.617	8.063	7.5e-16	7.7e-14
ENSG00000157087.18	ATP2B2	3.661	8.714	1.134	-2.186	0.748	-8.061	7.6e-16	7.7e-14
ENSG00000176887.6	SOX11	9.713	0.04	14.55	3.902	0.92	8.044	8.7e-16	8.9e-14
ENSG00000132953.16	XPO4	23.71	58.804	6.164	-3.062	0.556	-8.037	9.2e-16	9.3e-14
ENSG00000064300.8	NGFR	147.171	0.704	220.404	7.022	0.885	8.034	9.5e-16	9.6e-14
ENSG00000107438.8	PDLIM1	103.819	231.571	39.944	-2.506	0.48	-8.014	1.1e-15	1.1e-13
ENSG00000163050.16	COQ8A	172.477	402.44	57.496	-2.786	0.539	-8.011	1.1e-15	1.1e-13
ENSG00000151929.9	BAG3	63.5	154.006	18.248	-3.01	0.532	-8.01	1.1e-15	1.1e-13
ENSG00000155657.26	TTN	75.543	218.49	4.069	-5.436	0.879	-8.005	1.2e-15	1.2e-13
ENSG00000136153.19	LMO7	20.471	50.012	5.7	-2.928	0.603	-8.002	1.2e-15	1.2e-13
ENSG00000168785.7	TSPAN5	23.145	0.714	34.361	4.367	0.596	7.987	1.4e-15	1.4e-13
ENSG00000188338.14	SLC38A3	12.713	35.349	1.396	-3.923	0.889	-7.982	1.4e-15	1.4e-13
ENSG00000122971.8	ACADS	24.031	59.219	6.436	-3.018	0.558	-7.977	1.5e-15	1.5e-13
ENSG00000139220.16	PPFIA2	12.332	0.169	18.414	4.054	0.742	7.975	1.5e-15	1.5e-13
ENSG00000150054.18	MPP7	1.887	4.994	0.334	-2.168	0.653	-7.963	1.7e-15	1.6e-13
ENSG00000151322.18	NPAS3	9.804	0.401	14.505	3.468	0.601	7.961	1.7e-15	1.7e-13
ENSG00000146147.14	MLIP	32.668	95.578	1.214	-5.447	1.016	-7.945	1.9e-15	1.9e-13
ENSG00000075213.10	SEMA3A	7.218	0.012	10.821	3.546	1.045	7.943	2.0e-15	1.9e-13
ENSG00000101608.12	MYL12A	1222.6	3180.83	243.486	-3.702	0.603	-7.943	2.0e-15	1.9e-13
ENSG00000213337.8	ANKRD39	20.93	34.168	14.312	-1.2	0.529	-7.926	2.3e-15	2.2e-13
ENSG00000105499.13	PLA2G4C	40.307	77.107	21.908	-1.77	0.484	-7.924	2.3e-15	2.2e-13
ENSG00000165197.4	VEGFD	4.002	11.291	0.357	-3.179	0.776	-7.908	2.6e-15	2.5e-13
ENSG00000119969.14	HELLS	14.359	0.204	21.436	4.22	0.626	7.908	2.6e-15	2.5e-13
ENSG00000234438.3	KBTBD13	2.113	6.179	0.08	-2.733	0.938	-7.906	2.7e-15	2.5e-13
ENSG00000154930.14	ACSS1	9.844	25.295	2.119	-3.076	0.606	-7.892	3.0e-15	2.8e-13
ENSG00000120053.10	GOT1	83.126	206.056	21.661	-3.192	0.579	-7.891	3.0e-15	2.8e-13
ENSG00000250878.3	METTL21EP	2.478	6.917	0.258	-2.654	0.737	-7.884	3.2e-15	3.0e-13
ENSG00000146729.9	NIPSNAP2	145.617	324.112	56.369	-2.503	0.489	-7.863	3.8e-15	3.5e-13
ENSG00000206077.10	ZDHHC11B	1.347	3.63	0.205	-1.942	0.7	-7.855	4.0e-15	3.7e-13
ENSG00000073711.10	PPP2R3A	25.11	60.047	7.642	-2.82	0.534	-7.855	4.0e-15	3.7e-13
ENSG00000089685.14	BIRC5	10.952	0.069	16.393	4.024	0.825	7.85	4.2e-15	3.8e-13
ENSG00000169783.12	LINGO1	9.917	0.161	14.795	3.766	0.776	7.848	4.2e-15	3.9e-13
ENSG00000143365.17	RORC	9	26.564	0.218	-4.5	0.999	-7.84	4.5e-15	4.1e-13
ENSG00000170175.10	CHRNB1	21.431	53.511	5.39	-3.093	0.643	-7.838	4.6e-15	4.2e-13
ENSG00000126562.16	WNK4	11.837	0.28	17.615	3.863	0.833	7.83	4.9e-15	4.4e-13
ENSG00000158106.13	RHPN1	51.445	0.449	76.943	5.749	0.82	7.826	5.0e-15	4.6e-13
ENSG00000115361.7	ACADL	3.354	8.207	0.927	-2.256	0.717	-7.821	5.2e-15	4.7e-13
ENSG00000182580.2	EPHB3	34.402	0.545	51.331	5.082	0.681	7.821	5.2e-15	4.7e-13
ENSG00000095321.16	CRAT	33.725	75.191	12.992	-2.445	0.498	-7.815	5.5e-15	4.9e-13
ENSG00000168079.16	SCARA5	10.318	26.806	2.075	-3.177	0.636	-7.815	5.5e-15	4.9e-13
ENSG00000138615.5	CILP	5.201	13.97	0.816	-3.043	0.677	-7.813	5.6e-15	5.0e-13
ENSG00000198881.9	ASB12	9.282	26.053	0.896	-3.835	0.772	-7.803	6.0e-15	5.4e-13
ENSG00000172995.16	ARPP21	16.487	48.572	0.445	-5.101	1.114	-7.801	6.1e-15	5.4e-13
ENSG00000137203.11	TFAP2A	17.509	0.088	26.219	4.645	0.926	7.798	6.3e-15	5.5e-13
ENSG00000188783.5	PRELP	3.041	7.848	0.637	-2.434	0.617	-7.796	6.4e-15	5.6e-13
ENSG00000130957.4	FBP2	116.089	340.21	4.029	-6.084	0.978	-7.788	6.8e-15	6.0e-13
ENSG00000163492.15	CCDC141	2.182	6.065	0.24	-2.51	0.627	-7.788	6.8e-15	6.0e-13
ENSG00000134324.11	LPIN1	23.054	48.335	10.414	-2.112	0.465	-7.784	7.0e-15	6.1e-13
ENSG00000144331.19	ZNF385B	3.633	9.723	0.587	-2.756	0.684	-7.773	7.6e-15	6.6e-13
ENSG00000178741.11	COX5A	336.719	783.096	113.531	-2.775	0.509	-7.773	7.7e-15	6.6e-13
ENSG00000163754.17	GYG1	76.515	192.961	18.293	-3.33	0.606	-7.769	7.9e-15	6.8e-13
ENSG00000197971.14	MBP	16.563	43.529	3.081	-3.448	0.703	-7.764	8.3e-15	7.1e-13
ENSG00000129152.3	MYOD1	8.12	23.404	0.478	-4.046	0.872	-7.763	8.3e-15	7.1e-13
ENSG00000133135.13	RNF128	1.835	5.063	0.221	-2.312	0.739	-7.757	8.7e-15	7.5e-13
ENSG00000262993.1	KRT31	1.398	4.195	0	-2.377	1.297	-7.756	8.8e-15	7.5e-13
ENSG00000003989.17	SLC7A2	18.737	44.361	5.926	-2.711	0.525	-7.755	8.8e-15	7.5e-13
ENSG00000149948.13	HMGA2	26.113	0.661	38.838	4.584	0.806	7.751	9.1e-15	7.7e-13
ENSG00000188677.14	PARVB	47.345	112.863	14.586	-2.869	0.56	-7.747	9.4e-15	8.0e-13
ENSG00000164674.15	SYTL3	3.464	8.608	0.891	-2.345	0.584	-7.741	9.9e-15	8.3e-13
ENSG00000162409.10	PRKAA2	7.132	20.31	0.543	-3.788	0.826	-7.73	1.1e-14	9.0e-13
ENSG00000142973.13	CYP4B1	8.283	21.991	1.429	-3.243	0.755	-7.73	1.1e-14	9.0e-13
ENSG00000136842.13	TMOD1	30.157	89.693	0.388	-6.03	1.159	-7.728	1.1e-14	9.1e-13
ENSG00000025039.14	RRAGD	12.381	34.631	1.256	-3.981	0.76	-7.719	1.2e-14	9.8e-13
ENSG00000171016.12	PYGO1	3.446	8.131	1.104	-2.117	0.551	-7.716	1.2e-14	1.0e-12
ENSG00000124107.5	SLPI	9.481	28.073	0.186	-4.616	1.087	-7.715	1.2e-14	1.0e-12
ENSG00000153404.14	PLEKHG4B	9.723	0.038	14.565	3.907	0.69	7.709	1.3e-14	1.0e-12
ENSG00000163820.14	FYCO1	23.707	61.142	4.989	-3.375	0.639	-7.704	1.3e-14	1.1e-12
ENSG00000187715.13	KBTBD12	6.358	18.309	0.382	-3.804	0.909	-7.699	1.4e-14	1.1e-12
ENSG00000068615.18	REEP1	7.414	20.686	0.778	-3.608	0.809	-7.697	1.4e-14	1.1e-12
ENSG00000198542.13	ITGBL1	2.783	7.411	0.469	-2.518	0.674	-7.689	1.5e-14	1.2e-12
ENSG00000139209.15	SLC38A4	2.048	5.839	0.153	-2.568	0.909	-7.681	1.6e-14	1.3e-12
ENSG00000171368.11	TPPP	1.3	3.308	0.296	-1.733	0.609	-7.681	1.6e-14	1.3e-12
ENSG00000143320.8	CRABP2	390.247	5.689	582.526	6.447	0.731	7.668	1.8e-14	1.4e-12
ENSG00000198794.11	SCAMP5	16.853	0.195	25.181	4.453	0.705	7.665	1.8e-14	1.4e-12
ENSG00000069011.15	PITX1	3.37	8.961	0.574	-2.662	0.686	-7.656	1.9e-14	1.5e-12
ENSG00000166343.9	MSS51	34.488	88.889	7.287	-3.439	0.628	-7.652	2.0e-14	1.6e-12
ENSG00000235956.9	PRRT1	35.247	0.451	52.645	5.208	0.817	7.648	2.0e-14	1.6e-12
ENSG00000144815.15	NXPE3	7.775	19.006	2.159	-2.663	0.552	-7.646	2.1e-14	1.6e-12
ENSG00000277586.2	NEFL	19.483	0.061	29.194	4.831	1.084	7.639	2.2e-14	1.7e-12
ENSG00000156103.15	MMP16	6.617	0.11	9.87	3.291	0.676	7.627	2.4e-14	1.9e-12
ENSG00000129474.15	AJUBA	19.914	1.386	29.178	3.661	0.572	7.626	2.4e-14	1.9e-12
ENSG00000108342.12	CSF3	2.607	7.55	0.135	-2.913	1.041	-7.619	2.6e-14	2.0e-12
ENSG00000132464.11	ENAM	3.755	3.336	3.965	0.195	0.678	-7.611	2.7e-14	2.1e-12
ENSG00000115468.11	EFHD1	11.883	29.302	3.173	-2.86	0.59	-7.609	2.8e-14	2.2e-12
ENSG00000134013.15	LOXL2	57.763	2.371	85.459	4.681	0.562	7.605	2.8e-14	2.2e-12
ENSG00000067191.15	CACNB1	69.514	184.269	12.137	-3.818	0.646	-7.599	3.0e-14	2.3e-12
ENSG00000175591.11	P2RY2	5.993	17.637	0.171	-3.992	1.024	-7.589	3.2e-14	2.5e-12
ENSG00000166681.13	BEX3	353.769	18.384	521.462	4.752	0.471	7.587	3.3e-14	2.5e-12
ENSG00000112394.16	SLC16A10	4.046	9.498	1.321	-2.177	0.569	-7.586	3.3e-14	2.5e-12
ENSG00000170634.12	ACYP2	63.121	165.302	12.031	-3.674	0.636	-7.582	3.4e-14	2.6e-12
ENSG00000267978.5	MAGEA9B	44.877	0	67.315	6.094	1.575	7.563	3.9e-14	3.0e-12
ENSG00000112186.11	CAP2	59.643	173.311	2.809	-5.516	0.955	-7.56	4.0e-14	3.1e-12
ENSG00000171033.12	PKIA	162.882	471.815	8.416	-5.65	0.885	-7.555	4.2e-14	3.2e-12
ENSG00000010282.14	HHATL	75.303	221.228	2.341	-6.056	1.108	-7.546	4.5e-14	3.4e-12
ENSG00000136383.6	ALPK3	33.351	89.658	5.197	-3.871	0.703	-7.54	4.7e-14	3.6e-12
ENSG00000147166.10	ITGB1BP2	13.721	33.538	3.813	-2.843	0.635	-7.537	4.8e-14	3.6e-12
ENSG00000174429.3	ABRA	16.845	49.786	0.375	-5.207	1.092	-7.536	4.8e-14	3.6e-12
ENSG00000213171.2	LINGO4	0.847	2.529	0.006	-1.811	1.3	-7.533	5.0e-14	3.7e-12
ENSG00000117152.13	RGS4	12.503	0.319	18.595	3.892	0.799	7.526	5.2e-14	3.9e-12
ENSG00000108878.4	CACNG1	62.816	186.859	0.795	-6.709	1.204	-7.517	5.6e-14	4.2e-12
ENSG00000165194.15	PCDH19	15.628	0.464	23.21	4.048	0.643	7.512	5.8e-14	4.3e-12
ENSG00000136378.14	ADAMTS7	48.084	0.543	71.855	5.561	0.766	7.507	6.0e-14	4.5e-12
ENSG00000136295.14	TTYH3	25.749	1.315	37.966	4.073	0.462	7.502	6.3e-14	4.6e-12
ENSG00000142494.13	SLC47A1	7.448	19.366	1.49	-3.032	0.669	-7.501	6.4e-14	4.7e-12
ENSG00000148773.13	MKI67	11.437	0.165	17.073	3.955	0.937	7.5	6.4e-14	4.7e-12
ENSG00000164107.8	HAND2	30.326	0.235	45.372	5.231	1.001	7.497	6.5e-14	4.8e-12
ENSG00000101104.12	PABPC1L	145.803	1.355	218.027	6.539	0.888	7.493	6.7e-14	4.9e-12
ENSG00000144712.11	CAND2	14.891	26.98	8.846	-1.507	0.47	-7.482	7.3e-14	5.4e-12
ENSG00000073792.15	IGF2BP2	66.255	1.078	98.843	5.586	0.636	7.472	7.9e-14	5.8e-12
ENSG00000163520.13	FBLN2	36.437	89.93	9.69	-3.088	0.607	-7.471	8.0e-14	5.8e-12
ENSG00000109805.9	NCAPG	8.015	0.162	11.941	3.478	0.803	7.469	8.1e-14	5.9e-12
ENSG00000172216.5	CEBPB	72.315	178.496	19.225	-3.15	0.59	-7.465	8.3e-14	6.0e-12
ENSG00000237412.6	PRSS56	1.797	5.203	0.094	-2.503	0.944	-7.458	8.8e-14	6.3e-12
ENSG00000278817.1	AC007325.4	24.746	67.957	3.141	-4.058	0.752	-7.458	8.8e-14	6.3e-12
ENSG00000101265.15	RASSF2	31.815	1.216	47.114	4.44	0.546	7.452	9.2e-14	6.6e-12
ENSG00000078668.13	VDAC3	297.025	684.51	103.283	-2.717	0.508	-7.447	9.5e-14	6.8e-12
ENSG00000135744.7	AGT	5.547	15.886	0.378	-3.615	0.877	-7.44	1.0e-13	7.2e-12
ENSG00000270885.1	RASL10B	7.216	13.44	4.103	-1.501	0.607	-7.433	1.1e-13	7.5e-12
ENSG00000188662.6	HILS1	3.38	9.873	0.134	-3.261	0.977	-7.426	1.1e-13	7.9e-12
ENSG00000196535.15	MYO18A	66.367	160.471	19.316	-2.991	0.499	-7.425	1.1e-13	8.0e-12
ENSG00000166257.8	SCN3B	1.834	4.323	0.589	-1.744	0.631	-7.424	1.1e-13	8.0e-12
ENSG00000198892.6	SHISA4	78.615	217.857	8.994	-4.453	0.763	-7.421	1.2e-13	8.2e-12
ENSG00000170412.16	GPRC5C	15.174	35.291	5.115	-2.569	0.567	-7.404	1.3e-13	9.3e-12
ENSG00000125166.12	GOT2	68.459	171.044	17.167	-3.243	0.62	-7.403	1.3e-13	9.3e-12
ENSG00000115828.15	QPCT	30.592	0.671	45.552	4.8	0.657	7.402	1.3e-13	9.3e-12
ENSG00000178662.15	CSRNP3	13.397	0.106	20.043	4.25	0.806	7.394	1.4e-13	9.9e-12
ENSG00000132854.18	KANK4	5.226	0.076	7.801	3.032	0.716	7.378	1.6e-13	1.1e-11
ENSG00000121057.12	AKAP1	23.833	45.935	12.783	-1.768	0.454	-7.377	1.6e-13	1.1e-11
ENSG00000250510.7	GPR162	51.559	0.719	76.979	5.503	0.698	7.376	1.6e-13	1.1e-11
ENSG00000197616.11	MYH6	4.077	12.072	0.08	-3.597	1.12	-7.374	1.7e-13	1.1e-11
ENSG00000140525.17	FANCI	16.206	1.302	23.659	3.421	0.668	7.363	1.8e-13	1.2e-11
ENSG00000105953.14	OGDH	36.495	80.179	14.652	-2.375	0.509	-7.362	1.8e-13	1.2e-11
ENSG00000197321.14	SVIL	82.547	171.146	38.248	-2.133	0.639	-7.361	1.8e-13	1.3e-11
ENSG00000115616.2	SLC9A2	0.55	1.608	0.021	-1.353	0.95	-7.359	1.9e-13	1.3e-11
ENSG00000111049.3	MYF5	1.287	3.861	0	-2.281	1.35	-7.346	2.0e-13	1.4e-11
ENSG00000151967.18	SCHIP1	21.453	58.044	3.158	-3.828	0.689	-7.346	2.0e-13	1.4e-11
ENSG00000121577.13	POPDC2	18.817	45.397	5.528	-2.829	0.634	-7.342	2.1e-13	1.4e-11
ENSG00000143333.6	RGS16	21.577	0.86	31.936	4.146	0.547	7.34	2.1e-13	1.4e-11
ENSG00000159348.12	CYB5R1	102.905	257.743	25.486	-3.288	0.632	-7.337	2.2e-13	1.5e-11
ENSG00000165175.15	MID1IP1	42.129	90.912	17.738	-2.294	0.47	-7.333	2.2e-13	1.5e-11
ENSG00000154096.13	THY1	362.17	6.6	539.955	6.153	0.749	7.333	2.3e-13	1.5e-11
ENSG00000275575.4	PTP4A3	129.326	330.694	28.642	-3.484	0.586	-7.331	2.3e-13	1.5e-11
ENSG00000123689.5	G0S2	77.004	196.343	17.334	-3.428	0.637	-7.33	2.3e-13	1.5e-11
ENSG00000125430.8	HS3ST3B1	13.205	0.378	19.618	3.904	0.632	7.325	2.4e-13	1.6e-11
ENSG00000102802.9	MEDAG	2.928	7.814	0.486	-2.568	0.788	-7.317	2.5e-13	1.7e-11
ENSG00000138029.13	HADHB	147.5	322.124	60.189	-2.401	0.495	-7.293	3.0e-13	2.0e-11
ENSG00000139880.19	CDH24	57.63	0.468	86.211	5.892	0.856	7.29	3.1e-13	2.1e-11
ENSG00000148357.16	HMCN2	6.166	17.029	0.734	-3.378	0.845	-7.286	3.2e-13	2.1e-11
ENSG00000167136.6	ENDOG	33.623	81.226	9.822	-2.926	0.579	-7.283	3.3e-13	2.1e-11
ENSG00000173221.13	GLRX	31.272	78.482	7.667	-3.197	0.625	-7.271	3.6e-13	2.3e-11
ENSG00000137198.9	GMPR	75.731	210.061	8.566	-4.464	0.849	-7.265	3.7e-13	2.4e-11
ENSG00000185915.5	KLHL34	2.15	6.307	0.071	-2.77	1.042	-7.264	3.8e-13	2.5e-11
ENSG00000119938.8	PPP1R3C	55.744	139.543	13.844	-3.243	0.623	-7.26	3.9e-13	2.5e-11
ENSG00000097046.12	CDC7	15.163	0.284	22.603	4.201	0.741	7.256	4.0e-13	2.6e-11
ENSG00000129749.3	CHRNA10	7.421	18.064	2.099	-2.621	0.62	-7.25	4.2e-13	2.7e-11
ENSG00000188488.13	SERPINA5	2.024	5.734	0.169	-2.527	0.949	-7.247	4.3e-13	2.8e-11
ENSG00000100628.11	ASB2	49.979	147.39	1.273	-6.028	1.128	-7.235	4.6e-13	3.0e-11
ENSG00000109265.14	KIAA1211	20.835	0.009	31.248	4.998	1.391	7.232	4.8e-13	3.1e-11
ENSG00000112782.16	CLIC5	26.308	73.57	2.678	-4.342	0.84	-7.231	4.8e-13	3.1e-11
ENSG00000106302.9	HYAL4	1.348	3.372	0.337	-1.71	0.752	-7.231	4.8e-13	3.1e-11
ENSG00000070731.10	ST6GALNAC2	3.661	8.45	1.267	-2.059	0.766	-7.225	5.0e-13	3.2e-11
ENSG00000185842.15	DNAH14	41.753	1.068	62.096	4.931	0.728	7.223	5.1e-13	3.2e-11
ENSG00000112183.14	RBM24	101.863	289.704	7.943	-5.023	0.874	-7.22	5.2e-13	3.3e-11
ENSG00000152700.13	SAR1B	31.536	70.022	12.294	-2.418	0.561	-7.219	5.2e-13	3.3e-11
ENSG00000116771.5	AGMAT	6.423	16.299	1.485	-2.799	0.648	-7.212	5.5e-13	3.5e-11
ENSG00000112425.14	EPM2A	13.798	29.5	5.948	-2.134	0.503	-7.212	5.5e-13	3.5e-11
ENSG00000172731.13	LRRC20	44.693	110.32	11.879	-3.112	0.599	-7.21	5.6e-13	3.5e-11
ENSG00000101057.15	MYBL2	10.821	0.062	16.2	4.017	0.972	7.2	6.0e-13	3.8e-11
ENSG00000175262.14	C1orf127	1.914	4.844	0.449	-2.011	0.709	-7.196	6.2e-13	3.9e-11
ENSG00000143476.17	DTL	7.869	0.05	11.779	3.605	0.869	7.194	6.3e-13	3.9e-11
ENSG00000006118.14	TMEM132A	144.274	1.116	215.852	6.679	0.768	7.193	6.4e-13	4.0e-11
ENSG00000095397.13	WHRN	10.659	0.175	15.902	3.846	0.697	7.19	6.5e-13	4.0e-11
ENSG00000183837.9	PNMA3	16.524	0.018	24.778	4.662	1.315	7.188	6.6e-13	4.1e-11
ENSG00000164591.13	MYOZ3	24.329	50.733	11.128	-2.093	0.584	-7.176	7.2e-13	4.5e-11
ENSG00000272573.5	MUSTN1	270.401	782.05	14.577	-5.652	0.957	-7.147	8.8e-13	5.5e-11
ENSG00000138795.9	LEF1	17.185	0.373	25.591	4.275	0.825	7.143	9.1e-13	5.6e-11
ENSG00000175130.6	MARCKSL1	200.031	4.334	297.879	5.808	0.691	7.143	9.1e-13	5.6e-11
ENSG00000176909.11	MAMSTR	19.14	43.909	6.755	-2.534	0.492	-7.142	9.2e-13	5.7e-11
ENSG00000143198.12	MGST3	232.617	521.52	88.165	-2.551	0.515	-7.141	9.3e-13	5.7e-11
ENSG00000100092.21	SH3BP1	28.179	1.547	41.496	4.061	0.622	7.137	9.5e-13	5.8e-11
ENSG00000135636.13	DYSF	14.228	32.875	4.904	-2.52	0.581	-7.137	9.5e-13	5.8e-11
ENSG00000108861.8	DUSP3	33.447	79.488	10.426	-2.816	0.603	-7.137	9.6e-13	5.8e-11
ENSG00000170049.9	KCNAB3	25.682	0.291	38.377	4.931	0.909	7.136	9.6e-13	5.8e-11
ENSG00000104177.17	MYEF2	34.633	1.547	51.177	4.357	0.563	7.127	1.0e-12	6.2e-11
ENSG00000178222.12	RNF212	130.973	2.706	195.107	5.726	0.638	7.125	1.0e-12	6.3e-11
ENSG00000131069.19	ACSS2	50.372	109.835	20.641	-2.357	0.568	-7.119	1.1e-12	6.6e-11
ENSG00000129250.11	KIF1C	65.37	145.165	25.473	-2.465	0.537	-7.117	1.1e-12	6.6e-11
ENSG00000161249.20	DMKN	38.148	0.571	56.937	5.205	0.652	7.111	1.2e-12	6.9e-11
ENSG00000072832.14	CRMP1	32.469	1.598	47.904	4.234	0.519	7.11	1.2e-12	7.0e-11
ENSG00000161682.14	FAM171A2	8.869	0.135	13.236	3.648	0.789	7.108	1.2e-12	7.1e-11
ENSG00000156970.12	BUB1B	11.22	0.04	16.81	4.098	0.955	7.107	1.2e-12	7.1e-11
ENSG00000158828.7	PINK1	87.256	180.822	40.473	-2.132	0.477	-7.106	1.2e-12	7.1e-11
ENSG00000104812.14	GYS1	51.685	102.626	26.214	-1.929	0.52	-7.095	1.3e-12	7.7e-11
ENSG00000198732.10	SMOC1	2.331	6.008	0.493	-2.231	0.937	-7.094	1.3e-12	7.7e-11
ENSG00000275131.2	AC241952.1	31.028	79.683	6.701	-3.389	0.729	-7.087	1.4e-12	8.1e-11
ENSG00000135902.9	CHRND	2.747	7.368	0.436	-2.543	0.936	-7.082	1.4e-12	8.4e-11
ENSG00000164976.8	MYORG	7.716	18.611	2.268	-2.585	0.599	-7.08	1.4e-12	8.5e-11
ENSG00000172803.17	SNX32	25.726	0.14	38.519	5.116	0.916	7.072	1.5e-12	9.0e-11
ENSG00000188037.10	CLCN1	11.378	33.666	0.234	-4.812	1.138	-7.066	1.6e-12	9.3e-11
ENSG00000122952.16	ZWINT	39.473	0.337	59.041	5.489	0.976	7.062	1.6e-12	9.6e-11
ENSG00000142675.17	CNKSR1	18.073	47.618	3.3	-3.499	0.691	-7.062	1.6e-12	9.6e-11
ENSG00000112246.9	SIM1	0.467	1.358	0.021	-1.208	0.994	-7.057	1.7e-12	9.9e-11
ENSG00000186326.3	RGS9BP	1.025	2.955	0.059	-1.901	0.951	-7.057	1.7e-12	9.9e-11
ENSG00000163808.16	KIF15	13.01	0.181	19.424	4.112	0.852	7.056	1.7e-12	9.9e-11
ENSG00000011426.10	ANLN	7.479	0.231	11.103	3.297	0.909	7.05	1.8e-12	1.0e-10
ENSG00000169083.16	AR	1.549	4.242	0.202	-2.124	0.862	-7.041	1.9e-12	1.1e-10
ENSG00000120217.13	CD274	2.002	4.327	0.84	-1.534	0.596	-7.038	1.9e-12	1.1e-10
ENSG00000164142.15	FAM160A1	2.113	5.862	0.238	-2.471	0.851	-7.031	2.1e-12	1.2e-10
ENSG00000100033.16	PRODH	3.837	10.416	0.547	-2.883	0.598	-7.018	2.2e-12	1.3e-10
ENSG00000198848.12	CES1	1.383	3.994	0.078	-2.212	1.309	-7.018	2.3e-12	1.3e-10
ENSG00000132321.16	IQCA1	11.191	0.122	16.725	3.982	0.81	7.009	2.4e-12	1.4e-10
ENSG00000145626.11	UGT3A1	0.942	2.436	0.195	-1.523	0.749	-7	2.6e-12	1.5e-10
ENSG00000254585.2	MAGEL2	6.234	0.089	9.307	3.242	0.772	6.999	2.6e-12	1.5e-10
ENSG00000115884.10	SDC1	12.247	0	18.37	4.276	1.604	6.995	2.6e-12	1.5e-10
ENSG00000138678.10	GPAT3	5.94	17.09	0.366	-3.728	0.969	-6.986	2.8e-12	1.6e-10
ENSG00000161558.10	TMEM143	12.808	26.591	5.916	-1.996	0.566	-6.975	3.1e-12	1.7e-10
ENSG00000175832.12	ETV4	77.557	0.614	116.028	6.18	0.972	6.966	3.3e-12	1.8e-10
ENSG00000087303.17	NID2	55.608	3.465	81.68	4.211	0.516	6.966	3.3e-12	1.8e-10
ENSG00000117724.12	CENPF	35.419	0.4	52.929	5.267	0.933	6.961	3.4e-12	1.9e-10
ENSG00000099957.16	P2RX6	16.757	45.746	2.263	-3.84	0.932	-6.96	3.4e-12	1.9e-10
ENSG00000166123.13	GPT2	28.273	73.549	5.634	-3.49	0.71	-6.958	3.5e-12	1.9e-10
ENSG00000115107.19	STEAP3	3.94	9.573	1.124	-2.316	0.613	-6.956	3.5e-12	2.0e-10
ENSG00000104415.14	WISP1	7.378	0.181	10.977	3.342	0.762	6.953	3.6e-12	2.0e-10
ENSG00000214456.8	PLIN5	58.021	143.073	15.495	-3.127	0.662	-6.95	3.7e-12	2.0e-10
ENSG00000254445.1	HSPB2-C11orf52	12.396	36.403	0.393	-4.747	1.103	-6.945	3.8e-12	2.1e-10
ENSG00000119866.21	BCL11A	13.229	0.264	19.711	4.034	0.666	6.944	3.8e-12	2.1e-10
ENSG00000273889.2	FAM83H	2.429	0.029	3.629	2.17	0.847	6.941	3.9e-12	2.1e-10
ENSG00000134769.21	DTNA	38.969	99.694	8.606	-3.39	0.652	-6.932	4.2e-12	2.3e-10
ENSG00000087884.14	AAMDC	103.762	245.889	32.698	-2.873	0.594	-6.928	4.3e-12	2.3e-10
ENSG00000198894.7	CIPC	18.717	42.102	7.024	-2.425	0.539	-6.924	4.4e-12	2.4e-10
ENSG00000159167.11	STC1	18.562	0.221	27.733	4.557	0.831	6.923	4.4e-12	2.4e-10
ENSG00000198554.11	WDHD1	9.598	0.494	14.15	3.342	0.587	6.923	4.4e-12	2.4e-10
ENSG00000072401.14	UBE2D1	38.034	79.207	17.447	-2.12	0.543	-6.92	4.5e-12	2.5e-10
ENSG00000198826.10	ARHGAP11A	7.075	0.063	10.581	3.446	0.789	6.918	4.6e-12	2.5e-10
ENSG00000275428.2	AC024940.7	60.04	0.184	89.969	6.264	1.211	6.916	4.7e-12	2.5e-10
ENSG00000141744.3	PNMT	7.759	22.425	0.427	-4.037	0.985	-6.912	4.8e-12	2.6e-10
ENSG00000211448.11	DIO2	1.43	2.496	0.898	-0.882	0.726	-6.908	4.9e-12	2.7e-10
ENSG00000151725.11	CENPU	22.486	0.652	33.403	4.38	0.682	6.906	5.0e-12	2.7e-10
ENSG00000146350.13	TBC1D32	24.201	1.222	35.69	4.046	0.524	6.899	5.2e-12	2.8e-10
ENSG00000206422.2	LRRC30	2.259	6.718	0.03	-2.906	1.303	-6.898	5.3e-12	2.8e-10
ENSG00000198467.14	TPM2	4040.36	10846.2	637.441	-4.087	0.782	-6.895	5.4e-12	2.9e-10
ENSG00000168477.18	TNXB	10.576	27.599	2.064	-3.222	0.766	-6.889	5.6e-12	3.0e-10
ENSG00000137807.14	KIF23	11.261	0.343	16.72	3.721	0.79	6.889	5.6e-12	3.0e-10
ENSG00000107165.12	TYRP1	1.143	3.175	0.128	-1.888	1.058	-6.884	5.8e-12	3.1e-10
ENSG00000162639.15	HENMT1	40.087	1.85	59.206	4.401	0.541	6.877	6.1e-12	3.3e-10
ENSG00000276495.4	APBA2	12.89	0.048	19.311	4.276	1.113	6.873	6.3e-12	3.4e-10
ENSG00000034053.14	APBA2	11.195	0.075	16.755	4.046	1.019	6.872	6.3e-12	3.4e-10
ENSG00000077942.18	FBLN1	28.769	56.01	15.148	-1.82	0.493	-6.871	6.4e-12	3.4e-10
ENSG00000137094.14	DNAJB5	26.013	66.132	5.954	-3.271	0.666	-6.868	6.5e-12	3.4e-10
ENSG00000175063.16	UBE2C	51.945	0.475	77.68	5.737	0.875	6.865	6.6e-12	3.5e-10
ENSG00000159217.9	IGF2BP1	7.426	0.003	11.138	3.598	1.486	6.859	7.0e-12	3.7e-10
ENSG00000164093.16	PITX2	21.749	48.294	8.477	-2.379	0.548	-6.858	7.0e-12	3.7e-10
ENSG00000112984.11	KIF20A	10.072	0.292	14.962	3.627	0.929	6.857	7.0e-12	3.7e-10
ENSG00000205707.10	ETFRF1	35.507	73.684	16.418	-2.1	0.494	-6.853	7.2e-12	3.8e-10
ENSG00000203797.9	DDO	1.861	5.171	0.207	-2.354	0.847	-6.853	7.2e-12	3.8e-10
ENSG00000186951.16	PPARA	10.581	20.02	5.862	-1.615	0.593	-6.852	7.3e-12	3.8e-10
ENSG00000061337.15	LZTS1	12.624	0.22	18.826	4.022	0.759	6.836	8.2e-12	4.2e-10
ENSG00000163013.11	FBXO41	3.649	0.111	5.418	2.53	0.622	6.827	8.7e-12	4.5e-10
ENSG00000117399.13	CDC20	28.368	0.176	42.465	5.208	0.939	6.825	8.8e-12	4.6e-10
ENSG00000198846.5	TOX	5.155	0.102	7.682	2.978	0.73	6.824	8.9e-12	4.6e-10
ENSG00000179431.6	FJX1	18.136	0.427	26.991	4.294	0.704	6.823	8.9e-12	4.6e-10
ENSG00000073578.16	SDHA	97.59	157.242	67.765	-1.202	0.471	-6.822	9.0e-12	4.6e-10
ENSG00000100302.6	RASD2	1.651	3.89	0.532	-1.675	0.592	-6.817	9.3e-12	4.8e-10
ENSG00000103150.5	MLYCD	4.8	10.707	1.846	-2.041	0.554	-6.816	9.3e-12	4.8e-10
ENSG00000059915.16	PSD	27.221	1.214	40.225	4.219	0.659	6.811	9.7e-12	5.0e-10
ENSG00000065675.14	PRKCQ	17.811	44.319	4.557	-3.028	0.664	-6.806	1.0e-11	5.1e-10
ENSG00000120254.15	MTHFD1L	11.356	0.265	16.902	3.823	0.599	6.804	1.0e-11	5.2e-10
ENSG00000187741.14	FANCA	19.331	0.732	28.63	4.096	0.781	6.803	1.0e-11	5.2e-10
ENSG00000183092.16	BEGAIN	13.911	0.134	20.8	4.265	0.855	6.796	1.1e-11	5.5e-10
ENSG00000154127.9	UBASH3B	10.397	0.224	15.483	3.751	0.684	6.778	1.2e-11	6.2e-10
ENSG00000126787.12	DLGAP5	10.168	0.117	15.193	3.858	0.847	6.777	1.2e-11	6.2e-10
ENSG00000119929.12	CUTC	83.234	212.466	18.618	-3.444	0.711	-6.774	1.3e-11	6.4e-10
ENSG00000130508.10	PXDN	86.325	3.997	127.488	4.684	0.609	6.771	1.3e-11	6.5e-10
ENSG00000129744.2	ART1	6.62	18.338	0.761	-3.457	1.062	-6.767	1.3e-11	6.6e-10
ENSG00000122873.11	CISD1	33.406	71.133	14.542	-2.214	0.572	-6.765	1.3e-11	6.7e-10
ENSG00000138796.16	HADH	55.866	117.153	25.222	-2.172	0.486	-6.754	1.4e-11	7.2e-10
ENSG00000105643.9	ARRDC2	39.721	97.496	10.834	-3.057	0.69	-6.753	1.5e-11	7.3e-10
ENSG00000185267.9	CDNF	10.61	24.438	3.695	-2.438	0.542	-6.74	1.6e-11	7.9e-10
ENSG00000168779.19	SHOX2	62.341	2.026	92.499	4.95	0.652	6.738	1.6e-11	8.0e-10
ENSG00000119711.12	ALDH6A1	8.347	16.903	4.069	-1.821	0.543	-6.738	1.6e-11	8.0e-10
ENSG00000073670.13	ADAM11	11.132	0.122	16.637	3.974	0.867	6.729	1.7e-11	8.5e-10
ENSG00000176165.10	FOXG1	13.991	0.004	20.985	4.452	1.557	6.728	1.7e-11	8.5e-10
ENSG00000151388.10	ADAMTS12	9.885	0.634	14.511	3.247	0.619	6.728	1.7e-11	8.5e-10
ENSG00000161681.15	SHANK1	10.704	0.199	15.957	3.822	0.866	6.728	1.7e-11	8.5e-10
ENSG00000099875.14	MKNK2	106.288	211.666	53.6	-1.962	0.507	-6.723	1.8e-11	8.8e-10
ENSG00000105472.12	CLEC11A	130.347	2.22	194.411	5.924	0.792	6.721	1.8e-11	8.9e-10
ENSG00000182013.17	PNMA8A	21.295	0.708	31.589	4.254	0.638	6.715	1.9e-11	9.2e-10
ENSG00000187764.11	SEMA4D	16.088	32.63	7.817	-1.931	0.506	-6.714	1.9e-11	9.3e-10
ENSG00000109390.11	NDUFC1	91.021	170.5	51.282	-1.714	0.503	-6.713	1.9e-11	9.3e-10
ENSG00000118707.9	TGIF2	26.895	1.033	39.826	4.328	0.601	6.713	1.9e-11	9.3e-10
ENSG00000171848.14	RRM2	10.215	0.067	15.29	3.932	0.947	6.711	1.9e-11	9.4e-10
ENSG00000008118.9	CAMK1G	18.977	0.009	28.461	4.867	1.491	6.707	2.0e-11	9.7e-10
ENSG00000170390.15	DCLK2	13.597	1.198	19.797	3.242	0.561	6.705	2.0e-11	9.8e-10
ENSG00000187664.8	HAPLN4	4.689	0.023	7.022	2.971	0.99	6.7	2.1e-11	1.0e-9
ENSG00000117425.13	PTCH2	67.713	0.584	101.278	6.013	0.945	6.696	2.1e-11	1.0e-9
ENSG00000138495.6	COX17	86.15	195.773	31.339	-2.605	0.606	-6.693	2.2e-11	1.1e-9
ENSG00000115641.18	FHL2	15.737	36.218	5.496	-2.518	0.554	-6.689	2.2e-11	1.1e-9
ENSG00000217236.1	SP9	11.505	0.213	17.151	3.904	0.784	6.688	2.3e-11	1.1e-9
ENSG00000165983.14	PTER	2.394	5.858	0.661	-2.046	0.643	-6.686	2.3e-11	1.1e-9
ENSG00000138160.5	KIF11	6.199	0.154	9.221	3.146	0.71	6.685	2.3e-11	1.1e-9
ENSG00000083857.13	FAT1	129.42	3.756	192.252	5.345	0.671	6.681	2.4e-11	1.1e-9
ENSG00000214776.12	AC092821.1	6.98	0.119	10.41	3.35	0.821	6.68	2.4e-11	1.1e-9
ENSG00000169570.9	DTWD2	3.958	8.987	1.444	-2.031	0.55	-6.673	2.5e-11	1.2e-9
ENSG00000123485.11	HJURP	10.763	0.429	15.93	3.566	0.858	6.664	2.7e-11	1.3e-9
ENSG00000186185.13	KIF18B	11.863	0.06	17.765	4.146	1.01	6.662	2.7e-11	1.3e-9
ENSG00000171476.21	HOPX	5.993	13.956	2.012	-2.312	0.551	-6.661	2.7e-11	1.3e-9
ENSG00000175984.14	DENND2C	9.752	21.396	3.93	-2.184	0.588	-6.657	2.8e-11	1.3e-9
ENSG00000213694.3	S1PR3	28.104	1.226	41.544	4.256	0.579	6.654	2.9e-11	1.4e-9
ENSG00000183166.10	CALN1	3.362	0.048	5.02	2.522	1.16	6.648	3.0e-11	1.4e-9
ENSG00000228594.3	FNDC10	11.452	0.307	17.025	3.786	0.702	6.647	3.0e-11	1.4e-9
ENSG00000283787.1	AC051649.2	2.999	7.787	0.605	-2.453	0.729	-6.642	3.1e-11	1.5e-9
ENSG00000106992.18	AK1	329.643	839.094	74.917	-3.468	0.72	-6.639	3.2e-11	1.5e-9
ENSG00000182533.6	CAV3	25.347	74.539	0.75	-5.432	1.204	-6.635	3.2e-11	1.5e-9
ENSG00000162458.12	FBLIM1	30.025	1.21	44.432	4.361	0.616	6.63	3.4e-11	1.6e-9
ENSG00000073282.12	TP63	5.231	14.837	0.427	-3.472	0.942	-6.628	3.4e-11	1.6e-9
ENSG00000136261.14	BZW2	77.809	164.94	34.243	-2.235	0.512	-6.627	3.4e-11	1.6e-9
ENSG00000170004.16	CHD3	145.919	6.613	215.572	4.83	0.511	6.623	3.5e-11	1.6e-9
ENSG00000147799.11	ARHGAP39	6.817	0.158	10.147	3.267	0.725	6.621	3.6e-11	1.7e-9
ENSG00000172366.19	MCRIP2	37.417	90.148	11.052	-2.919	0.608	-6.615	3.7e-11	1.7e-9
ENSG00000176485.11	PLA2G16	33.871	86.872	7.371	-3.392	0.712	-6.611	3.8e-11	1.8e-9
ENSG00000132849.20	PATJ	10.59	15.959	7.905	-0.929	0.539	-6.611	3.8e-11	1.8e-9
ENSG00000100373.9	UPK3A	2.443	7.055	0.138	-2.824	1.008	-6.611	3.8e-11	1.8e-9
ENSG00000183785.14	TUBA8	19.77	53.512	2.898	-3.806	0.816	-6.607	3.9e-11	1.8e-9
ENSG00000136717.14	BIN1	250.024	534.345	107.864	-2.298	0.513	-6.6	4.1e-11	1.9e-9
ENSG00000139318.7	DUSP6	126.377	7.985	185.572	4.376	0.571	6.582	4.6e-11	2.1e-9
ENSG00000114923.16	SLC4A3	34.516	0.604	51.471	5.032	0.847	6.578	4.8e-11	2.2e-9
ENSG00000054392.12	HHAT	8.284	0.289	12.281	3.365	0.619	6.578	4.8e-11	2.2e-9
ENSG00000122877.15	EGR2	35.223	0.438	52.616	5.221	0.919	6.571	5.0e-11	2.3e-9
ENSG00000197558.11	SSPO	10.977	0.056	16.438	4.046	0.847	6.563	5.3e-11	2.4e-9
ENSG00000112096.17	SOD2	63.71	148.655	21.238	-2.751	0.464	-6.559	5.4e-11	2.5e-9
ENSG00000106078.17	COBL	14.337	41.72	0.646	-4.698	0.993	-6.554	5.6e-11	2.5e-9
ENSG00000213585.10	VDAC1	195.324	376.823	104.574	-1.839	0.466	-6.55	5.7e-11	2.6e-9
ENSG00000143228.12	NUF2	19.428	0.101	29.092	4.772	1.062	6.55	5.8e-11	2.6e-9
ENSG00000142945.12	KIF2C	20.878	0.364	31.136	4.559	0.831	6.547	5.9e-11	2.7e-9
ENSG00000123364.4	HOXC13	6.042	0.049	9.038	3.259	0.978	6.541	6.1e-11	2.8e-9
ENSG00000066279.17	ASPM	5.624	0.039	8.417	3.18	1.055	6.54	6.1e-11	2.8e-9
ENSG00000143382.14	ADAMTSL4	20.861	43.289	9.646	-2.057	0.557	-6.534	6.4e-11	2.9e-9
ENSG00000156381.8	ANKRD9	39.765	93.31	12.992	-2.753	0.581	-6.529	6.6e-11	3.0e-9
ENSG00000133055.8	MYBPH	1.138	3.242	0.086	-1.966	0.969	-6.523	6.9e-11	3.1e-9
ENSG00000179051.13	RCC2	90.889	3.671	134.499	4.858	0.618	6.521	7.0e-11	3.1e-9
ENSG00000152078.9	TMEM56	2.542	5.993	0.816	-1.945	0.686	-6.52	7.0e-11	3.2e-9
ENSG00000124145.6	SDC4	9.526	23.112	2.733	-2.691	0.653	-6.519	7.1e-11	3.2e-9
ENSG00000188716.5	DUPD1	29.29	85.255	1.307	-5.224	1.108	-6.51	7.5e-11	3.4e-9
ENSG00000173068.17	BNC2	24.222	1.495	35.586	3.874	0.553	6.507	7.6e-11	3.4e-9
ENSG00000111640.14	GAPDH	2584.6	6447.23	653.291	-3.301	0.699	-6.506	7.7e-11	3.4e-9
ENSG00000147576.15	ADHFE1	22.682	49.548	9.25	-2.302	0.607	-6.506	7.7e-11	3.4e-9
ENSG00000144868.13	TMEM108	3.355	8.833	0.615	-2.606	0.788	-6.503	7.9e-11	3.5e-9
ENSG00000152229.18	PSTPIP2	6.55	13.714	2.968	-1.891	0.541	-6.495	8.3e-11	3.7e-9
ENSG00000170522.9	ELOVL6	48.654	5.207	70.377	3.524	0.686	6.484	8.9e-11	3.9e-9
ENSG00000040341.17	STAU2	19.703	41.688	8.711	-2.136	0.489	-6.481	9.1e-11	4.0e-9
ENSG00000185669.5	SNAI3	3.734	10.197	0.502	-2.898	0.854	-6.48	9.2e-11	4.1e-9
ENSG00000133315.10	MACROD1	106.685	216.559	51.748	-2.044	0.649	-6.479	9.2e-11	4.1e-9
ENSG00000004848.7	ARX	4.785	11.453	1.451	-2.345	0.822	-6.478	9.3e-11	4.1e-9
ENSG00000013563.13	DNASE1L1	31.76	70.214	12.533	-2.396	0.566	-6.47	9.8e-11	4.3e-9
ENSG00000164440.14	TXLNB	39.592	96.096	11.339	-2.976	0.703	-6.469	9.8e-11	4.3e-9
ENSG00000108639.7	SYNGR2	51.098	137.319	7.987	-3.944	0.804	-6.468	9.9e-11	4.3e-9
ENSG00000130540.13	SULT4A1	9.749	0	14.623	3.966	1.585	6.466	1.0e-10	4.4e-9
ENSG00000177732.8	SOX12	18.632	0.825	27.536	3.967	0.599	6.464	1.0e-10	4.5e-9
ENSG00000142549.9	IGLON5	21.388	0.009	32.077	5.035	1.603	6.462	1.0e-10	4.5e-9
ENSG00000165113.12	GKAP1	14.905	24.29	10.213	-1.173	0.527	-6.457	1.1e-10	4.6e-9
ENSG00000233450.7	KIFC1	9.573	0.017	14.352	3.916	1.591	6.456	1.1e-10	4.7e-9
ENSG00000173281.4	PPP1R3B	11.08	25.233	4.004	-2.39	0.586	-6.455	1.1e-10	4.7e-9
ENSG00000168078.9	PBK	6.116	0.174	9.087	3.102	0.726	6.454	1.1e-10	4.7e-9
ENSG00000122691.12	TWIST1	24.469	0.551	36.427	4.592	0.712	6.445	1.2e-10	5.0e-9
ENSG00000146670.9	CDCA5	8.867	0.216	13.193	3.545	0.723	6.444	1.2e-10	5.0e-9
ENSG00000131831.17	RAI2	2.539	5.738	0.94	-1.796	0.639	-6.443	1.2e-10	5.0e-9
ENSG00000157227.12	MMP14	273.974	8.287	406.818	5.457	0.732	6.438	1.2e-10	5.2e-9
ENSG00000130005.12	GAMT	198.715	531.354	32.395	-3.995	0.812	-6.436	1.2e-10	5.2e-9
ENSG00000160392.13	C19orf47	50.023	128.609	10.73	-3.466	0.523	-6.432	1.3e-10	5.4e-9
ENSG00000110435.11	PDHX	23.906	42.507	14.605	-1.479	0.471	-6.43	1.3e-10	5.5e-9
ENSG00000111241.2	FGF6	5.869	17.277	0.165	-3.972	1.161	-6.426	1.3e-10	5.6e-9
ENSG00000169021.5	UQCRFS1	35.689	80.612	13.228	-2.52	0.59	-6.424	1.3e-10	5.7e-9
ENSG00000262655.3	SPON1	28.269	0.46	42.173	4.886	0.912	6.421	1.4e-10	5.8e-9
ENSG00000100968.13	NFATC4	454.487	6.589	678.437	6.484	0.733	6.418	1.4e-10	5.9e-9
ENSG00000121101.15	TEX14	5.438	0.115	8.1	3.028	0.806	6.411	1.4e-10	6.1e-9
ENSG00000184985.16	SORCS2	20.627	0.375	30.754	4.529	0.737	6.405	1.5e-10	6.4e-9
ENSG00000024526.16	DEPDC1	4.96	0.06	7.41	2.988	0.927	6.404	1.5e-10	6.4e-9
ENSG00000183856.10	IQGAP3	6.012	0.008	9.015	3.312	1.35	6.402	1.5e-10	6.5e-9
ENSG00000124343.13	XG	1.377	3.421	0.354	-1.707	0.844	-6.396	1.6e-10	6.7e-9
ENSG00000257542.5	OR7E47P	3.111	8.886	0.224	-3.014	1.197	-6.394	1.6e-10	6.8e-9
ENSG00000164616.15	FBXL21	13.309	0	19.963	4.39	1.6	6.392	1.6e-10	6.9e-9
ENSG00000152672.7	CLEC4F	8.798	0.096	13.149	3.691	0.948	6.389	1.7e-10	7.0e-9
ENSG00000132819.16	RBM38	44.075	93.707	19.259	-2.225	0.554	-6.386	1.7e-10	7.2e-9
ENSG00000166922.8	SCG5	18.584	0.123	27.815	4.681	1.124	6.384	1.7e-10	7.2e-9
ENSG00000110427.15	KIAA1549L	2.39	0.068	3.551	2.092	0.692	6.379	1.8e-10	7.5e-9
ENSG00000060138.12	YBX3	905.371	2465.03	125.544	-4.284	0.863	-6.375	1.8e-10	7.6e-9
ENSG00000185436.11	IFNLR1	0.684	1.921	0.066	-1.455	0.958	-6.373	1.8e-10	7.7e-9
ENSG00000138207.13	RBP4	2.417	6.545	0.353	-2.48	0.836	-6.371	1.9e-10	7.8e-9
ENSG00000267318.1	AC005702.1	9.011	23.296	1.868	-3.083	0.767	-6.367	1.9e-10	8.0e-9
ENSG00000173714.7	WFIKKN2	0.506	1.46	0.029	-1.257	1.06	-6.365	2.0e-10	8.1e-9
ENSG00000152642.10	GPD1L	29.31	79.38	4.275	-3.93	0.849	-6.36	2.0e-10	8.3e-9
ENSG00000091831.23	ESR1	1.251	3.195	0.279	-1.714	0.784	-6.36	2.0e-10	8.3e-9
ENSG00000158859.9	ADAMTS4	25.915	0.545	38.6	4.68	0.886	6.358	2.0e-10	8.4e-9
ENSG00000135451.12	TROAP	19.4	0.477	28.862	4.338	1.092	6.358	2.0e-10	8.4e-9
ENSG00000198624.12	CCDC69	20.259	48.772	6.003	-2.829	0.746	-6.355	2.1e-10	8.6e-9
ENSG00000117632.22	STMN1	324.753	15.499	479.381	4.864	0.619	6.354	2.1e-10	8.6e-9
ENSG00000081189.15	MEF2C	45.49	114.199	11.136	-3.247	0.787	-6.35	2.1e-10	8.8e-9
ENSG00000082175.14	PGR	0.179	0.509	0.014	-0.573	1.032	-6.35	2.1e-10	8.8e-9
ENSG00000169679.14	BUB1	7.767	0.378	11.462	3.176	0.882	6.348	2.2e-10	8.9e-9
ENSG00000080709.14	KCNN2	1.354	3.062	0.5	-1.437	0.678	-6.347	2.2e-10	9.0e-9
ENSG00000075618.17	FSCN1	62.383	4	91.575	4.211	0.513	6.346	2.2e-10	9.0e-9
ENSG00000160703.15	NLRX1	4.353	10.952	1.053	-2.541	0.753	-6.344	2.2e-10	9.1e-9
ENSG00000204065.2	TCEAL5	11.433	0.397	16.951	3.684	0.668	6.34	2.3e-10	9.3e-9
ENSG00000186564.5	FOXD2	4.941	0.062	7.381	2.98	0.909	6.34	2.3e-10	9.3e-9
ENSG00000242265.5	PEG10	137.279	2.291	204.773	5.966	0.851	6.338	2.3e-10	9.4e-9
ENSG00000076382.16	SPAG5	37.879	0.588	56.525	5.179	0.822	6.336	2.4e-10	9.5e-9
ENSG00000176194.17	CIDEA	1.915	5.72	0.013	-2.73	1.419	-6.33	2.5e-10	9.9e-9
ENSG00000090889.11	KIF4A	4.074	0.034	6.094	2.779	1.006	6.325	2.5e-10	1.0e-8
ENSG00000130560.8	UBAC1	66.504	119.573	39.97	-1.557	0.471	-6.322	2.6e-10	1.0e-8
ENSG00000118407.14	FILIP1	8.286	17.551	3.654	-1.995	0.598	-6.315	2.7e-10	1.1e-8
ENSG00000102753.9	KPNA3	30.612	61.533	15.152	-1.953	0.511	-6.315	2.7e-10	1.1e-8
ENSG00000184481.16	FOXO4	10.842	21.071	5.728	-1.714	0.515	-6.314	2.7e-10	1.1e-8
ENSG00000174032.16	SLC25A30	10.704	22.29	4.912	-1.978	0.522	-6.314	2.7e-10	1.1e-8
ENSG00000143434.15	SEMA6C	56.924	123.739	23.516	-2.347	0.635	-6.311	2.8e-10	1.1e-8
ENSG00000198075.9	SULT1C4	27.505	1.371	40.573	4.132	0.638	6.31	2.8e-10	1.1e-8
ENSG00000188042.7	ARL4C	22.914	0.605	34.068	4.449	0.74	6.303	2.9e-10	1.2e-8
ENSG00000140990.14	NDUFB10	276.588	590.201	119.782	-2.291	0.545	-6.301	3.0e-10	1.2e-8
ENSG00000188613.6	NANOS1	3.872	9.806	0.904	-2.504	0.75	-6.297	3.0e-10	1.2e-8
ENSG00000079691.17	CARMIL1	20.722	0.863	30.651	4.087	0.564	6.297	3.0e-10	1.2e-8
ENSG00000104549.11	SQLE	15.57	0.62	23.044	3.891	0.672	6.293	3.1e-10	1.2e-8
ENSG00000159713.10	TPPP3	24.859	55.044	9.766	-2.38	0.589	-6.289	3.2e-10	1.3e-8
ENSG00000196352.15	CD55	18.593	43.705	6.038	-2.667	0.671	-6.282	3.3e-10	1.3e-8
ENSG00000179262.9	RAD23A	193.223	406.914	86.378	-2.223	0.593	-6.282	3.3e-10	1.3e-8
ENSG00000205279.8	CTXN3	1.156	3.417	0.025	-2.107	1.306	-6.282	3.4e-10	1.3e-8
ENSG00000121898.12	CPXM2	1.589	3.55	0.609	-1.5	0.615	-6.279	3.4e-10	1.3e-8
ENSG00000162624.14	LHX8	10.392	0	15.588	4.052	1.66	6.276	3.5e-10	1.4e-8
ENSG00000134240.11	HMGCS2	0.937	2.784	0.014	-1.9	1.341	-6.275	3.5e-10	1.4e-8
ENSG00000115129.13	TP53I3	65.519	3.484	96.536	4.443	0.627	6.275	3.5e-10	1.4e-8
ENSG00000276155.4	MAPT	2.656	7.161	0.404	-2.539	0.62	-6.274	3.5e-10	1.4e-8
ENSG00000221843.4	C2orf16	0.896	0.012	1.339	1.209	0.829	6.271	3.6e-10	1.4e-8
ENSG00000148660.20	CAMK2G	21.174	43.575	9.974	-2.022	0.544	-6.271	3.6e-10	1.4e-8
ENSG00000163638.13	ADAMTS9	81.579	5.121	119.808	4.303	0.524	6.271	3.6e-10	1.4e-8
ENSG00000188549.12	CCDC9B	11.254	29.761	2.001	-3.358	0.777	-6.265	3.7e-10	1.5e-8
ENSG00000159556.9	ISL2	9.89	0	14.835	3.985	1.575	6.261	3.8e-10	1.5e-8
ENSG00000038295.7	TLL1	11.063	0.189	16.501	3.88	0.834	6.26	3.9e-10	1.5e-8
ENSG00000188257.10	PLA2G2A	4.228	12.207	0.239	-3.414	1.177	-6.253	4.0e-10	1.6e-8
ENSG00000169738.7	DCXR	50.872	125.104	13.756	-3.095	0.709	-6.239	4.4e-10	1.7e-8
ENSG00000146530.12	VWDE	7.769	0	11.654	3.661	1.565	6.238	4.4e-10	1.7e-8
ENSG00000072195.14	SPEG	35.984	70.924	18.514	-1.882	0.774	-6.237	4.5e-10	1.7e-8
ENSG00000183549.10	ACSM5	3.718	10.154	0.5	-2.895	0.892	-6.235	4.5e-10	1.7e-8
ENSG00000187288.10	CIDEC	1.912	5.55	0.092	-2.584	1.195	-6.228	4.7e-10	1.8e-8
ENSG00000110400.10	NECTIN1	5.97	0.231	8.839	2.999	0.618	6.223	4.9e-10	1.9e-8
ENSG00000181085.14	MAPK15	90.448	0.181	135.581	6.854	1.421	6.223	4.9e-10	1.9e-8
ENSG00000157168.18	NRG1	5.717	0.123	8.515	3.083	1.219	6.215	5.1e-10	2.0e-8
ENSG00000000003.14	TSPAN6	50.424	3.626	73.824	4.016	0.544	6.213	5.2e-10	2.0e-8
ENSG00000198574.5	SH2D1B	1.595	4.219	0.283	-2.024	0.947	-6.212	5.2e-10	2.0e-8
ENSG00000119013.8	NDUFB3	146.834	328.542	55.98	-2.532	0.599	-6.206	5.4e-10	2.1e-8
ENSG00000187260.15	WDR86	42.713	0.844	63.648	5.132	0.841	6.205	5.5e-10	2.1e-8
ENSG00000168386.18	FILIP1L	40.318	97.567	11.694	-2.957	0.532	-6.204	5.5e-10	2.1e-8
ENSG00000005471.16	ABCB4	1.647	4.508	0.217	-2.178	0.903	-6.203	5.6e-10	2.1e-8
ENSG00000180340.6	FZD2	10.627	0.475	15.703	3.501	0.622	6.199	5.7e-10	2.2e-8
ENSG00000138080.13	EMILIN1	94.274	5.48	138.671	4.43	0.48	6.195	5.8e-10	2.2e-8
ENSG00000070159.13	PTPN3	15.06	25.634	9.773	-1.306	0.653	-6.195	5.8e-10	2.2e-8
ENSG00000049089.14	COL9A2	14.294	0.289	21.296	4.113	0.871	6.194	5.9e-10	2.2e-8
ENSG00000177981.10	ASB8	53.722	125.909	17.629	-2.768	0.662	-6.191	6.0e-10	2.2e-8
ENSG00000112041.12	TULP1	14.812	0.372	22.033	4.069	0.821	6.191	6.0e-10	2.2e-8
ENSG00000170276.5	HSPB2	19.579	53.599	2.568	-3.936	0.899	-6.19	6.0e-10	2.3e-8
ENSG00000160191.17	PDE9A	64.745	2.281	95.976	4.885	0.657	6.187	6.1e-10	2.3e-8
ENSG00000130021.13	PUDP	8.422	17.391	3.937	-1.897	0.661	-6.185	6.2e-10	2.3e-8
ENSG00000131398.13	KCNC3	7.332	0.204	10.896	3.304	0.717	6.183	6.3e-10	2.4e-8
ENSG00000117122.13	MFAP2	98.581	2.787	146.478	5.283	0.711	6.183	6.3e-10	2.4e-8
ENSG00000197905.8	TEAD4	12.575	28.568	4.578	-2.406	0.622	-6.181	6.4e-10	2.4e-8
ENSG00000138279.15	ANXA7	42.845	87.036	20.75	-2.017	0.525	-6.181	6.4e-10	2.4e-8
ENSG00000198947.15	DMD	17.445	35.035	8.65	-1.901	0.836	-6.175	6.6e-10	2.5e-8
ENSG00000244274.7	DBNDD2	68.098	173.449	15.423	-3.409	0.741	-6.171	6.8e-10	2.5e-8
ENSG00000206172.8	HBA1	96.267	276.374	6.214	-5.265	1.085	-6.169	6.9e-10	2.5e-8
ENSG00000100626.16	GALNT16	2.548	5.52	1.062	-1.661	0.557	-6.167	7.0e-10	2.6e-8
ENSG00000091136.13	LAMB1	638.718	28.466	943.845	5.003	0.524	6.167	7.0e-10	2.6e-8
ENSG00000227048.2	AC096677.3	11.354	33.221	0.421	-4.59	1.192	-6.165	7.0e-10	2.6e-8
ENSG00000134690.10	CDCA8	9.125	0.138	13.619	3.684	0.885	6.165	7.1e-10	2.6e-8
ENSG00000064547.13	LPAR2	29.966	0.206	44.847	5.249	1	6.162	7.2e-10	2.6e-8
ENSG00000114416.17	FXR1	230.719	463.601	114.278	-2.011	0.471	-6.161	7.2e-10	2.7e-8
ENSG00000163673.7	DCLK3	3.925	0.153	5.811	2.563	0.659	6.16	7.3e-10	2.7e-8
ENSG00000118193.11	KIF14	2.786	0.014	4.172	2.35	1.129	6.154	7.5e-10	2.8e-8
ENSG00000196465.10	MYL6B	310.593	616.14	157.82	-1.958	0.539	-6.15	7.8e-10	2.8e-8
ENSG00000128602.9	SMO	50.793	3.944	74.217	3.927	0.49	6.149	7.8e-10	2.9e-8
ENSG00000125813.13	PAX1	5.366	0.171	7.963	2.936	0.714	6.149	7.8e-10	2.9e-8
ENSG00000274330.1	AL160191.3	0.414	1.241	0	-1.164	1.436	-6.146	7.9e-10	2.9e-8
ENSG00000166813.14	KIF7	13.407	0.517	19.853	3.781	0.608	6.146	8.0e-10	2.9e-8
ENSG00000162631.18	NTNG1	6.098	0.163	9.065	3.113	0.866	6.141	8.2e-10	3.0e-8
ENSG00000164855.15	TMEM184A	1.968	2.127	1.889	-0.115	0.678	-6.141	8.2e-10	3.0e-8
ENSG00000010256.10	UQCRC1	204.056	387.667	112.25	-1.779	0.523	-6.139	8.3e-10	3.0e-8
ENSG00000111665.11	CDCA3	11.249	0.186	16.781	3.906	0.848	6.135	8.5e-10	3.1e-8
ENSG00000221818.8	EBF2	51.269	3.982	74.913	3.93	0.495	6.133	8.6e-10	3.1e-8
ENSG00000106211.8	HSPB1	694.617	1564.73	259.558	-2.587	0.623	-6.131	8.7e-10	3.2e-8
ENSG00000143127.12	ITGA10	20.077	0.47	29.881	4.393	0.821	6.129	8.8e-10	3.2e-8
ENSG00000157456.7	CCNB2	9.55	0.221	14.214	3.64	0.878	6.127	8.9e-10	3.2e-8
ENSG00000171621.13	SPSB1	7.546	15.627	3.505	-1.884	0.562	-6.114	9.7e-10	3.5e-8
ENSG00000062485.18	CS	94.603	157.945	62.932	-1.314	0.451	-6.114	9.7e-10	3.5e-8
ENSG00000112290.12	WASF1	21.475	0.644	31.891	4.323	0.735	6.101	1.1e-9	3.8e-8
ENSG00000189134.3	NKAPL	0.821	2.377	0.043	-1.695	1.138	-6.1	1.1e-9	3.8e-8
ENSG00000039560.13	RAI14	23.877	1.533	35.049	3.831	0.576	6.093	1.1e-9	4.0e-8
ENSG00000140538.16	NTRK3	13.998	0.746	20.625	3.631	0.568	6.09	1.1e-9	4.0e-8
ENSG00000106031.7	HOXA13	0.649	1.664	0.141	-1.223	0.804	-6.087	1.2e-9	4.1e-8
ENSG00000135476.11	ESPL1	5.78	0.052	8.643	3.196	0.999	6.083	1.2e-9	4.2e-8
ENSG00000258461.5	AC012651.1	10.365	24.703	3.196	-2.615	0.646	-6.083	1.2e-9	4.2e-8
ENSG00000008516.16	MMP25	34.623	0.919	51.476	4.773	0.887	6.082	1.2e-9	4.2e-8
ENSG00000162738.5	VANGL2	16.897	0.638	25.027	3.99	0.675	6.076	1.2e-9	4.4e-8
ENSG00000091436.16	MAP3K20	35.54	81.741	12.44	-2.622	0.662	-6.073	1.3e-9	4.5e-8
ENSG00000180190.11	TDRP	21.067	1.611	30.796	3.606	0.654	6.072	1.3e-9	4.5e-8
ENSG00000172458.4	IL17D	75.61	168.168	29.331	-2.48	0.613	-6.07	1.3e-9	4.5e-8
ENSG00000169760.17	NLGN1	7.427	0.184	11.049	3.347	0.778	6.064	1.3e-9	4.7e-8
ENSG00000196811.11	CHRNG	4.124	11.814	0.279	-3.325	1.098	-6.063	1.3e-9	4.7e-8
ENSG00000284672.1	AC109583.3	1.868	4.306	0.649	-1.686	0.64	-6.06	1.4e-9	4.8e-8
ENSG00000138641.16	HERC3	5.344	10.745	2.643	-1.689	0.569	-6.052	1.4e-9	5.0e-8
ENSG00000162512.15	SDC3	50.147	3.307	73.566	4.114	0.531	6.052	1.4e-9	5.0e-8
ENSG00000155313.15	USP25	18.504	35.501	10.006	-1.73	0.54	-6.051	1.4e-9	5.1e-8
ENSG00000154920.14	EME1	8.192	0.378	12.098	3.249	0.744	6.048	1.5e-9	5.2e-8
ENSG00000112742.9	TTK	5.99	0.228	8.871	3.007	0.84	6.047	1.5e-9	5.2e-8
ENSG00000165304.7	MELK	6.696	0.036	10.026	3.411	1.138	6.043	1.5e-9	5.3e-8
ENSG00000273633.1	CDC42EP5	153.961	4.596	228.643	5.359	0.703	6.043	1.5e-9	5.3e-8
ENSG00000004799.7	PDK4	122.988	302.311	33.327	-3.143	0.743	-6.037	1.6e-9	5.5e-8
ENSG00000187098.15	MITF	7.193	12.615	4.483	-1.312	0.645	-6.035	1.6e-9	5.5e-8
ENSG00000137812.19	KNL1	4.256	0.037	6.365	2.829	0.946	6.032	1.6e-9	5.6e-8
ENSG00000143494.15	VASH2	20.644	1.906	30.014	3.416	0.667	6.031	1.6e-9	5.7e-8
ENSG00000175264.7	CHST1	20.014	0.766	29.638	4.117	0.682	6.028	1.7e-9	5.8e-8
ENSG00000115840.13	SLC25A12	39.995	79.161	20.412	-1.904	0.569	-6.024	1.7e-9	5.9e-8
ENSG00000007038.10	PRSS21	31.511	0.358	47.087	5.146	1.18	6.023	1.7e-9	5.9e-8
ENSG00000115310.17	RTN4	290.334	638.261	116.371	-2.445	0.594	-6.019	1.8e-9	6.1e-8
ENSG00000165626.16	BEND7	4.918	9.918	2.417	-1.676	0.539	-6.018	1.8e-9	6.1e-8
ENSG00000196850.5	PPTC7	15.806	33.855	6.781	-2.163	0.585	-6.016	1.8e-9	6.2e-8
ENSG00000117139.16	KDM5B	46.973	2.125	69.398	4.494	0.603	6.015	1.8e-9	6.2e-8
ENSG00000088340.15	FER1L4	12.623	0.384	18.742	3.834	0.926	6.013	1.8e-9	6.3e-8
ENSG00000149571.11	KIRREL3	17.259	0.164	25.806	4.525	1.131	6.011	1.8e-9	6.3e-8
ENSG00000065833.8	ME1	4.714	12.68	0.731	-2.982	0.879	-6.003	1.9e-9	6.7e-8
ENSG00000178127.12	NDUFV2	207.924	409.543	107.114	-1.925	0.513	-5.995	2.0e-9	7.0e-8
ENSG00000144619.14	CNTN4	20.947	1.178	30.832	3.869	0.558	5.995	2.0e-9	7.0e-8
ENSG00000182256.12	GABRG3	4.578	0.006	6.864	2.966	1.206	5.994	2.1e-9	7.0e-8
ENSG00000134056.11	MRPS36	19.872	39.875	9.871	-1.911	0.588	-5.993	2.1e-9	7.0e-8
ENSG00000115286.19	NDUFS7	151.138	352.855	50.279	-2.787	0.57	-5.986	2.1e-9	7.3e-8
ENSG00000164061.4	BSN	0.975	0.029	1.448	1.251	0.698	5.98	2.2e-9	7.6e-8
ENSG00000160360.12	GPSM1	38.388	1.056	57.054	4.82	0.738	5.979	2.2e-9	7.6e-8
ENSG00000141756.18	FKBP10	259.436	10.43	383.939	5.074	0.614	5.975	2.3e-9	7.8e-8
ENSG00000104823.8	ECH1	210.933	406.205	113.297	-1.833	0.516	-5.971	2.4e-9	8.0e-8
ENSG00000178467.17	P4HTM	3.281	7.035	1.404	-1.741	0.662	-5.965	2.4e-9	8.3e-8
ENSG00000166348.18	USP54	41.6	95.212	14.795	-2.607	0.704	-5.958	2.6e-9	8.6e-8
ENSG00000006576.16	PHTF2	29.545	58.222	15.206	-1.87	0.56	-5.958	2.6e-9	8.7e-8
ENSG00000142621.19	FHAD1	7.246	0.145	10.797	3.365	0.817	5.955	2.6e-9	8.8e-8
ENSG00000129204.16	USP6	5.175	12.828	1.349	-2.557	0.749	-5.955	2.6e-9	8.8e-8
ENSG00000113742.12	CPEB4	10.811	25.008	3.712	-2.465	0.673	-5.954	2.6e-9	8.8e-8
ENSG00000128714.5	HOXD13	6.027	0.021	9.03	3.296	1.23	5.952	2.6e-9	8.9e-8
ENSG00000162755.13	KLHDC9	1.692	4.874	0.101	-2.416	1.308	-5.951	2.7e-9	8.9e-8
ENSG00000140534.13	TICRR	4.683	0.112	6.968	2.841	0.845	5.948	2.7e-9	9.1e-8
ENSG00000107758.15	PPP3CB	74.02	137.992	42.035	-1.691	0.514	-5.947	2.7e-9	9.2e-8
ENSG00000184752.12	NDUFA12	193.163	343.123	118.183	-1.53	0.471	-5.944	2.8e-9	9.3e-8
ENSG00000165028.11	NIPSNAP3B	19.559	38.403	10.136	-1.823	0.591	-5.942	2.8e-9	9.4e-8
ENSG00000111206.12	FOXM1	12.736	0.483	18.863	3.743	0.747	5.94	2.9e-9	9.5e-8
ENSG00000023228.13	NDUFS1	55.247	111.852	26.944	-2.014	0.541	-5.936	2.9e-9	9.7e-8
ENSG00000166295.8	ANAPC16	96.785	185.209	52.573	-1.797	0.486	-5.933	3.0e-9	9.9e-8
ENSG00000184117.11	NIPSNAP1	34.43	2.259	50.516	3.982	0.556	5.929	3.0e-9	1.0e-7
ENSG00000145358.6	DDIT4L	15.745	40.115	3.561	-3.172	0.801	-5.929	3.1e-9	1.0e-7
ENSG00000085552.16	IGSF9	8.753	0.028	13.116	3.78	1.456	5.928	3.1e-9	1.0e-7
ENSG00000139182.13	CLSTN3	39.065	4.053	56.571	3.51	0.519	5.927	3.1e-9	1.0e-7
ENSG00000174371.16	EXO1	5.268	0.155	7.824	2.933	1.067	5.925	3.1e-9	1.0e-7
ENSG00000171365.16	CLCN5	30.992	1.322	45.828	4.334	0.6	5.924	3.1e-9	1.0e-7
ENSG00000173918.14	C1QTNF1	4.621	10.49	1.687	-2.096	0.615	-5.923	3.2e-9	1.0e-7
ENSG00000121671.11	CRY2	29.491	52.937	17.767	-1.523	0.492	-5.923	3.2e-9	1.0e-7
ENSG00000119048.7	UBE2B	172.419	298.259	109.499	-1.437	0.523	-5.92	3.2e-9	1.1e-7
ENSG00000138316.10	ADAMTS14	15.926	0.169	23.804	4.407	1.025	5.919	3.2e-9	1.1e-7
ENSG00000205822.10	TPTE2P6	22.31	0.052	33.438	5.032	1.275	5.918	3.3e-9	1.1e-7
ENSG00000188536.13	HBA2	292.432	836.225	20.536	-5.281	1.11	-5.914	3.3e-9	1.1e-7
ENSG00000183798.4	EMILIN3	76.577	1.319	114.206	5.634	0.887	5.912	3.4e-9	1.1e-7
ENSG00000160949.16	TONSL	11.935	0.267	17.769	3.889	0.856	5.908	3.5e-9	1.1e-7
ENSG00000123560.13	PLP1	28.708	1.739	42.193	3.979	0.563	5.905	3.5e-9	1.2e-7
ENSG00000063854.12	HAGH	62.661	117.893	35.045	-1.722	0.481	-5.904	3.6e-9	1.2e-7
ENSG00000235941.5	HSPA1A	65.917	142.17	27.791	-2.314	0.616	-5.904	3.6e-9	1.2e-7
ENSG00000145685.13	LHFPL2	36.26	1.747	53.517	4.311	0.586	5.89	3.9e-9	1.3e-7
ENSG00000163590.13	PPM1L	1.569	2.927	0.889	-1.056	0.505	-5.889	3.9e-9	1.3e-7
ENSG00000143479.15	DYRK3	10.785	0.497	15.929	3.499	0.667	5.886	4.0e-9	1.3e-7
ENSG00000140374.15	ETFA	120.823	199.504	81.482	-1.281	0.46	-5.885	4.0e-9	1.3e-7
ENSG00000088682.13	COQ9	76.02	149.339	39.36	-1.897	0.572	-5.885	4.0e-9	1.3e-7
ENSG00000188747.8	NOXA1	5.594	12.168	2.307	-1.994	0.606	-5.884	4.0e-9	1.3e-7
ENSG00000198598.6	MMP17	91.888	1.463	137.101	5.809	0.878	5.884	4.0e-9	1.3e-7
ENSG00000274180.1	NATD1	6.992	12.964	4.006	-1.48	0.492	-5.881	4.1e-9	1.3e-7
ENSG00000090924.14	PLEKHG2	71.275	2.117	105.854	5.099	0.754	5.872	4.3e-9	1.4e-7
ENSG00000135318.11	NT5E	3.502	8.022	1.243	-2.008	0.677	-5.87	4.4e-9	1.4e-7
ENSG00000123472.12	ATPAF1	49.073	84.601	31.309	-1.406	0.462	-5.869	4.4e-9	1.4e-7
ENSG00000166803.12	PCLAF	29.766	1.483	43.907	4.177	0.608	5.868	4.4e-9	1.4e-7
ENSG00000166341.7	DCHS1	22.623	1.975	32.948	3.512	0.49	5.866	4.5e-9	1.4e-7
ENSG00000116337.15	AMPD2	47.543	2.752	69.939	4.241	0.551	5.864	4.5e-9	1.5e-7
ENSG00000162062.14	TEDC2	20.249	0.213	30.266	4.688	0.896	5.863	4.6e-9	1.5e-7
ENSG00000117650.12	NEK2	6.96	0.171	10.355	3.278	0.849	5.861	4.6e-9	1.5e-7
ENSG00000172115.8	CYCS	97.726	196.977	48.101	-2.012	0.532	-5.86	4.6e-9	1.5e-7
ENSG00000236236.9	TNXB	7.825	20.306	1.584	-3.043	0.851	-5.859	4.7e-9	1.5e-7
ENSG00000149257.13	SERPINH1	246.5	15.825	361.837	4.431	0.565	5.857	4.7e-9	1.5e-7
ENSG00000188130.13	MAPK12	48.86	112.607	16.987	-2.659	0.653	-5.855	4.8e-9	1.5e-7
ENSG00000132535.18	DLG4	106.207	4.387	157.118	4.875	0.65	5.853	4.8e-9	1.5e-7
ENSG00000156687.10	UNC5D	2.516	0	3.774	2.255	1.762	5.852	4.8e-9	1.5e-7
ENSG00000148120.16	C9orf3	58.947	143.411	16.714	-3.027	0.566	-5.849	5.0e-9	1.6e-7
ENSG00000226074.4	PRSS44	4.382	12.138	0.503	-3.127	0.858	-5.848	5.0e-9	1.6e-7
ENSG00000141447.17	OSBPL1A	30.458	49.749	20.812	-1.218	0.461	-5.843	5.1e-9	1.6e-7
ENSG00000152430.17	BOLL	1.185	2.824	0.365	-1.486	0.986	-5.842	5.1e-9	1.6e-7
ENSG00000270765.5	GAS2L2	0.453	1.313	0.022	-1.178	1.226	-5.84	5.2e-9	1.7e-7
ENSG00000119681.11	LTBP2	6.275	11.602	3.611	-1.45	0.557	-5.839	5.2e-9	1.7e-7
ENSG00000181418.7	DDN	6.413	17.358	0.941	-3.241	0.916	-5.839	5.2e-9	1.7e-7
ENSG00000148737.16	TCF7L2	87.854	6.868	128.347	4.039	0.496	5.839	5.3e-9	1.7e-7
ENSG00000184661.13	CDCA2	3.523	0.077	5.246	2.536	0.963	5.834	5.4e-9	1.7e-7
ENSG00000171503.11	ETFDH	41.15	64.439	29.505	-1.101	0.499	-5.827	5.6e-9	1.8e-7
ENSG00000164683.16	HEY1	122.361	8.003	179.54	4.326	0.569	5.82	5.9e-9	1.8e-7
ENSG00000122756.14	CNTFR	10.8	25.242	3.579	-2.519	0.687	-5.82	5.9e-9	1.8e-7
ENSG00000196368.4	NUDT11	4.445	0.105	6.615	2.785	0.837	5.819	5.9e-9	1.9e-7
ENSG00000167889.12	MGAT5B	7.939	0.033	11.892	3.642	1.178	5.815	6.0e-9	1.9e-7
ENSG00000136811.16	ODF2	31.478	2.391	46.021	3.793	0.5	5.815	6.1e-9	1.9e-7
ENSG00000174871.10	CNIH2	8.494	0.244	12.619	3.452	0.971	5.81	6.2e-9	1.9e-7
ENSG00000068903.19	SIRT2	81.182	161.673	40.937	-1.956	0.561	-5.81	6.2e-9	1.9e-7
ENSG00000188582.8	PAQR9	0.527	1.507	0.036	-1.275	1.13	-5.808	6.3e-9	2.0e-7
ENSG00000134201.10	GSTM5	3.701	9.316	0.894	-2.446	0.619	-5.808	6.3e-9	2.0e-7
ENSG00000130779.19	CLIP1	35.901	74.096	16.803	-2.077	0.581	-5.804	6.5e-9	2.0e-7
ENSG00000140015.19	KCNH5	9.625	0.02	14.427	3.919	1.776	5.802	6.6e-9	2.0e-7
ENSG00000116819.6	TFAP2E	13.934	0.223	20.789	4.155	0.924	5.799	6.7e-9	2.1e-7
ENSG00000102313.8	ITIH6	0.375	0.721	0.203	-0.517	0.893	-5.796	6.8e-9	2.1e-7
ENSG00000204396.10	VWA7	2.77	6.072	1.119	-1.739	0.76	-5.793	6.9e-9	2.1e-7
ENSG00000164900.4	GBX1	2.33	6.513	0.238	-2.601	0.967	-5.792	6.9e-9	2.1e-7
ENSG00000136492.8	BRIP1	6.03	0.591	8.749	2.615	0.771	5.789	7.1e-9	2.2e-7
ENSG00000065518.7	NDUFB4	253.231	480.293	139.7	-1.774	0.497	-5.789	7.1e-9	2.2e-7
ENSG00000277956.4	MAPT	1.039	2.829	0.144	-1.743	0.928	-5.784	7.3e-9	2.2e-7
ENSG00000163923.9	RPL39L	30.171	1.19	44.662	4.382	0.69	5.783	7.3e-9	2.3e-7
ENSG00000167513.8	CDT1	3.475	0.128	5.148	2.446	0.699	5.779	7.5e-9	2.3e-7
ENSG00000030419.16	IKZF2	1.19	3.016	0.276	-1.654	0.733	-5.778	7.6e-9	2.3e-7
ENSG00000106511.5	MEOX2	219.641	9.78	324.572	4.917	0.669	5.774	7.7e-9	2.4e-7
ENSG00000267385.1	AC011498.4	3.925	9.62	1.077	-2.354	0.748	-5.773	7.8e-9	2.4e-7
ENSG00000123570.3	RAB9B	2.525	4.794	1.391	-1.277	0.516	-5.773	7.8e-9	2.4e-7
ENSG00000113368.11	LMNB1	22.406	0.988	33.115	4.101	0.758	5.771	7.9e-9	2.4e-7
ENSG00000225549.3	SELENOKP3	1.61	4.747	0.041	-2.465	1.345	-5.77	7.9e-9	2.4e-7
ENSG00000145945.5	FAM50B	6.803	19.048	0.681	-3.576	1.033	-5.77	7.9e-9	2.4e-7
ENSG00000124920.13	MYRF	3.73	0.132	5.528	2.528	1.01	5.769	8.0e-9	2.4e-7
ENSG00000204991.10	SPIRE2	14.798	0.827	21.783	3.64	0.706	5.763	8.3e-9	2.5e-7
ENSG00000147697.8	GSDMC	2.596	7.34	0.225	-2.767	1.156	-5.762	8.3e-9	2.5e-7
ENSG00000141404.15	GNAL	4.041	7.971	2.076	-1.544	0.629	-5.761	8.3e-9	2.5e-7
ENSG00000077157.21	PPP1R12B	9.648	16.224	6.36	-1.227	0.543	-5.758	8.5e-9	2.6e-7
ENSG00000147684.7	NDUFB9	366.213	781.079	158.78	-2.291	0.61	-5.755	8.7e-9	2.6e-7
ENSG00000075218.18	GTSE1	5.517	0.222	8.164	2.907	0.82	5.755	8.7e-9	2.6e-7
ENSG00000135426.15	TESPA1	54.404	1.901	80.656	4.815	0.648	5.754	8.7e-9	2.6e-7
ENSG00000123124.13	WWP1	28.025	54.963	14.557	-1.847	0.622	-5.749	9.0e-9	2.7e-7
ENSG00000145390.11	USP53	16.164	23.531	12.48	-0.864	0.777	-5.744	9.2e-9	2.8e-7
ENSG00000143924.18	EML4	21.485	1.995	31.231	3.428	0.492	5.743	9.3e-9	2.8e-7
ENSG00000205978.5	NYNRIN	24.363	1.291	35.898	4.009	0.539	5.742	9.4e-9	2.8e-7
ENSG00000121621.6	KIF18A	3.528	0.048	5.268	2.581	0.966	5.733	9.9e-9	3.0e-7
ENSG00000280938.1	TUSC5	0.397	1.171	0.01	-1.104	1.352	-5.73	1.0e-8	3.0e-7
ENSG00000166165.12	CKB	33.221	70.001	14.831	-2.165	0.674	-5.73	1.0e-8	3.0e-7
ENSG00000166619.12	BLCAP	76.422	150.788	39.239	-1.915	0.513	-5.726	1.0e-8	3.1e-7
ENSG00000141668.9	CBLN2	12.295	0	18.442	4.281	1.879	5.723	1.0e-8	3.1e-7
ENSG00000197903.7	HIST1H2BK	150.633	4.379	223.76	5.385	0.769	5.721	1.1e-8	3.2e-7
ENSG00000166959.7	MS4A8	0.904	2.677	0.017	-1.854	1.416	-5.72	1.1e-8	3.2e-7
ENSG00000267809.1	NDUFV2P1	4.069	9.302	1.453	-2.07	0.673	-5.719	1.1e-8	3.2e-7
ENSG00000117385.15	P3H1	75.5	5.644	110.428	4.068	0.501	5.718	1.1e-8	3.2e-7
ENSG00000186628.12	FSD2	10.613	26.567	2.636	-2.922	0.643	-5.718	1.1e-8	3.2e-7
ENSG00000111752.10	PHC1	76.642	5.402	112.262	4.145	0.569	5.717	1.1e-8	3.2e-7
ENSG00000184343.10	SRPK3	45.746	119.519	8.859	-3.612	0.846	-5.717	1.1e-8	3.2e-7
ENSG00000129675.15	ARHGEF6	12.985	31.635	3.66	-2.808	0.754	-5.716	1.1e-8	3.2e-7
ENSG00000154265.15	ABCA5	23.315	39.528	15.208	-1.322	0.547	-5.714	1.1e-8	3.3e-7
ENSG00000176842.14	IRX5	0.717	1.976	0.088	-1.452	1.032	-5.712	1.1e-8	3.3e-7
ENSG00000109832.13	DDX25	12.803	0.067	19.171	4.241	0.964	5.709	1.1e-8	3.4e-7
ENSG00000163491.16	NEK10	6.543	11.776	3.926	-1.375	0.583	-5.704	1.2e-8	3.4e-7
ENSG00000178531.5	CTXN1	16.022	0.114	23.976	4.487	1.134	5.703	1.2e-8	3.5e-7
ENSG00000187527.10	ATP13A5	0.398	0.819	0.188	-0.615	0.954	-5.7	1.2e-8	3.5e-7
ENSG00000177374.12	HIC1	91.183	6.48	133.534	4.169	0.557	5.698	1.2e-8	3.6e-7
ENSG00000188483.7	IER5L	46.017	1.783	68.134	4.635	0.718	5.692	1.3e-8	3.7e-7
ENSG00000181444.12	ZNF467	49.361	2.128	72.977	4.564	0.717	5.685	1.3e-8	3.8e-7
ENSG00000127540.11	UQCR11	220.621	455.432	103.216	-2.131	0.581	-5.685	1.3e-8	3.8e-7
ENSG00000160766.14	GBAP1	18.151	0.629	26.912	4.099	0.837	5.683	1.3e-8	3.9e-7
ENSG00000281500.2	SLC37A4	10.533	21.133	5.232	-1.828	0.542	-5.682	1.3e-8	3.9e-7
ENSG00000121966.6	CXCR4	71.308	1.921	106.002	5.195	0.814	5.676	1.4e-8	4.0e-7
ENSG00000140961.12	OSGIN1	3.535	7.699	1.454	-1.826	0.723	-5.674	1.4e-8	4.1e-7
ENSG00000128578.9	STRIP2	5.095	11.087	2.099	-1.964	0.713	-5.671	1.4e-8	4.1e-7
ENSG00000172348.14	RCAN2	9.675	26.483	1.27	-3.598	0.977	-5.67	1.4e-8	4.1e-7
ENSG00000164136.16	IL15	4.266	8.813	1.992	-1.714	0.632	-5.67	1.4e-8	4.2e-7
ENSG00000116039.12	ATP6V1B1	31.744	0.766	47.234	4.772	0.965	5.668	1.4e-8	4.2e-7
ENSG00000106305.9	AIMP2	32.403	56.546	20.332	-1.432	0.478	-5.667	1.5e-8	4.2e-7
ENSG00000140795.12	MYLK3	11.889	21.881	6.893	-1.536	0.663	-5.664	1.5e-8	4.3e-7
ENSG00000063180.8	CA11	304.836	7.465	453.522	5.747	0.629	5.66	1.5e-8	4.4e-7
ENSG00000104093.13	DMXL2	52.619	5.136	76.361	3.656	0.551	5.657	1.5e-8	4.5e-7
ENSG00000144909.7	OSBPL11	12.167	23.569	6.465	-1.719	0.54	-5.652	1.6e-8	4.6e-7
ENSG00000090971.4	NAT14	46.736	2.022	69.093	4.536	0.635	5.652	1.6e-8	4.6e-7
ENSG00000174586.10	ZNF497	9.926	0.288	14.745	3.612	0.761	5.651	1.6e-8	4.6e-7
ENSG00000047597.6	XK	1.025	2.942	0.066	-1.887	1.165	-5.65	1.6e-8	4.6e-7
ENSG00000105655.18	ISYNA1	174.983	6.396	259.276	5.137	0.675	5.65	1.6e-8	4.6e-7
ENSG00000119471.14	HSDL2	28.803	65.892	10.259	-2.571	0.701	-5.649	1.6e-8	4.6e-7
ENSG00000117054.13	ACADM	81.1	144.735	49.282	-1.535	0.505	-5.646	1.6e-8	4.7e-7
ENSG00000102763.17	VWA8	7.37	11.406	5.351	-0.966	0.464	-5.642	1.7e-8	4.8e-7
ENSG00000189227.5	C15orf61	7.102	12.417	4.444	-1.301	0.596	-5.642	1.7e-8	4.8e-7
ENSG00000141505.11	ASGR1	31.044	0.602	46.266	4.883	1.008	5.64	1.7e-8	4.9e-7
ENSG00000240563.1	L1TD1	114.47	0.024	171.693	7.398	2.077	5.639	1.7e-8	4.9e-7
ENSG00000240024.5	LINC00888	5.981	11.554	3.195	-1.582	0.552	-5.637	1.7e-8	4.9e-7
ENSG00000120910.14	PPP3CC	19.353	38.495	9.782	-1.873	0.526	-5.632	1.8e-8	5.1e-7
ENSG00000159399.9	HK2	13.123	26.706	6.332	-1.918	0.564	-5.632	1.8e-8	5.1e-7
ENSG00000163618.17	CADPS	5.833	0.037	8.731	3.231	1.108	5.628	1.8e-8	5.2e-7
ENSG00000128683.13	GAD1	8.093	0.055	12.113	3.636	1.349	5.627	1.8e-8	5.2e-7
ENSG00000166793.10	YPEL4	7.589	0.28	11.244	3.258	0.843	5.625	1.9e-8	5.3e-7
ENSG00000241935.8	HOGA1	1.964	4.922	0.485	-1.996	0.714	-5.62	1.9e-8	5.4e-7
ENSG00000138136.6	LBX1	5.278	9.536	3.149	-1.344	0.493	-5.62	1.9e-8	5.4e-7
ENSG00000103449.11	SALL1	1.903	0	2.854	1.946	1.636	5.618	1.9e-8	5.5e-7
ENSG00000054654.16	SYNE2	50.528	114.552	18.517	-2.566	0.555	-5.614	2.0e-8	5.6e-7
ENSG00000144488.14	ESPNL	4.038	0.33	5.892	2.373	0.759	5.612	2.0e-8	5.7e-7
ENSG00000120251.19	GRIA2	6.11	0.056	9.137	3.262	1.024	5.609	2.0e-8	5.7e-7
ENSG00000085999.11	RAD54L	20.486	0.489	30.485	4.402	0.95	5.609	2.0e-8	5.8e-7
ENSG00000147853.16	AK3	48.539	81.424	32.096	-1.316	0.452	-5.604	2.1e-8	5.9e-7
ENSG00000182177.14	ASB18	1.76	4.935	0.172	-2.34	0.795	-5.601	2.1e-8	6.0e-7
ENSG00000117118.9	SDHB	102.264	183.216	61.788	-1.553	0.533	-5.6	2.1e-8	6.0e-7
ENSG00000169515.5	CCDC8	26.067	1.692	38.254	3.866	0.585	5.598	2.2e-8	6.1e-7
ENSG00000122966.15	CIT	4.394	0.193	6.494	2.651	0.682	5.597	2.2e-8	6.1e-7
ENSG00000155893.12	PXYLP1	44.044	2.948	64.593	4.054	0.576	5.596	2.2e-8	6.2e-7
ENSG00000148795.6	CYP17A1	8.471	20.043	2.685	-2.513	0.659	-5.595	2.2e-8	6.2e-7
ENSG00000114853.13	ZBTB47	16.05	29.944	9.102	-1.615	0.535	-5.594	2.2e-8	6.2e-7
ENSG00000165821.11	SALL2	22.233	0.935	32.882	4.13	0.734	5.593	2.2e-8	6.2e-7
ENSG00000186648.14	CARMIL3	3.53	0.05	5.27	2.579	0.955	5.588	2.3e-8	6.4e-7
ENSG00000161714.11	PLCD3	25.855	43.552	17.006	-1.307	0.524	-5.588	2.3e-8	6.4e-7
ENSG00000099625.12	CBARP	6.753	0.067	10.096	3.378	0.949	5.586	2.3e-8	6.5e-7
ENSG00000147536.11	GINS4	5.375	0.802	7.662	2.265	0.703	5.586	2.3e-8	6.5e-7
ENSG00000103942.12	HOMER2	23.649	53.497	8.725	-2.486	0.678	-5.585	2.3e-8	6.5e-7
ENSG00000239388.8	ASB14	3.819	6.639	2.41	-1.164	0.591	-5.584	2.3e-8	6.5e-7
ENSG00000158402.18	CDC25C	5.621	0	8.431	3.237	1.645	5.582	2.4e-8	6.6e-7
ENSG00000065989.15	PDE4A	5.69	13.681	1.695	-2.446	0.71	-5.581	2.4e-8	6.6e-7
ENSG00000158473.6	CD1D	22.831	0.793	33.85	4.28	0.746	5.581	2.4e-8	6.6e-7
ENSG00000206314.9	GPSM3	18.591	1.282	27.245	3.63	0.576	5.58	2.4e-8	6.7e-7
ENSG00000069188.16	SDK2	9.402	0.055	14.075	3.838	1.079	5.579	2.4e-8	6.7e-7
ENSG00000140545.14	MFGE8	75.096	162.553	31.367	-2.337	0.593	-5.579	2.4e-8	6.7e-7
ENSG00000157613.10	CREB3L1	22.116	1.624	32.362	3.668	0.571	5.575	2.5e-8	6.8e-7
ENSG00000160691.18	SHC1	267.809	19.559	391.934	4.256	0.581	5.574	2.5e-8	6.9e-7
ENSG00000129195.15	PIMREG	10.003	0.206	14.901	3.721	1.074	5.57	2.5e-8	7.0e-7
ENSG00000144730.17	IL17RD	21.141	1.141	31.141	3.908	0.639	5.57	2.6e-8	7.0e-7
ENSG00000196821.9	C6orf106	29.531	56.08	16.257	-1.726	0.537	-5.57	2.6e-8	7.0e-7
ENSG00000115295.19	CLIP4	20.247	26.573	17.084	-0.609	0.476	-5.569	2.6e-8	7.0e-7
ENSG00000121410.11	A1BG	46.114	2.882	67.731	4.146	0.588	5.567	2.6e-8	7.1e-7
ENSG00000095209.11	TMEM38B	18.366	43.96	5.569	-2.775	0.904	-5.563	2.7e-8	7.3e-7
ENSG00000085662.13	AKR1B1	89.814	184.395	42.523	-2.091	0.6	-5.562	2.7e-8	7.3e-7
ENSG00000170745.11	KCNS3	9.812	23.711	2.862	-2.678	0.782	-5.562	2.7e-8	7.3e-7
ENSG00000206052.10	DOK6	3.466	0.257	5.071	2.272	0.667	5.562	2.7e-8	7.3e-7
ENSG00000146411.5	SLC2A12	0.745	1.816	0.209	-1.22	0.772	-5.561	2.7e-8	7.3e-7
ENSG00000213420.7	GPC2	18.276	0.448	27.189	4.283	0.888	5.557	2.7e-8	7.5e-7
ENSG00000184719.11	RNLS	1.692	4.384	0.346	-2	0.711	-5.557	2.7e-8	7.5e-7
ENSG00000197299.10	BLM	8.707	0.138	12.991	3.62	0.879	5.556	2.8e-8	7.5e-7
ENSG00000116525.13	TRIM62	45.519	0.478	68.039	5.546	0.778	5.555	2.8e-8	7.6e-7
ENSG00000243147.7	MRPL33	209.147	445.986	90.728	-2.285	0.619	-5.553	2.8e-8	7.6e-7
ENSG00000163431.12	LMOD1	13.029	34.47	2.309	-3.422	0.914	-5.545	2.9e-8	8.0e-7
ENSG00000181218.5	HIST3H2A	19.634	0.972	28.965	3.925	0.661	5.537	3.1e-8	8.3e-7
ENSG00000196632.10	WNK3	1.658	0.034	2.469	1.746	0.841	5.531	3.2e-8	8.6e-7
ENSG00000087076.8	HSD17B14	16.331	0.69	24.152	3.895	0.642	5.531	3.2e-8	8.6e-7
ENSG00000113645.14	WWC1	3.581	0.022	5.36	2.638	1.022	5.53	3.2e-8	8.7e-7
ENSG00000150995.18	ITPR1	33.45	2.217	49.066	3.96	0.635	5.529	3.2e-8	8.7e-7
ENSG00000130590.13	SAMD10	10.644	0.333	15.8	3.656	0.828	5.529	3.2e-8	8.7e-7
ENSG00000168273.7	SMIM4	45.05	88.44	23.355	-1.877	0.551	-5.527	3.3e-8	8.8e-7
ENSG00000131788.15	PIAS3	86.998	7.787	126.604	3.86	0.498	5.526	3.3e-8	8.8e-7
ENSG00000176928.5	GCNT4	0.292	0.737	0.07	-0.7	0.815	-5.526	3.3e-8	8.8e-7
ENSG00000247596.8	TWF2	68.312	136.301	34.317	-1.959	0.583	-5.523	3.3e-8	8.9e-7
ENSG00000135502.17	SLC26A10	61.343	1.26	91.384	5.353	0.868	5.523	3.3e-8	8.9e-7
ENSG00000166886.12	NAB2	39.836	2.674	58.417	4.016	0.548	5.521	3.4e-8	9.1e-7
ENSG00000067715.13	SYT1	2.728	0.165	4.01	2.105	0.853	5.517	3.4e-8	9.2e-7
ENSG00000177542.10	SLC25A22	26.971	1.221	39.846	4.201	0.74	5.517	3.4e-8	9.2e-7
ENSG00000273850.3	PPP2R3B	51.246	125.264	14.237	-3.051	0.691	-5.516	3.5e-8	9.2e-7
ENSG00000078967.12	UBE2D4	43.099	62.629	33.334	-0.89	0.524	-5.516	3.5e-8	9.2e-7
ENSG00000204624.7	DISP3	8.883	0.006	13.321	3.831	1.772	5.514	3.5e-8	9.3e-7
ENSG00000139970.16	RTN1	21.814	1.061	32.191	4.01	0.611	5.513	3.5e-8	9.4e-7
ENSG00000101412.12	E2F1	10.567	0.49	15.606	3.478	0.692	5.512	3.5e-8	9.4e-7
ENSG00000138653.9	NDST4	3.836	0.013	5.747	2.735	1.286	5.51	3.6e-8	9.5e-7
ENSG00000167393.17	PPP2R3B	8.261	18.382	3.201	-2.206	0.628	-5.51	3.6e-8	9.5e-7
ENSG00000277400.1	AC145212.1	11.895	0.762	17.461	3.389	0.613	5.509	3.6e-8	9.6e-7
ENSG00000120265.16	PCMT1	55.735	94.938	36.134	-1.369	0.57	-5.507	3.6e-8	9.6e-7
ENSG00000138180.15	CEP55	4.235	0.026	6.34	2.839	1.159	5.504	3.7e-8	9.8e-7
ENSG00000100412.15	ACO2	84.276	181.874	35.477	-2.326	0.687	-5.499	3.8e-8	1.0e-6
ENSG00000125869.9	LAMP5	12.265	0.036	18.38	4.225	1.461	5.497	3.9e-8	1.0e-6
ENSG00000183230.16	CTNNA3	2.204	5.993	0.31	-2.416	1.114	-5.497	3.9e-8	1.0e-6
ENSG00000141401.11	IMPA2	44.64	95.095	19.413	-2.235	0.704	-5.494	3.9e-8	1.0e-6
ENSG00000173085.14	COQ2	10.237	20.335	5.188	-1.786	0.569	-5.489	4.0e-8	1.1e-6
ENSG00000074047.21	GLI2	10.009	0.786	14.621	3.129	0.573	5.489	4.1e-8	1.1e-6
ENSG00000243696.4	AC006254.1	5.428	12.267	2.008	-2.141	0.685	-5.486	4.1e-8	1.1e-6
ENSG00000103642.11	LACTB	9.528	17.011	5.787	-1.408	0.549	-5.485	4.1e-8	1.1e-6
ENSG00000126822.16	PLEKHG3	31.663	2.603	46.194	3.711	0.572	5.484	4.2e-8	1.1e-6
ENSG00000103994.16	ZNF106	50.25	108.885	20.933	-2.325	0.69	-5.483	4.2e-8	1.1e-6
ENSG00000101447.14	FAM83D	5.134	0.046	7.678	3.053	1.173	5.483	4.2e-8	1.1e-6
ENSG00000177990.11	DPY19L2	29.601	2.483	43.16	3.664	0.63	5.482	4.2e-8	1.1e-6
ENSG00000099365.10	STX1B	5.88	0.114	8.763	3.132	0.838	5.482	4.2e-8	1.1e-6
ENSG00000085840.12	ORC1	4.112	0.06	6.138	2.752	1.023	5.481	4.2e-8	1.1e-6
ENSG00000140740.10	UQCRC2	251.777	275.967	239.682	-0.203	0.444	-5.478	4.3e-8	1.1e-6
ENSG00000178980.14	SELENOW	735.937	1585.51	311.153	-2.346	0.639	-5.478	4.3e-8	1.1e-6
ENSG00000082641.15	NFE2L1	151.075	323.407	64.909	-2.299	0.621	-5.478	4.3e-8	1.1e-6
ENSG00000159423.16	ALDH4A1	18.284	35.264	9.795	-1.748	0.607	-5.477	4.3e-8	1.1e-6
ENSG00000107771.16	CCSER2	12.327	23.972	6.504	-1.735	0.547	-5.477	4.3e-8	1.1e-6
ENSG00000184445.11	KNTC1	32.006	2.31	46.853	3.854	0.582	5.476	4.4e-8	1.1e-6
ENSG00000215018.9	COL28A1	3.503	6.694	1.908	-1.404	0.675	-5.47	4.5e-8	1.2e-6
ENSG00000128311.13	TST	16.727	37.912	6.134	-2.447	0.705	-5.466	4.6e-8	1.2e-6
ENSG00000186432.8	KPNA4	14.664	24.851	9.57	-1.29	0.485	-5.465	4.6e-8	1.2e-6
ENSG00000144357.16	UBR3	28.038	54.547	14.784	-1.815	0.588	-5.46	4.8e-8	1.2e-6
ENSG00000178449.8	COX14	87.105	196.985	32.166	-2.578	0.698	-5.458	4.8e-8	1.2e-6
ENSG00000187801.14	ZFP69B	6.694	0.199	9.941	3.19	0.828	5.458	4.8e-8	1.2e-6
ENSG00000276180.1	HIST1H4I	21.08	1.112	31.063	3.924	0.659	5.458	4.8e-8	1.2e-6
ENSG00000136143.15	SUCLA2	46.025	80.729	28.673	-1.462	0.559	-5.458	4.8e-8	1.2e-6
ENSG00000168243.10	GNG4	6.344	0.047	9.493	3.325	1.033	5.456	4.9e-8	1.3e-6
ENSG00000133985.2	TTC9	1.169	2.539	0.484	-1.254	0.662	-5.456	4.9e-8	1.3e-6
ENSG00000127564.16	PKMYT1	17.831	0.633	26.429	4.07	0.956	5.452	5.0e-8	1.3e-6
ENSG00000111218.11	PRMT8	6.284	0	9.427	3.382	1.832	5.448	5.1e-8	1.3e-6
ENSG00000134222.16	PSRC1	20.421	0.681	30.291	4.219	0.781	5.446	5.1e-8	1.3e-6
ENSG00000063438.16	AHRR	9.624	0.083	14.395	3.829	0.906	5.446	5.1e-8	1.3e-6
ENSG00000143344.15	RGL1	36.087	3.629	52.316	3.526	0.491	5.445	5.2e-8	1.3e-6
ENSG00000184489.11	PTP4A3	43.168	105.581	11.962	-3.04	0.792	-5.444	5.2e-8	1.3e-6
ENSG00000150893.10	FREM2	0.695	1.595	0.245	-1.059	0.751	-5.444	5.2e-8	1.3e-6
ENSG00000175606.10	TMEM70	26.104	56.522	10.896	-2.274	0.607	-5.443	5.2e-8	1.3e-6
ENSG00000110900.14	TSPAN11	21.268	0.519	31.643	4.426	0.842	5.44	5.3e-8	1.4e-6
ENSG00000136231.13	IGF2BP3	3.552	0.055	5.3	2.578	1.027	5.438	5.4e-8	1.4e-6
ENSG00000144644.14	GADL1	3.056	6.378	1.395	-1.623	0.583	-5.438	5.4e-8	1.4e-6
ENSG00000110492.15	MDK	344.49	10.024	511.722	5.539	0.84	5.437	5.4e-8	1.4e-6
ENSG00000225813.1	AC009299.1	34.743	0.07	52.08	5.632	1.582	5.437	5.4e-8	1.4e-6
ENSG00000240771.6	ARHGEF25	84.35	6.994	123.028	3.956	0.534	5.434	5.5e-8	1.4e-6
ENSG00000164237.8	CMBL	57.631	109.426	31.734	-1.754	0.55	-5.434	5.5e-8	1.4e-6
ENSG00000206557.5	TRIM71	1.678	0.008	2.514	1.802	1.366	5.433	5.5e-8	1.4e-6
ENSG00000242335.8	CFB	1.206	3.436	0.091	-2.024	1.208	-5.43	5.6e-8	1.4e-6
ENSG00000198901.13	PRC1	33.186	3.169	48.195	3.561	0.643	5.429	5.7e-8	1.4e-6
ENSG00000132561.13	MATN2	214.048	4.869	318.638	5.767	0.86	5.428	5.7e-8	1.4e-6
ENSG00000144354.13	CDCA7	24.232	2.275	35.21	3.467	0.515	5.425	5.8e-8	1.5e-6
ENSG00000179091.4	CYC1	147.357	282.117	79.977	-1.806	0.539	-5.425	5.8e-8	1.5e-6
ENSG00000183111.11	ARHGEF37	2.661	3.437	2.273	-0.439	0.549	-5.421	5.9e-8	1.5e-6
ENSG00000137393.9	RNF144B	6.137	15.778	1.317	-2.857	0.875	-5.418	6.0e-8	1.5e-6
ENSG00000197283.16	SYNGAP1	107.196	0.687	160.451	6.581	0.758	5.41	6.3e-8	1.6e-6
ENSG00000076555.15	ACACB	14.933	24.656	10.071	-1.213	0.548	-5.407	6.4e-8	1.6e-6
ENSG00000101400.5	SNTA1	52.489	131.382	13.043	-3.237	0.837	-5.406	6.4e-8	1.6e-6
ENSG00000183072.9	NKX2-5	5.424	0.044	8.114	3.126	1.195	5.403	6.6e-8	1.6e-6
ENSG00000084764.10	MAPRE3	24.276	41.432	15.698	-1.345	0.499	-5.403	6.6e-8	1.6e-6
ENSG00000139625.12	MAP3K12	65.467	3.92	96.24	4.305	0.667	5.4	6.7e-8	1.7e-6
ENSG00000160539.5	PLPP7	36.116	87.165	10.591	-2.927	0.786	-5.398	6.7e-8	1.7e-6
ENSG00000108001.13	EBF3	59.258	6.168	85.803	3.598	0.489	5.395	6.9e-8	1.7e-6
ENSG00000189043.9	NDUFA4	167.278	380.413	60.71	-2.628	0.754	-5.394	6.9e-8	1.7e-6
ENSG00000167971.15	CASKIN1	8.485	0.037	12.709	3.724	1.02	5.393	6.9e-8	1.7e-6
ENSG00000125733.17	TRIP10	108.454	176.845	74.259	-1.241	0.559	-5.391	7.0e-8	1.7e-6
ENSG00000130988.12	RGN	2.874	7.185	0.718	-2.252	0.868	-5.389	7.1e-8	1.8e-6
ENSG00000123975.4	CKS2	64.369	4.964	94.071	3.995	0.565	5.386	7.2e-8	1.8e-6
ENSG00000007933.12	FMO3	3.249	7.112	1.317	-1.808	0.818	-5.383	7.3e-8	1.8e-6
ENSG00000156026.14	MCU	17.098	27.997	11.649	-1.197	0.503	-5.383	7.3e-8	1.8e-6
ENSG00000105642.15	KCNN1	4.132	0.062	6.167	2.754	0.921	5.374	7.7e-8	1.9e-6
ENSG00000135821.18	GLUL	253.653	552.296	104.332	-2.393	0.597	-5.373	7.7e-8	1.9e-6
ENSG00000047849.21	MAP4	100.55	156.519	72.566	-1.098	0.474	-5.369	7.9e-8	2.0e-6
ENSG00000156265.15	MAP3K7CL	16.269	38.539	5.133	-2.689	0.787	-5.367	8.0e-8	2.0e-6
ENSG00000187323.11	DCC	3.527	1.349	4.616	1.258	0.767	5.366	8.1e-8	2.0e-6
ENSG00000149260.15	CAPN5	15.929	1.492	23.147	3.276	0.539	5.364	8.2e-8	2.0e-6
ENSG00000142731.10	PLK4	6.648	0.131	9.906	3.269	0.789	5.362	8.2e-8	2.0e-6
ENSG00000137868.18	STRA6	6.221	0.085	9.289	3.245	1.04	5.358	8.4e-8	2.1e-6
ENSG00000162104.9	ADCY9	6.329	11.825	3.582	-1.485	0.64	-5.357	8.5e-8	2.1e-6
ENSG00000145632.14	PLK2	127.805	6.726	188.345	4.615	0.608	5.354	8.6e-8	2.1e-6
ENSG00000105011.8	ASF1B	4.827	0.199	7.142	2.764	0.825	5.344	9.1e-8	2.2e-6
ENSG00000196220.15	SRGAP3	9.954	1.534	14.165	2.581	0.517	5.342	9.2e-8	2.3e-6
ENSG00000111911.6	HINT3	15.583	33.552	6.598	-2.185	0.663	-5.341	9.2e-8	2.3e-6
ENSG00000215845.10	TSTD1	9.129	23.27	2.059	-2.988	0.829	-5.339	9.4e-8	2.3e-6
ENSG00000172780.16	RAB43	9.004	1.279	12.866	2.605	0.653	5.338	9.4e-8	2.3e-6
ENSG00000084754.11	HADHA	78.877	128.846	53.892	-1.242	0.47	-5.338	9.4e-8	2.3e-6
ENSG00000234175.1	AL355355.2	14.232	40.118	1.288	-4.167	1.144	-5.337	9.5e-8	2.3e-6
ENSG00000100442.10	FKBP3	157.929	252.642	110.573	-1.185	0.466	-5.335	9.6e-8	2.3e-6
ENSG00000160963.13	COL26A1	5.433	0.121	8.089	3.019	1.549	5.332	9.7e-8	2.4e-6
ENSG00000132388.12	UBE2G1	58.689	118.426	28.82	-2.002	0.577	-5.331	9.8e-8	2.4e-6
ENSG00000116035.3	VAX2	9.19	0.506	13.532	3.27	0.751	5.33	9.8e-8	2.4e-6
ENSG00000197461.13	PDGFA	7.964	17.074	3.409	-2.036	0.55	-5.328	1.0e-7	2.4e-6
ENSG00000117477.12	CCDC181	5.704	0.217	8.447	2.957	0.798	5.327	1.0e-7	2.4e-6
ENSG00000131791.7	PRKAB2	15.266	27.511	9.143	-1.491	0.562	-5.325	1.0e-7	2.4e-6
ENSG00000148411.7	NACC2	2.36	4.667	1.206	-1.361	0.586	-5.325	1.0e-7	2.5e-6
ENSG00000124496.12	TRERF1	9.83	0.627	14.431	3.245	0.622	5.324	1.0e-7	2.5e-6
ENSG00000119715.15	ESRRB	2.505	5.633	0.941	-1.773	0.68	-5.323	1.0e-7	2.5e-6
ENSG00000274070.1	CASTOR2	6.596	13.011	3.389	-1.675	0.603	-5.32	1.0e-7	2.5e-6
ENSG00000144061.12	NPHP1	13.869	26.62	7.493	-1.701	0.563	-5.317	1.1e-7	2.6e-6
ENSG00000138443.15	ABI2	48.239	4.664	70.027	3.649	0.456	5.315	1.1e-7	2.6e-6
ENSG00000092096.16	SLC22A17	49.44	2.28	73.02	4.496	0.654	5.314	1.1e-7	2.6e-6
ENSG00000178498.15	DTX3	82.993	5.386	121.797	4.265	0.626	5.312	1.1e-7	2.6e-6
ENSG00000204969.6	PCDHA2	2.308	0	3.462	2.158	1.782	5.309	1.1e-7	2.6e-6
ENSG00000149243.15	KLHL35	18.434	0.246	27.528	4.518	1.046	5.309	1.1e-7	2.7e-6
ENSG00000159164.9	SV2A	3.332	0.183	4.907	2.32	0.728	5.309	1.1e-7	2.7e-6
ENSG00000157680.15	DGKI	1.209	0.117	1.755	1.302	1.158	5.306	1.1e-7	2.7e-6
ENSG00000154864.12	PIEZO2	8.132	1.179	11.608	2.533	0.863	5.304	1.1e-7	2.7e-6
ENSG00000107864.14	CPEB3	3.627	8.323	1.279	-2.033	0.718	-5.304	1.1e-7	2.7e-6
ENSG00000165312.6	OTUD1	8.84	17.468	4.525	-1.741	0.589	-5.303	1.1e-7	2.7e-6
ENSG00000263528.7	IKBKE	5.882	0.194	8.727	3.026	0.73	5.303	1.1e-7	2.7e-6
ENSG00000108551.4	RASD1	2.976	5.831	1.549	-1.422	0.592	-5.303	1.1e-7	2.7e-6
ENSG00000176438.12	SYNE3	0.945	1.479	0.678	-0.563	0.577	-5.299	1.2e-7	2.8e-6
ENSG00000173638.18	SLC19A1	7.302	0.544	10.681	2.919	0.574	5.299	1.2e-7	2.8e-6
ENSG00000275724.1	AC012314.9	512.229	989.423	273.631	-1.851	0.587	-5.292	1.2e-7	2.9e-6
ENSG00000088826.17	SMOX	26.576	2.02	38.855	3.722	0.553	5.291	1.2e-7	2.9e-6
ENSG00000152601.17	MBNL1	55.041	116.089	24.516	-2.198	0.666	-5.289	1.2e-7	2.9e-6
ENSG00000154358.20	OBSCN	148.178	220.4	112.067	-0.969	0.66	-5.285	1.3e-7	3.0e-6
ENSG00000121152.9	NCAPH	6.204	0.213	9.199	3.072	0.794	5.284	1.3e-7	3.0e-6
ENSG00000147123.10	NDUFB11	104.596	201.756	56.016	-1.83	0.572	-5.282	1.3e-7	3.0e-6
ENSG00000006757.11	PNPLA4	16.168	34.202	7.151	-2.111	0.555	-5.28	1.3e-7	3.1e-6
ENSG00000144355.14	DLX1	4.208	0.134	6.245	2.675	0.963	5.279	1.3e-7	3.1e-6
ENSG00000112319.18	EYA4	5.967	14.744	1.579	-2.61	0.78	-5.278	1.3e-7	3.1e-6
ENSG00000198722.14	UNC13B	10.676	18.457	6.786	-1.321	0.502	-5.278	1.3e-7	3.1e-6
ENSG00000166448.14	TMEM130	3.727	0.087	5.548	2.591	1.209	5.277	1.3e-7	3.1e-6
ENSG00000120327.6	PCDHB14	8.774	1.007	12.658	2.767	0.544	5.277	1.3e-7	3.1e-6
ENSG00000258818.3	RNASE4	8.274	16.643	4.09	-1.793	0.577	-5.273	1.3e-7	3.2e-6
ENSG00000215187.10	FAM166B	55.798	136.554	15.42	-3.066	0.853	-5.272	1.3e-7	3.2e-6
ENSG00000285150.1	AC140062.1	1.404	4.093	0.06	-2.265	1.464	-5.272	1.3e-7	3.2e-6
ENSG00000165923.15	AGBL2	9.155	0.721	13.372	3.062	0.856	5.27	1.4e-7	3.2e-6
ENSG00000126524.9	SBDS	84.962	173.791	40.547	-2.073	0.63	-5.27	1.4e-7	3.2e-6
ENSG00000078804.12	TP53INP2	7.27	14.094	3.858	-1.636	0.593	-5.266	1.4e-7	3.3e-6
ENSG00000248290.1	TNXA	1.259	3.392	0.193	-1.88	1.018	-5.266	1.4e-7	3.3e-6
ENSG00000128656.13	CHN1	35.883	1.287	53.18	4.566	0.82	5.265	1.4e-7	3.3e-6
ENSG00000254402.6	LRRC24	10.963	0.229	16.33	3.817	0.943	5.264	1.4e-7	3.3e-6
ENSG00000070031.3	SCT	10.199	27.784	1.407	-3.58	1.073	-5.264	1.4e-7	3.3e-6
ENSG00000138162.18	TACC2	90.001	137.962	66.021	-1.052	0.622	-5.26	1.4e-7	3.4e-6
ENSG00000139289.13	PHLDA1	14.396	0.679	21.255	3.728	0.684	5.259	1.5e-7	3.4e-6
ENSG00000196139.13	AKR1C3	17.251	29.144	11.304	-1.293	0.526	-5.258	1.5e-7	3.4e-6
ENSG00000160712.12	IL6R	4.235	9.218	1.744	-1.897	0.774	-5.258	1.5e-7	3.4e-6
ENSG00000154723.12	ATP5PF	270.531	523.023	144.285	-1.851	0.54	-5.257	1.5e-7	3.4e-6
ENSG00000105419.17	MEIS3	86.845	2.409	129.064	5.254	0.858	5.256	1.5e-7	3.4e-6
ENSG00000187699.10	C2orf88	4.537	4.905	4.353	-0.142	0.541	-5.255	1.5e-7	3.5e-6
ENSG00000071575.11	TRIB2	54.886	5.923	79.367	3.537	0.473	5.254	1.5e-7	3.5e-6
ENSG00000198771.10	RCSD1	14.105	32.507	4.903	-2.505	0.788	-5.245	1.6e-7	3.6e-6
ENSG00000005448.16	WDR54	21.228	1.396	31.143	3.746	0.622	5.243	1.6e-7	3.7e-6
ENSG00000123219.12	CENPK	8.623	0.676	12.596	3.02	0.672	5.24	1.6e-7	3.7e-6
ENSG00000182749.5	PAQR7	17.823	0.963	26.253	3.795	0.686	5.24	1.6e-7	3.7e-6
ENSG00000139973.16	SYT16	0.8	0.123	1.138	0.929	0.769	5.239	1.6e-7	3.7e-6
ENSG00000163347.5	CLDN1	15.656	0.616	23.177	3.903	0.758	5.239	1.6e-7	3.7e-6
ENSG00000111602.11	TIMELESS	15.804	1.134	23.139	3.5	0.612	5.237	1.6e-7	3.8e-6
ENSG00000152127.8	MGAT5	24.034	1.083	35.51	4.131	0.724	5.236	1.6e-7	3.8e-6
ENSG00000113448.18	PDE4D	10.358	19.897	5.588	-1.665	0.649	-5.236	1.6e-7	3.8e-6
ENSG00000047634.14	SCML1	7.237	13.212	4.25	-1.437	0.548	-5.234	1.7e-7	3.8e-6
ENSG00000148123.14	PLPPR1	3.892	0	5.838	2.774	1.749	5.234	1.7e-7	3.8e-6
ENSG00000005379.15	TSPOAP1	3.935	7.434	2.185	-1.405	0.72	-5.234	1.7e-7	3.8e-6
ENSG00000152467.9	ZSCAN1	13.425	0	20.137	4.402	1.753	5.233	1.7e-7	3.8e-6
ENSG00000088325.15	TPX2	13.411	0.585	19.825	3.716	0.733	5.233	1.7e-7	3.8e-6
ENSG00000116604.17	MEF2D	39.939	58.934	30.441	-0.931	0.463	-5.231	1.7e-7	3.9e-6
ENSG00000152580.8	IGSF10	8.04	0.415	11.853	3.183	0.642	5.23	1.7e-7	3.9e-6
ENSG00000175928.5	LRRN1	5.232	10.083	2.806	-1.542	0.577	-5.228	1.7e-7	3.9e-6
ENSG00000010219.13	DYRK4	10.907	20.908	5.907	-1.665	0.607	-5.227	1.7e-7	3.9e-6
ENSG00000128573.24	FOXP2	6.776	5.603	7.362	0.341	0.517	-5.226	1.7e-7	4.0e-6
ENSG00000129965.15	INS-IGF2	11.565	0.32	17.188	3.784	0.875	5.226	1.7e-7	4.0e-6
ENSG00000149972.10	CNTN5	1.908	0.028	2.848	1.904	1.046	5.222	1.8e-7	4.0e-6
ENSG00000168528.11	SERINC2	4.103	8.741	1.785	-1.807	0.663	-5.221	1.8e-7	4.1e-6
ENSG00000127774.6	EMC6	56.308	102.886	33.019	-1.611	0.548	-5.22	1.8e-7	4.1e-6
ENSG00000138135.6	CH25H	8.77	0.089	13.111	3.696	1.156	5.22	1.8e-7	4.1e-6
ENSG00000183496.5	MEX3B	13.273	1.025	19.398	3.332	0.595	5.22	1.8e-7	4.1e-6
ENSG00000126218.11	F10	4.88	11.056	1.792	-2.111	0.746	-5.219	1.8e-7	4.1e-6
ENSG00000183628.12	DGCR6	15.849	29.053	9.247	-1.552	0.594	-5.215	1.8e-7	4.2e-6
ENSG00000093009.9	CDC45	19.638	0.014	29.45	4.908	1.612	5.213	1.9e-7	4.2e-6
ENSG00000108528.13	SLC25A11	58.833	112.236	32.131	-1.773	0.552	-5.211	1.9e-7	4.3e-6
ENSG00000281518.6	FOXO6	0.844	1.918	0.307	-1.159	0.738	-5.207	1.9e-7	4.3e-6
ENSG00000172594.12	SMPDL3A	11.948	20.354	7.745	-1.288	0.499	-5.207	1.9e-7	4.4e-6
ENSG00000167863.11	ATP5PD	371.956	696.217	209.825	-1.726	0.533	-5.206	1.9e-7	4.4e-6
ENSG00000213903.8	LTB4R	45.562	1.014	67.836	5.095	0.884	5.205	1.9e-7	4.4e-6
ENSG00000092853.13	CLSPN	7.477	0.123	11.155	3.436	1.072	5.204	2.0e-7	4.4e-6
ENSG00000039537.13	C6	0.612	1.62	0.108	-1.242	1.132	-5.203	2.0e-7	4.4e-6
ENSG00000068024.16	HDAC4	15.999	30.352	8.822	-1.674	0.546	-5.199	2.0e-7	4.5e-6
ENSG00000157445.14	CACNA2D3	3.533	6.663	1.968	-1.368	0.588	-5.197	2.0e-7	4.6e-6
ENSG00000139734.17	DIAPH3	1.617	0.046	2.403	1.702	1.028	5.195	2.0e-7	4.6e-6
ENSG00000120306.10	CYSTM1	64.103	145.062	23.624	-2.568	0.681	-5.193	2.1e-7	4.6e-6
ENSG00000104356.10	POP1	6.219	0.731	8.964	2.525	0.488	5.184	2.2e-7	4.9e-6
ENSG00000103485.17	QPRT	42.873	4.128	62.245	3.625	0.533	5.183	2.2e-7	4.9e-6
ENSG00000066248.14	NGEF	17.116	1.892	24.728	3.153	0.645	5.182	2.2e-7	4.9e-6
ENSG00000167535.7	CACNB3	35.258	1.509	52.133	4.404	0.726	5.175	2.3e-7	5.1e-6
ENSG00000122359.17	ANXA11	68.544	92.883	56.374	-0.71	0.557	-5.173	2.3e-7	5.2e-6
ENSG00000158008.9	EXTL1	5.225	9.331	3.172	-1.308	0.583	-5.169	2.4e-7	5.3e-6
ENSG00000265158.1	LRRC37A7P	0.981	2.414	0.264	-1.433	0.853	-5.165	2.4e-7	5.4e-6
ENSG00000161267.11	BDH1	10.134	23.386	3.508	-2.435	0.768	-5.165	2.4e-7	5.4e-6
ENSG00000003249.13	DBNDD1	4.468	10.693	1.355	-2.312	0.768	-5.163	2.4e-7	5.4e-6
ENSG00000101115.12	SALL4	6.309	0.055	9.435	3.306	1.048	5.163	2.4e-7	5.4e-6
ENSG00000065485.19	PDIA5	28.555	2.82	41.423	3.473	0.563	5.163	2.4e-7	5.4e-6
ENSG00000198585.11	NUDT16	3.741	6.829	2.197	-1.292	0.578	-5.162	2.4e-7	5.4e-6
ENSG00000122824.10	NUDT10	4.109	0.16	6.084	2.61	0.81	5.162	2.4e-7	5.4e-6
ENSG00000137806.8	NDUFAF1	26.054	43.052	17.555	-1.247	0.454	-5.162	2.4e-7	5.4e-6
ENSG00000105894.11	PTN	61.202	2.854	90.377	4.567	0.74	5.158	2.5e-7	5.5e-6
ENSG00000155966.13	AFF2	0.911	0.026	1.354	1.199	0.903	5.158	2.5e-7	5.6e-6
ENSG00000107130.9	NCS1	8.596	0.536	12.626	3.149	0.646	5.156	2.5e-7	5.6e-6
ENSG00000183625.14	CCR3	5.535	14.827	0.889	-3.067	0.881	-5.156	2.5e-7	5.6e-6
ENSG00000008513.14	ST3GAL1	11.909	19.545	8.091	-1.176	0.542	-5.154	2.5e-7	5.6e-6
ENSG00000175701.10	SMIM37	296.211	666.472	111.081	-2.574	0.651	-5.154	2.6e-7	5.6e-6
ENSG00000172493.20	AFF1	29.731	80.132	4.53	-3.875	0.59	-5.154	2.6e-7	5.6e-6
ENSG00000105204.13	DYRK1B	42.63	78.461	24.715	-1.628	0.574	-5.154	2.6e-7	5.6e-6
ENSG00000266524.2	GDF10	1.215	2.741	0.452	-1.366	0.73	-5.153	2.6e-7	5.7e-6
ENSG00000108819.10	PPP1R9B	65.089	7.995	93.636	3.395	0.454	5.151	2.6e-7	5.7e-6
ENSG00000136059.14	VILL	21.184	1.343	31.105	3.776	0.642	5.149	2.6e-7	5.8e-6
ENSG00000067445.20	TRO	134.978	9	197.967	4.314	0.517	5.149	2.6e-7	5.8e-6
ENSG00000154646.8	TMPRSS15	12.728	0.006	19.089	4.32	1.892	5.147	2.6e-7	5.8e-6
ENSG00000175662.17	TOM1L2	16.376	24.008	12.56	-0.883	0.476	-5.147	2.7e-7	5.8e-6
ENSG00000186684.12	CYP27C1	9.161	0.152	13.665	3.67	1.019	5.147	2.7e-7	5.8e-6
ENSG00000174939.10	ASPHD1	6.423	0.044	9.613	3.346	1.258	5.145	2.7e-7	5.9e-6
ENSG00000187151.7	ANGPTL5	0.375	1.092	0.017	-1.041	1.383	-5.141	2.7e-7	6.0e-6
ENSG00000168143.8	FAM83B	0.192	0.565	0.006	-0.639	1.476	-5.136	2.8e-7	6.2e-6
ENSG00000093167.17	LRRFIP2	29.176	48.145	19.692	-1.248	0.516	-5.132	2.9e-7	6.3e-6
ENSG00000026559.13	KCNG1	5.17	0.104	7.703	2.979	0.786	5.131	2.9e-7	6.3e-6
ENSG00000119787.13	ATL2	27.39	39.956	21.107	-0.89	0.465	-5.13	2.9e-7	6.4e-6
ENSG00000158158.11	CNNM4	8.182	15.29	4.628	-1.533	0.462	-5.129	2.9e-7	6.4e-6
ENSG00000273802.2	HIST1H2BG	9.44	0.033	14.144	3.873	1.427	5.129	2.9e-7	6.4e-6
ENSG00000284967.1	AC270285.2	33.41	65.051	17.59	-1.829	0.616	-5.128	2.9e-7	6.4e-6
ENSG00000174669.11	SLC29A2	31.534	71.254	11.674	-2.511	0.755	-5.127	2.9e-7	6.4e-6
ENSG00000204970.9	PCDHA1	1.193	0	1.789	1.48	1.614	5.127	3.0e-7	6.4e-6
ENSG00000177425.10	PAWR	19.223	1.621	28.024	3.469	0.497	5.125	3.0e-7	6.5e-6
ENSG00000141905.18	NFIC	50.391	85.12	33.026	-1.34	0.469	-5.122	3.0e-7	6.6e-6
ENSG00000231512.6	AL606534.2	1.325	3.976	0	-2.315	1.576	-5.121	3.0e-7	6.6e-6
ENSG00000106723.16	SPIN1	46.573	5.329	67.195	3.43	0.481	5.121	3.0e-7	6.6e-6
ENSG00000136928.6	GABBR2	1.913	0.086	2.827	1.817	0.802	5.118	3.1e-7	6.7e-6
ENSG00000181588.16	MEX3D	20.614	1.342	30.25	3.738	0.624	5.113	3.2e-7	6.9e-6
ENSG00000251493.4	FOXD1	7.286	0.326	10.766	3.15	0.896	5.112	3.2e-7	6.9e-6
ENSG00000184304.14	PRKD1	12.2	1.281	17.659	3.032	0.506	5.109	3.2e-7	7.0e-6
ENSG00000197275.13	RAD54B	13.341	1.317	19.354	3.135	0.595	5.107	3.3e-7	7.1e-6
ENSG00000138190.16	EXOC6	14.468	24.748	9.328	-1.318	0.583	-5.105	3.3e-7	7.1e-6
ENSG00000170312.15	CDK1	16.313	0.807	24.066	3.794	0.806	5.1	3.4e-7	7.3e-6
ENSG00000147485.12	PXDNL	0.433	0.904	0.197	-0.67	0.77	-5.099	3.4e-7	7.4e-6
ENSG00000129951.18	PLPPR3	2.961	0	4.441	2.444	1.674	5.098	3.4e-7	7.4e-6
ENSG00000188573.7	FBLL1	4.761	0.042	7.12	2.962	1.234	5.098	3.4e-7	7.4e-6
ENSG00000147381.11	MAGEA4	5.542	0	8.314	3.219	1.742	5.096	3.5e-7	7.5e-6
ENSG00000144857.14	BOC	92.022	8.433	133.816	3.837	0.559	5.094	3.5e-7	7.5e-6
ENSG00000185090.14	MANEAL	0.874	1.783	0.419	-0.971	0.697	-5.093	3.5e-7	7.6e-6
ENSG00000141510.16	TP53	47.96	4.366	69.757	3.721	0.565	5.091	3.6e-7	7.6e-6
ENSG00000244734.4	HBB	194.081	497.518	42.363	-3.523	1.097	-5.091	3.6e-7	7.7e-6
ENSG00000260644.6	HERC2P5	14.577	0.286	21.723	4.143	1.017	5.086	3.7e-7	7.9e-6
ENSG00000149633.11	KIAA1755	56.289	4.164	82.352	4.013	0.617	5.084	3.7e-7	7.9e-6
ENSG00000142233.11	NTN5	6.164	0.165	9.164	3.125	1.138	5.084	3.7e-7	7.9e-6
ENSG00000172733.11	PURG	3.96	0.05	5.915	2.719	1.032	5.08	3.8e-7	8.1e-6
ENSG00000138600.9	SPPL2A	26.995	31.054	24.965	-0.304	0.49	-5.079	3.8e-7	8.1e-6
ENSG00000167244.19	IGF2	431.999	41.075	627.462	3.901	0.539	5.075	3.9e-7	8.3e-6
ENSG00000146701.11	MDH2	117.006	204.085	73.466	-1.462	0.57	-5.074	3.9e-7	8.3e-6
ENSG00000106070.18	GRB10	20.766	42.868	9.715	-2.033	0.719	-5.071	3.9e-7	8.4e-6
ENSG00000185565.11	LSAMP	9.347	0.554	13.743	3.246	0.81	5.071	4.0e-7	8.4e-6
ENSG00000124143.10	ARHGAP40	2.497	0	3.745	2.247	1.63	5.071	4.0e-7	8.4e-6
ENSG00000159388.5	BTG2	41.849	90.461	17.542	-2.302	0.702	-5.07	4.0e-7	8.5e-6
ENSG00000139200.13	PIANP	5.774	0.116	8.602	3.105	1.179	5.068	4.0e-7	8.6e-6
ENSG00000111247.14	RAD51AP1	8.137	1.14	11.636	2.562	0.606	5.066	4.1e-7	8.6e-6
ENSG00000138778.11	CENPE	3.709	0.072	5.528	2.607	0.999	5.066	4.1e-7	8.6e-6
ENSG00000279208.1	CR381653.2	62.434	0.759	93.271	5.744	1.148	5.057	4.3e-7	9.0e-6
ENSG00000091483.6	FH	59.532	93.65	42.473	-1.122	0.492	-5.056	4.3e-7	9.1e-6
ENSG00000064763.10	FAR2	33.012	4.188	47.424	3.222	0.494	5.056	4.3e-7	9.1e-6
ENSG00000025156.12	HSF2	21.331	32.758	15.617	-1.023	0.453	-5.054	4.3e-7	9.1e-6
ENSG00000198945.7	L3MBTL3	21.581	1.706	31.519	3.587	0.632	5.052	4.4e-7	9.2e-6
ENSG00000186354.10	C9orf47	1.253	0.063	1.849	1.422	1.062	5.051	4.4e-7	9.3e-6
ENSG00000260548.1	AL035425.2	29.643	0	44.464	5.507	1.82	5.049	4.4e-7	9.4e-6
ENSG00000135439.11	AGAP2	47.198	2.924	69.334	4.164	0.662	5.047	4.5e-7	9.5e-6
ENSG00000164619.8	BMPER	2.711	3.931	2.101	-0.669	0.574	-5.046	4.5e-7	9.5e-6
ENSG00000176273.14	SLC35G1	12.043	0.854	17.638	3.33	0.565	5.044	4.6e-7	9.6e-6
ENSG00000102302.7	FGD1	15.334	1.136	22.433	3.456	0.62	5.042	4.6e-7	9.7e-6
ENSG00000174899.10	PQLC2L	1.011	2.737	0.148	-1.703	1.022	-5.042	4.6e-7	9.7e-6
ENSG00000176171.11	BNIP3	27.984	53.049	15.452	-1.716	0.604	-5.041	4.6e-7	9.7e-6
ENSG00000143067.4	ZNF697	8.902	0.694	13.007	3.048	0.601	5.039	4.7e-7	9.8e-6
ENSG00000109881.16	CCDC34	25.623	2.987	36.941	3.25	0.535	5.037	4.7e-7	9.9e-6
ENSG00000150722.10	PPP1R1C	3.172	7.792	0.863	-2.239	1.046	-5.036	4.7e-7	9.9e-6
ENSG00000182512.4	GLRX5	54.65	79.504	42.223	-0.897	0.478	-5.034	4.8e-7	1.0e-5
ENSG00000196177.12	ACADSB	9.449	16.431	5.958	-1.325	0.553	-5.034	4.8e-7	1.0e-5
ENSG00000183134.4	PTGDR2	1.701	4.426	0.339	-2.019	0.964	-5.031	4.9e-7	1.0e-5
ENSG00000157823.16	AP3S2	15.679	18.245	14.396	-0.322	0.481	-5.03	4.9e-7	1.0e-5
ENSG00000180834.7	MAP6D1	5.274	10.399	2.712	-1.619	0.741	-5.03	4.9e-7	1.0e-5
ENSG00000108381.10	ASPA	2.652	4.569	1.693	-1.048	0.495	-5.024	5.1e-7	1.1e-5
ENSG00000125931.10	CITED1	9.824	0.205	14.634	3.698	1.144	5.023	5.1e-7	1.1e-5
ENSG00000073584.19	SMARCE1	12.458	25.826	5.774	-1.986	0.685	-5.018	5.2e-7	1.1e-5
ENSG00000205981.7	DNAJC19	52.63	75.371	41.259	-0.854	0.538	-5.018	5.2e-7	1.1e-5
ENSG00000137101.12	CD72	7.321	0.244	10.86	3.253	0.861	5.014	5.3e-7	1.1e-5
ENSG00000110881.11	ASIC1	8.766	0.627	12.836	3.089	0.652	5.009	5.5e-7	1.1e-5
ENSG00000101003.9	GINS1	5.246	0.399	7.669	2.631	0.72	5.009	5.5e-7	1.1e-5
ENSG00000126259.19	KIRREL2	2.239	0	3.358	2.124	1.738	5.009	5.5e-7	1.1e-5
ENSG00000140939.14	NOL3	38.233	83.618	15.541	-2.355	0.716	-5.004	5.6e-7	1.2e-5
ENSG00000100479.12	POLE2	42.011	4.01	61.011	3.63	0.7	5.002	5.7e-7	1.2e-5
ENSG00000196476.11	C20orf96	37.169	1.599	54.953	4.428	0.794	5.001	5.7e-7	1.2e-5
ENSG00000079459.12	FDFT1	23.845	38.064	16.736	-1.139	0.519	-4.999	5.8e-7	1.2e-5
ENSG00000007968.6	E2F2	1.962	0.048	2.919	1.902	0.923	4.997	5.8e-7	1.2e-5
ENSG00000118257.16	NRP2	26.7	2.509	38.795	3.503	0.705	4.996	5.8e-7	1.2e-5
ENSG00000183508.4	FAM46C	3.248	7.732	1.005	-2.123	0.822	-4.996	5.8e-7	1.2e-5
ENSG00000126785.12	RHOJ	89.614	6.824	131.009	4.077	0.633	4.996	5.9e-7	1.2e-5
ENSG00000110955.8	ATP5F1B	514.536	812.109	365.75	-1.149	0.57	-4.991	6.0e-7	1.2e-5
ENSG00000169715.14	MT1E	27.008	70.655	5.184	-3.534	1.031	-4.991	6.0e-7	1.2e-5
ENSG00000111058.7	ACSS3	1.832	3.899	0.799	-1.445	0.775	-4.991	6.0e-7	1.2e-5
ENSG00000112964.13	GHR	7.961	15.558	4.163	-1.681	0.77	-4.991	6.0e-7	1.2e-5
ENSG00000180992.6	MRPL14	69.033	124.071	41.515	-1.557	0.553	-4.991	6.0e-7	1.2e-5
ENSG00000099364.16	FBXL19	32.709	1.804	48.161	4.132	0.693	4.989	6.1e-7	1.2e-5
ENSG00000267855.5	NDUFA7	138.686	267.923	74.067	-1.841	0.617	-4.989	6.1e-7	1.2e-5
ENSG00000165678.20	GHITM	89.153	172.81	47.325	-1.847	0.609	-4.988	6.1e-7	1.2e-5
ENSG00000169885.9	CALML6	111.122	297.738	17.815	-3.989	0.941	-4.988	6.1e-7	1.2e-5
ENSG00000126803.9	HSPA2	33.576	72.618	14.055	-2.29	0.707	-4.984	6.2e-7	1.3e-5
ENSG00000073910.21	FRY	11.031	21.833	5.63	-1.784	0.586	-4.983	6.3e-7	1.3e-5
ENSG00000100346.17	CACNA1I	1.286	0.007	1.925	1.539	1.448	4.983	6.3e-7	1.3e-5
ENSG00000105173.13	CCNE1	8.614	0.574	12.634	3.115	0.658	4.982	6.3e-7	1.3e-5
ENSG00000164100.8	NDST3	2.814	0.006	4.218	2.375	1.613	4.981	6.3e-7	1.3e-5
ENSG00000089225.19	TBX5	3.167	0.137	4.682	2.321	0.742	4.981	6.3e-7	1.3e-5
ENSG00000197375.12	SLC22A5	10.724	19.801	6.185	-1.534	0.595	-4.978	6.4e-7	1.3e-5
ENSG00000102383.13	ZDHHC15	7.792	1.486	10.945	2.265	0.604	4.977	6.4e-7	1.3e-5
ENSG00000100985.7	MMP9	9.123	0.01	13.679	3.861	1.814	4.975	6.5e-7	1.3e-5
ENSG00000171864.4	PRND	1.774	0.015	2.653	1.847	1.291	4.974	6.6e-7	1.3e-5
ENSG00000145014.17	TMEM44	66.543	3.497	98.067	4.461	0.747	4.971	6.6e-7	1.3e-5
ENSG00000188542.9	DUSP28	9.904	20.297	4.707	-1.9	0.593	-4.971	6.7e-7	1.4e-5
ENSG00000130821.15	SLC6A8	25.839	40.813	18.352	-1.111	0.542	-4.97	6.7e-7	1.4e-5
ENSG00000109738.10	GLRB	1.412	2.582	0.827	-0.972	0.633	-4.969	6.7e-7	1.4e-5
ENSG00000144554.10	FANCD2	21.905	0.894	32.411	4.14	0.792	4.968	6.8e-7	1.4e-5
ENSG00000136859.9	ANGPTL2	18.064	32.143	11.025	-1.463	0.625	-4.967	6.8e-7	1.4e-5
ENSG00000282988.1	AL031777.3	6.097	0	9.145	3.343	1.772	4.965	6.9e-7	1.4e-5
ENSG00000169607.12	CKAP2L	2.511	0.156	3.689	2.02	0.87	4.965	6.9e-7	1.4e-5
ENSG00000146197.8	SCUBE3	2.605	0.198	3.808	2.005	0.631	4.961	7.0e-7	1.4e-5
ENSG00000165629.19	ATP5F1C	286.835	361.559	249.473	-0.534	0.543	-4.96	7.1e-7	1.4e-5
ENSG00000179564.3	LSMEM2	2.476	6.926	0.252	-2.663	1.229	-4.959	7.1e-7	1.4e-5
ENSG00000131771.13	PPP1R1B	0.712	2.001	0.068	-1.49	1.194	-4.957	7.2e-7	1.4e-5
ENSG00000162804.13	SNED1	4.003	8.707	1.651	-1.872	0.623	-4.957	7.2e-7	1.4e-5
ENSG00000114631.10	PODXL2	30.514	1.223	45.16	4.376	0.812	4.956	7.2e-7	1.4e-5
ENSG00000162645.12	GBP2	10.689	24.289	3.89	-2.371	0.752	-4.954	7.3e-7	1.5e-5
ENSG00000214194.8	SMIM30	59.904	108.565	35.573	-1.583	0.567	-4.953	7.3e-7	1.5e-5
ENSG00000186051.6	TAL2	4.186	10.037	1.261	-2.287	0.86	-4.95	7.4e-7	1.5e-5
ENSG00000135931.17	ARMC9	27.631	0.994	40.949	4.395	0.823	4.95	7.4e-7	1.5e-5
ENSG00000188580.14	NKAIN2	0.631	1.364	0.265	-0.902	0.944	-4.949	7.5e-7	1.5e-5
ENSG00000178055.11	PRSS42	6.054	15.514	1.324	-2.829	0.925	-4.948	7.5e-7	1.5e-5
ENSG00000138161.13	CUZD1	2.968	0.134	4.385	2.247	0.801	4.948	7.5e-7	1.5e-5
ENSG00000101187.15	SLCO4A1	1.986	5.021	0.469	-2.035	0.927	-4.945	7.6e-7	1.5e-5
ENSG00000120669.15	SOHLH2	30.056	0.475	44.846	4.958	1.117	4.944	7.7e-7	1.5e-5
ENSG00000157502.13	MUM1L1	2.998	5.947	1.524	-1.461	0.631	-4.942	7.7e-7	1.5e-5
ENSG00000084733.10	RAB10	57.269	100.298	35.755	-1.463	0.56	-4.942	7.8e-7	1.5e-5
ENSG00000187479.6	C11orf96	89.399	7.537	130.329	3.943	0.604	4.941	7.8e-7	1.6e-5
ENSG00000123836.14	PFKFB2	15.698	29.505	8.795	-1.639	0.558	-4.94	7.8e-7	1.6e-5
ENSG00000274026.1	FAM27E3	32.914	0.405	49.169	5.158	1.272	4.94	7.8e-7	1.6e-5
ENSG00000111907.20	TPD52L1	48.192	105.868	19.353	-2.393	0.697	-4.939	7.9e-7	1.6e-5
ENSG00000163170.11	BOLA3	38.314	74.817	20.062	-1.848	0.616	-4.938	7.9e-7	1.6e-5
ENSG00000163412.12	EIF4E3	8.471	18.971	3.22	-2.242	0.747	-4.936	8.0e-7	1.6e-5
ENSG00000105722.9	ERF	85.293	6.773	124.554	4.014	0.548	4.933	8.1e-7	1.6e-5
ENSG00000132122.11	SPATA6	16.81	1.651	24.389	3.26	0.473	4.93	8.2e-7	1.6e-5
ENSG00000188372.14	ZP3	19.338	0.102	28.956	4.765	1.13	4.93	8.2e-7	1.6e-5
ENSG00000172932.14	ANKRD13D	80.878	5.08	118.777	4.3	0.669	4.929	8.3e-7	1.6e-5
ENSG00000204442.3	FAM155A	0.627	0.034	0.924	0.895	0.731	4.928	8.3e-7	1.6e-5
ENSG00000182257.6	PRR34	1.144	2.699	0.366	-1.437	0.819	-4.927	8.4e-7	1.7e-5
ENSG00000148339.12	SLC25A25	9.772	15.313	7.001	-1.028	0.484	-4.927	8.4e-7	1.7e-5
ENSG00000135940.6	COX5B	368.837	769.51	168.501	-2.185	0.689	-4.926	8.4e-7	1.7e-5
ENSG00000173915.14	ATP5MD	916.659	1556.45	596.76	-1.382	0.535	-4.925	8.4e-7	1.7e-5
ENSG00000277909.4	SPC25	6.299	0.045	9.426	3.319	1.256	4.924	8.5e-7	1.7e-5
ENSG00000095739.10	BAMBI	9.688	1.023	14.021	2.892	0.53	4.924	8.5e-7	1.7e-5
ENSG00000216775.3	AL109918.1	6.747	0.314	9.963	3.06	0.765	4.921	8.6e-7	1.7e-5
ENSG00000117592.8	PRDX6	206.734	325.074	147.565	-1.134	0.505	-4.919	8.7e-7	1.7e-5
ENSG00000129295.8	LRRC6	12.225	0.702	17.987	3.48	0.869	4.918	8.7e-7	1.7e-5
ENSG00000164405.10	UQCRQ	473.851	950.018	235.767	-2.006	0.638	-4.917	8.8e-7	1.7e-5
ENSG00000255583.2	AC084357.3	3.059	0	4.589	2.483	1.832	4.917	8.8e-7	1.7e-5
ENSG00000174721.9	FGFBP3	14.163	0.397	21.047	3.98	0.925	4.916	8.8e-7	1.7e-5
ENSG00000167748.10	KLK1	14.131	0.103	21.145	4.328	1.305	4.913	9.0e-7	1.8e-5
ENSG00000133026.12	MYH10	38.895	3.254	56.716	3.762	0.594	4.912	9.0e-7	1.8e-5
ENSG00000163462.17	TRIM46	2.598	0.012	3.891	2.273	1.533	4.91	9.1e-7	1.8e-5
ENSG00000228252.9	COL6A4P2	11.463	0	17.194	4.185	1.771	4.907	9.2e-7	1.8e-5
ENSG00000106554.12	CHCHD3	50.947	95.558	28.642	-1.704	0.6	-4.907	9.2e-7	1.8e-5
ENSG00000233490.7	GPSM3	16.476	1.173	24.128	3.531	0.649	4.905	9.3e-7	1.8e-5
ENSG00000274286.1	ADRA2B	1.073	2.069	0.575	-0.963	0.612	-4.901	9.5e-7	1.9e-5
ENSG00000164362.18	TERT	5.665	0	8.497	3.247	1.906	4.9	9.6e-7	1.9e-5
ENSG00000171766.15	GATM	18.003	38.493	7.759	-2.173	0.73	-4.899	9.7e-7	1.9e-5
ENSG00000142303.13	ADAMTS10	84.848	3.933	125.305	4.678	0.723	4.898	9.7e-7	1.9e-5
ENSG00000185761.10	ADAMTSL5	4.198	9.785	1.405	-2.165	0.824	-4.896	9.8e-7	1.9e-5
ENSG00000169714.16	CNBP	359.698	616.281	231.407	-1.409	0.535	-4.895	9.8e-7	1.9e-5
ENSG00000125148.6	MT2A	75.463	176.898	24.745	-2.789	0.817	-4.895	9.8e-7	1.9e-5
ENSG00000136267.13	DGKB	6.203	0.457	9.076	2.79	1.095	4.895	9.8e-7	1.9e-5
ENSG00000115112.7	TFCP2L1	0.172	0.38	0.068	-0.37	0.727	-4.893	1.0e-6	1.9e-5
ENSG00000133107.14	TRPC4	1.544	0.186	2.223	1.442	0.838	4.892	1.0e-6	1.9e-5
ENSG00000185418.15	TARSL2	12.044	19.14	8.496	-1.085	0.516	-4.892	1.0e-6	1.9e-5
ENSG00000076864.19	RAP1GAP	3.03	0.11	4.491	2.307	1.139	4.891	1.0e-6	1.9e-5
ENSG00000164919.10	COX6C	580.344	1055.55	342.741	-1.62	0.583	-4.89	1.0e-6	2.0e-5
ENSG00000132681.16	ATP1A4	1.419	3.747	0.255	-1.92	0.788	-4.889	1.0e-6	2.0e-5
ENSG00000167632.14	TRAPPC9	10.037	16.843	6.634	-1.225	0.523	-4.888	1.0e-6	2.0e-5
ENSG00000152284.4	TCF7L1	55.018	5.536	79.759	3.627	0.571	4.888	1.0e-6	2.0e-5
ENSG00000164620.8	RELL2	5.278	0.146	7.844	2.948	0.932	4.885	1.0e-6	2.0e-5
ENSG00000062582.13	MRPS24	149.413	280.867	83.687	-1.735	0.601	-4.882	1.1e-6	2.0e-5
ENSG00000083720.12	OXCT1	12.16	22.048	7.217	-1.488	0.621	-4.869	1.1e-6	2.2e-5
ENSG00000134321.11	RSAD2	15.453	40.36	3	-3.37	1.035	-4.869	1.1e-6	2.2e-5
ENSG00000165891.15	E2F7	0.997	0.03	1.481	1.269	0.929	4.865	1.1e-6	2.2e-5
ENSG00000162493.16	PDPN	7.358	17.845	2.114	-2.597	0.87	-4.865	1.1e-6	2.2e-5
ENSG00000142949.16	PTPRF	18.367	1.896	26.602	3.253	0.58	4.864	1.1e-6	2.2e-5
ENSG00000074219.13	TEAD2	122.181	7.893	179.324	4.342	0.675	4.861	1.2e-6	2.2e-5
ENSG00000106443.16	PHF14	70.489	6.138	102.665	3.86	0.498	4.861	1.2e-6	2.2e-5
ENSG00000126267.8	COX6B1	350.766	637.238	207.53	-1.614	0.591	-4.859	1.2e-6	2.3e-5
ENSG00000102409.9	BEX4	58.847	6.565	84.988	3.507	0.521	4.857	1.2e-6	2.3e-5
ENSG00000182463.15	TSHZ2	18.109	1.057	26.635	3.748	0.647	4.856	1.2e-6	2.3e-5
ENSG00000162378.12	ZYG11B	14.636	25.244	9.333	-1.345	0.543	-4.855	1.2e-6	2.3e-5
ENSG00000183576.12	SETD3	30.327	51.742	19.619	-1.355	0.535	-4.855	1.2e-6	2.3e-5
ENSG00000171604.11	CXXC5	22.374	40.625	13.248	-1.547	0.729	-4.853	1.2e-6	2.3e-5
ENSG00000101844.17	ATG4A	8.871	12.645	6.985	-0.773	0.484	-4.852	1.2e-6	2.3e-5
ENSG00000204681.10	GABBR1	37.497	2.473	55.008	4.011	0.721	4.851	1.2e-6	2.3e-5
ENSG00000156345.17	CDK20	7.791	0.782	11.295	2.787	0.579	4.851	1.2e-6	2.3e-5
ENSG00000213996.12	TM6SF2	5.177	0	7.765	3.132	1.714	4.85	1.2e-6	2.4e-5
ENSG00000184108.7	TRIML1	2.228	0	3.343	2.119	1.614	4.848	1.2e-6	2.4e-5
ENSG00000171940.13	ZNF217	15.199	1.382	22.107	3.278	0.57	4.847	1.3e-6	2.4e-5
ENSG00000225932.3	CTAGE4	3.124	0.055	4.659	2.423	1.125	4.843	1.3e-6	2.4e-5
ENSG00000065600.12	TMEM206	17.989	1.078	26.445	3.723	0.682	4.84	1.3e-6	2.5e-5
ENSG00000143469.18	SYT14	3.15	0.168	4.642	2.271	0.646	4.835	1.3e-6	2.5e-5
ENSG00000069431.11	ABCC9	10.74	19.636	6.291	-1.501	0.52	-4.833	1.3e-6	2.6e-5
ENSG00000248383.4	PCDHAC1	1.553	0.018	2.321	1.705	1.209	4.832	1.4e-6	2.6e-5
ENSG00000241749.4	RPSAP52	4.035	0	6.053	2.818	1.635	4.832	1.4e-6	2.6e-5
ENSG00000116981.3	NT5C1A	1.359	3.6	0.238	-1.894	1.044	-4.832	1.4e-6	2.6e-5
ENSG00000243364.7	EFNA4	13.582	1.011	19.868	3.375	0.655	4.83	1.4e-6	2.6e-5
ENSG00000168234.12	TTC39C	12.213	1.307	17.666	3.016	0.671	4.829	1.4e-6	2.6e-5
ENSG00000105808.17	RASA4	77.739	151.094	41.061	-1.854	0.681	-4.827	1.4e-6	2.6e-5
ENSG00000081842.17	PCDHA6	1.645	0.01	2.463	1.779	1.395	4.826	1.4e-6	2.6e-5
ENSG00000117408.10	IPO13	49.825	54.904	47.285	-0.211	0.465	-4.825	1.4e-6	2.6e-5
ENSG00000163219.11	ARHGAP25	17.35	1.932	25.059	3.152	0.54	4.823	1.4e-6	2.7e-5
ENSG00000242615.1	AC022415.1	12.142	0.622	17.902	3.543	0.82	4.822	1.4e-6	2.7e-5
ENSG00000081277.12	PKP1	0.63	1.62	0.135	-1.207	1.018	-4.822	1.4e-6	2.7e-5
ENSG00000136457.9	CHAD	2.558	5.503	1.085	-1.641	0.717	-4.819	1.4e-6	2.7e-5
ENSG00000130816.15	DNMT1	61.933	10.724	87.538	2.917	0.5	4.816	1.5e-6	2.8e-5
ENSG00000250317.8	SMIM20	35.255	58.836	23.465	-1.29	0.582	-4.816	1.5e-6	2.8e-5
ENSG00000181035.13	SLC25A42	14.51	17.349	13.09	-0.381	0.475	-4.814	1.5e-6	2.8e-5
ENSG00000118777.11	ABCG2	4.208	0.245	6.189	2.529	0.732	4.813	1.5e-6	2.8e-5
ENSG00000158104.11	HPD	0.89	2.179	0.245	-1.352	0.93	-4.811	1.5e-6	2.8e-5
ENSG00000198369.9	SPRED2	60.795	6.166	88.11	3.636	0.512	4.81	1.5e-6	2.8e-5
ENSG00000136813.14	ECPAS	31.36	47.708	23.186	-1.01	0.469	-4.809	1.5e-6	2.8e-5
ENSG00000167186.10	COQ7	18.232	29.078	12.808	-1.123	0.451	-4.809	1.5e-6	2.8e-5
ENSG00000079999.13	KEAP1	49.139	67.71	39.854	-0.75	0.472	-4.808	1.5e-6	2.8e-5
ENSG00000129993.14	CBFA2T3	3.081	5.892	1.675	-1.365	0.625	-4.808	1.5e-6	2.8e-5
ENSG00000197183.14	NOL4L	10.826	0.69	15.894	3.322	0.621	4.805	1.5e-6	2.9e-5
ENSG00000184076.13	UQCR10	161.294	348.018	67.933	-2.34	0.764	-4.805	1.5e-6	2.9e-5
ENSG00000181264.8	TMEM136	7.113	0.742	10.298	2.697	0.514	4.804	1.6e-6	2.9e-5
ENSG00000092068.19	SLC7A8	6.184	12.02	3.266	-1.61	0.578	-4.798	1.6e-6	3.0e-5
ENSG00000189212.12	DPY19L2P1	9.22	0.371	13.644	3.417	0.821	4.797	1.6e-6	3.0e-5
ENSG00000172244.8	C5orf34	6.849	0.301	10.123	3.096	0.665	4.796	1.6e-6	3.0e-5
ENSG00000173715.16	C11orf80	26.006	1.319	38.349	4.085	0.825	4.795	1.6e-6	3.0e-5
ENSG00000153406.13	NMRAL1	51.561	4.395	75.144	3.819	0.611	4.794	1.6e-6	3.0e-5
ENSG00000203780.10	FANK1	22.063	0.178	33.006	4.852	1.22	4.793	1.6e-6	3.1e-5
ENSG00000071539.13	TRIP13	5.943	0.246	8.791	2.974	0.834	4.793	1.6e-6	3.1e-5
ENSG00000137313.15	TRIM26	1.826	4.4e-4	2.74	1.902	1.8	4.793	1.6e-6	3.1e-5
ENSG00000165985.9	C1QL3	0.317	0.858	0.047	-0.828	1.394	-4.788	1.7e-6	3.1e-5
ENSG00000178053.17	MLF1	27.889	49.99	16.839	-1.515	0.578	-4.785	1.7e-6	3.2e-5
ENSG00000104267.9	CA2	10.985	27.725	2.615	-2.99	0.998	-4.783	1.7e-6	3.2e-5
ENSG00000214946.14	TBC1D26	5.231	0.04	7.827	3.085	1.242	4.783	1.7e-6	3.2e-5
ENSG00000134247.9	PTGFRN	121.213	7.042	178.298	4.479	0.587	4.782	1.7e-6	3.2e-5
ENSG00000164949.7	GEM	29.868	2.233	43.686	3.789	0.601	4.781	1.7e-6	3.2e-5
ENSG00000070669.16	ASNS	32.282	3.45	46.699	3.422	0.587	4.778	1.8e-6	3.3e-5
ENSG00000134874.17	DZIP1	36.465	2.065	53.665	4.157	0.601	4.778	1.8e-6	3.3e-5
ENSG00000132823.10	OSER1	37.506	56.675	27.922	-0.996	0.457	-4.777	1.8e-6	3.3e-5
ENSG00000155367.15	PPM1J	16.469	34.897	7.255	-2.12	0.702	-4.774	1.8e-6	3.3e-5
ENSG00000258947.6	TUBB3	8.388	0.37	12.397	3.29	1.067	4.773	1.8e-6	3.3e-5
ENSG00000214617.9	SLC6A10P	15.501	0.192	23.155	4.341	1.263	4.772	1.8e-6	3.3e-5
ENSG00000070371.15	CLTCL1	20.21	35.064	12.783	-1.388	0.707	-4.772	1.8e-6	3.4e-5
ENSG00000165644.10	COMTD1	10.279	18.866	5.985	-1.508	0.667	-4.771	1.8e-6	3.4e-5
ENSG00000172167.7	MTBP	7.17	0.544	10.484	2.895	0.638	4.771	1.8e-6	3.4e-5
ENSG00000105696.8	TMEM59L	36.551	1.441	54.106	4.497	0.83	4.765	1.9e-6	3.5e-5
ENSG00000276045.3	ORAI1	18.068	35.606	9.298	-1.83	0.62	-4.765	1.9e-6	3.5e-5
ENSG00000183770.5	FOXL2	1.175	0	1.762	1.466	1.636	4.765	1.9e-6	3.5e-5
ENSG00000060762.18	MPC1	75.534	169.996	28.303	-2.545	0.799	-4.763	1.9e-6	3.5e-5
ENSG00000244306.10	AL589743.1	19.73	1.745	28.722	3.437	0.631	4.762	1.9e-6	3.5e-5
ENSG00000198720.12	ANKRD13B	72.793	3.127	107.626	4.718	0.777	4.76	1.9e-6	3.5e-5
ENSG00000230196.1	DDX43P3	17.532	0	26.298	4.771	1.614	4.756	2.0e-6	3.6e-5
ENSG00000188916.8	FAM196A	1.739	0.03	2.593	1.803	1.065	4.755	2.0e-6	3.6e-5
ENSG00000129988.5	LBP	0.989	2.5	0.234	-1.505	0.966	-4.754	2.0e-6	3.6e-5
ENSG00000172901.19	LVRN	1.431	2.815	0.739	-1.134	0.74	-4.753	2.0e-6	3.6e-5
ENSG00000168758.10	SEMA4C	35.29	4.689	50.59	3.181	0.448	4.753	2.0e-6	3.7e-5
ENSG00000118298.10	CA14	4.514	7.83	2.855	-1.195	0.656	-4.751	2.0e-6	3.7e-5
ENSG00000165238.16	WNK2	10.063	18.723	5.734	-1.55	0.711	-4.751	2.0e-6	3.7e-5
ENSG00000101134.11	DOK5	8.607	16.212	4.805	-1.568	0.621	-4.751	2.0e-6	3.7e-5
ENSG00000155530.3	LRGUK	1.727	0.035	2.574	1.788	1.037	4.749	2.0e-6	3.7e-5
ENSG00000167969.12	ECI1	73.709	132.331	44.398	-1.554	0.567	-4.748	2.1e-6	3.7e-5
ENSG00000275004.3	ZNF280B	0.907	0.048	1.336	1.156	0.831	4.748	2.1e-6	3.7e-5
ENSG00000067225.17	PKM	345.221	660.66	187.501	-1.812	0.616	-4.744	2.1e-6	3.8e-5
ENSG00000125356.6	NDUFA1	170.001	332.886	88.559	-1.898	0.652	-4.74	2.1e-6	3.9e-5
ENSG00000165526.8	RPUSD4	37.759	51.257	31.01	-0.707	0.481	-4.74	2.1e-6	3.9e-5
ENSG00000257591.5	ZNF625	6.257	0.298	9.236	2.979	0.819	4.74	2.1e-6	3.9e-5
ENSG00000121005.8	CRISPLD1	18.822	0.678	27.894	4.106	0.843	4.739	2.1e-6	3.9e-5
ENSG00000177839.6	PCDHB9	4.561	0.547	6.569	2.29	0.917	4.739	2.1e-6	3.9e-5
ENSG00000123612.15	ACVR1C	0.148	0.339	0.053	-0.347	0.819	-4.738	2.2e-6	3.9e-5
ENSG00000143158.10	MPC2	60.857	109.283	36.644	-1.551	0.644	-4.738	2.2e-6	3.9e-5
ENSG00000163958.13	ZDHHC19	22.679	0	34.018	5.13	1.897	4.737	2.2e-6	3.9e-5
ENSG00000129946.10	SHC2	80.353	4.571	118.244	4.42	0.741	4.737	2.2e-6	3.9e-5
ENSG00000129654.7	FOXJ1	2.804	0	4.206	2.38	1.869	4.735	2.2e-6	3.9e-5
ENSG00000146276.11	GABRR1	6.12	0.013	9.173	3.329	1.712	4.735	2.2e-6	3.9e-5
ENSG00000163535.17	SGO2	4.616	0.432	6.708	2.428	0.796	4.733	2.2e-6	4.0e-5
ENSG00000178734.5	LMO7DN	4.843	0.092	7.218	2.911	1.035	4.732	2.2e-6	4.0e-5
ENSG00000176340.3	COX8A	457.981	862.456	255.743	-1.75	0.628	-4.731	2.2e-6	4.0e-5
ENSG00000183864.4	TOB2	32.869	59.817	19.395	-1.576	0.605	-4.731	2.2e-6	4.0e-5
ENSG00000198715.11	GLMP	63.571	6.374	92.17	3.659	0.546	4.731	2.2e-6	4.0e-5
ENSG00000154310.16	TNIK	5.053	13.307	0.925	-2.894	0.913	-4.73	2.2e-6	4.0e-5
ENSG00000124181.14	PLCG1	175.192	23.747	250.915	3.348	0.492	4.729	2.3e-6	4.0e-5
ENSG00000153879.8	CEBPG	11.345	17.53	8.253	-1.002	0.474	-4.729	2.3e-6	4.0e-5
ENSG00000082512.14	TRAF5	20.608	1.62	30.103	3.57	0.68	4.729	2.3e-6	4.0e-5
ENSG00000106049.8	HIBADH	33.739	57.586	21.815	-1.361	0.554	-4.725	2.3e-6	4.1e-5
ENSG00000170891.10	CYTL1	16.997	0.17	25.411	4.496	1.195	4.725	2.3e-6	4.1e-5
ENSG00000107262.20	BAG1	78.423	142.355	46.457	-1.595	0.57	-4.725	2.3e-6	4.1e-5
ENSG00000224081.8	SLC44A3-AS1	16.807	0.658	24.881	3.965	0.7	4.724	2.3e-6	4.1e-5
ENSG00000034510.5	TMSB10	5808.75	637.891	8394.18	3.716	0.53	4.722	2.3e-6	4.2e-5
ENSG00000067840.12	PDZD4	69.078	5.184	101.025	4.044	0.696	4.721	2.3e-6	4.2e-5
ENSG00000271723.5	MROH7-TTC4	0.75	1.975	0.137	-1.388	1.021	-4.72	2.4e-6	4.2e-5
ENSG00000272196.2	HIST2H2AA4	192.689	5.666	286.201	5.429	0.949	4.719	2.4e-6	4.2e-5
ENSG00000226174.6	TEX22	4.31	0.252	6.339	2.551	1.183	4.717	2.4e-6	4.2e-5
ENSG00000198155.5	ZNF876P	2.444	0.078	3.626	2.101	0.912	4.717	2.4e-6	4.2e-5
ENSG00000164398.12	ACSL6	2.5	6.254	0.623	-2.16	0.767	-4.717	2.4e-6	4.3e-5
ENSG00000196131.6	VN1R2	1.026	1.927	0.575	-0.894	1.081	-4.712	2.4e-6	4.3e-5
ENSG00000119421.6	NDUFA8	109.31	183.354	72.288	-1.331	0.536	-4.711	2.5e-6	4.4e-5
ENSG00000187944.2	C2orf66	3.07	0	4.605	2.487	1.748	4.711	2.5e-6	4.4e-5
ENSG00000152527.13	PLEKHH2	13.897	0.772	20.459	3.598	0.78	4.708	2.5e-6	4.4e-5
ENSG00000105976.14	MET	2.499	5.873	0.812	-1.924	0.876	-4.707	2.5e-6	4.5e-5
ENSG00000165105.9	RASEF	4.823	0.45	7.009	2.465	0.753	4.705	2.5e-6	4.5e-5
ENSG00000105255.10	FSD1	8.77	0.1	13.105	3.681	1.267	4.703	2.6e-6	4.5e-5
ENSG00000277603.4	TPO	0.936	1.867	0.471	-0.963	0.914	-4.702	2.6e-6	4.6e-5
ENSG00000179456.10	ZBTB18	9.831	23.966	2.764	-2.73	0.91	-4.701	2.6e-6	4.6e-5
ENSG00000272419.6	AC241585.2	82.569	203.738	21.985	-3.155	0.569	-4.7	2.6e-6	4.6e-5
ENSG00000182551.13	ADI1	38.432	64.928	25.184	-1.332	0.523	-4.699	2.6e-6	4.6e-5
ENSG00000129810.14	SGO1	3.355	0.141	4.963	2.386	1.043	4.698	2.6e-6	4.6e-5
ENSG00000165533.18	TTC8	17.356	2.502	24.783	2.88	0.511	4.698	2.6e-6	4.6e-5
ENSG00000256618.2	MTRNR2L1	53.385	88.855	35.65	-1.294	0.531	-4.697	2.6e-6	4.7e-5
ENSG00000231551.8	AC245100.4	10.005	0.421	14.797	3.475	0.881	4.696	2.7e-6	4.7e-5
ENSG00000119326.14	CTNNAL1	12.296	18.038	9.426	-0.869	0.552	-4.695	2.7e-6	4.7e-5
ENSG00000146066.2	HIGD2A	178.525	306.436	114.57	-1.412	0.558	-4.693	2.7e-6	4.7e-5
ENSG00000164292.12	RHOBTB3	10.174	16.257	7.133	-1.085	0.468	-4.692	2.7e-6	4.7e-5
ENSG00000164114.18	MAP9	5.235	0.368	7.669	2.664	0.667	4.692	2.7e-6	4.7e-5
ENSG00000067064.11	IDI1	39.637	71.369	23.771	-1.547	0.642	-4.692	2.7e-6	4.8e-5
ENSG00000166845.13	C18orf54	4.357	0.303	6.384	2.503	0.562	4.688	2.8e-6	4.8e-5
ENSG00000008517.16	IL32	122.691	260.049	54.012	-2.247	0.755	-4.686	2.8e-6	4.9e-5
ENSG00000170017.12	ALCAM	19.806	1.174	29.122	3.792	0.715	4.685	2.8e-6	4.9e-5
ENSG00000140479.16	PCSK6	6.775	10.284	5.021	-0.906	0.708	-4.685	2.8e-6	4.9e-5
ENSG00000162139.9	NEU3	8.657	12.103	6.935	-0.724	0.509	-4.683	2.8e-6	4.9e-5
ENSG00000174938.14	SEZ6L2	3.19	0.14	4.715	2.326	0.872	4.683	2.8e-6	4.9e-5
ENSG00000150636.17	CCDC102B	38.023	2.273	55.898	4.12	0.622	4.683	2.8e-6	4.9e-5
ENSG00000133112.16	TPT1	7414.23	14489.5	3876.59	-1.902	0.67	-4.68	2.9e-6	5.0e-5
ENSG00000213123.10	TCTEX1D2	41.336	1.022	61.492	4.95	0.825	4.68	2.9e-6	5.0e-5
ENSG00000079112.9	CDH17	8.228	0.902	11.89	2.761	1.181	4.679	2.9e-6	5.0e-5
ENSG00000159212.12	CLIC6	0.448	1.14	0.102	-0.957	1.006	-4.679	2.9e-6	5.0e-5
ENSG00000160781.15	PAQR6	15.771	0.512	23.401	4.013	0.929	4.678	2.9e-6	5.0e-5
ENSG00000111057.10	KRT18	23.566	0.363	35.168	4.73	1.161	4.678	2.9e-6	5.0e-5
ENSG00000186197.14	EDARADD	7.284	0.1	10.877	3.433	1.234	4.676	2.9e-6	5.1e-5
ENSG00000113070.7	HBEGF	4.174	6.959	2.782	-1.074	0.537	-4.676	2.9e-6	5.1e-5
ENSG00000160957.12	RECQL4	40.433	2.219	59.541	4.233	0.791	4.676	2.9e-6	5.1e-5
ENSG00000099624.7	ATP5F1D	305.087	510.265	202.498	-1.329	0.603	-4.675	2.9e-6	5.1e-5
ENSG00000256053.7	APOPT1	65.388	109.08	43.543	-1.305	0.513	-4.673	3.0e-6	5.1e-5
ENSG00000278134.1	AL627230.7	53.239	0.282	79.718	5.976	1.513	4.672	3.0e-6	5.2e-5
ENSG00000033327.12	GAB2	17.529	1.877	25.355	3.195	0.523	4.671	3.0e-6	5.2e-5
ENSG00000119912.15	IDE	12.334	18.893	9.054	-0.984	0.524	-4.669	3.0e-6	5.2e-5
ENSG00000151917.17	BEND6	2.249	3.711	1.518	-0.904	0.594	-4.667	3.1e-6	5.3e-5
ENSG00000144395.17	CCDC150	15.907	0.432	23.644	4.105	1.011	4.666	3.1e-6	5.3e-5
ENSG00000215795.2	AL390728.2	8.943	0.023	13.403	3.816	1.785	4.666	3.1e-6	5.3e-5
ENSG00000004779.9	NDUFAB1	159.289	279.061	99.404	-1.48	0.571	-4.665	3.1e-6	5.3e-5
ENSG00000265763.3	ZNF488	1.858	0.044	2.765	1.85	1.05	4.665	3.1e-6	5.3e-5
ENSG00000008196.12	TFAP2B	1.371	0	2.056	1.612	1.871	4.662	3.1e-6	5.4e-5
ENSG00000196932.11	TMEM26	1.333	0.05	1.975	1.503	0.853	4.662	3.1e-6	5.4e-5
ENSG00000137831.14	UACA	108.071	157.482	83.366	-0.91	0.547	-4.661	3.2e-6	5.4e-5
ENSG00000170469.10	SPATA24	9.04	16.389	5.366	-1.45	0.603	-4.66	3.2e-6	5.4e-5
ENSG00000175505.10	CLCF1	10.795	0.373	16.006	3.63	0.904	4.659	3.2e-6	5.5e-5
ENSG00000162931.11	TRIM17	3.487	0.181	5.14	2.378	0.907	4.658	3.2e-6	5.5e-5
ENSG00000123610.4	TNFAIP6	1.415	2.641	0.802	-1.015	0.708	-4.656	3.2e-6	5.5e-5
ENSG00000171320.14	ESCO2	2.213	0.06	3.29	2.018	0.91	4.656	3.2e-6	5.5e-5
ENSG00000061455.10	PRDM6	2.527	0.152	3.715	2.033	0.742	4.655	3.2e-6	5.6e-5
ENSG00000130035.6	GALNT8	8.64	0.502	12.709	3.19	0.735	4.655	3.2e-6	5.6e-5
ENSG00000164087.7	POC1A	4.779	0.359	6.989	2.556	0.669	4.654	3.3e-6	5.6e-5
ENSG00000135749.18	PCNX2	14.285	3.395	19.73	2.238	0.608	4.652	3.3e-6	5.6e-5
ENSG00000105379.9	ETFB	101.724	173.203	65.984	-1.379	0.5	-4.65	3.3e-6	5.7e-5
ENSG00000167281.18	RBFOX3	12.663	2.439	17.776	2.449	1.117	4.65	3.3e-6	5.7e-5
ENSG00000173950.15	XXYLT1	14.706	1.613	21.253	3.09	0.554	4.649	3.3e-6	5.7e-5
ENSG00000013573.16	DDX11	71.498	5.335	104.579	4.059	0.799	4.648	3.3e-6	5.7e-5
ENSG00000165637.13	VDAC2	125.855	210.915	83.326	-1.329	0.571	-4.648	3.4e-6	5.7e-5
ENSG00000123178.14	SPRYD7	11.368	13.569	10.268	-0.371	0.522	-4.647	3.4e-6	5.7e-5
ENSG00000173253.15	DMRT2	1.927	4.653	0.564	-1.854	0.86	-4.646	3.4e-6	5.8e-5
ENSG00000111275.12	ALDH2	53.452	108.24	26.058	-2.013	0.609	-4.646	3.4e-6	5.8e-5
ENSG00000205593.11	DENND6B	13.368	0.666	19.719	3.636	0.767	4.646	3.4e-6	5.8e-5
ENSG00000108106.13	UBE2S	34.414	1.921	50.66	4.144	0.644	4.644	3.4e-6	5.8e-5
ENSG00000265916.1	AC015818.6	13.038	0.261	19.426	4.018	1.066	4.643	3.4e-6	5.8e-5
ENSG00000111199.10	TRPV4	1.649	0.052	2.448	1.712	0.993	4.642	3.5e-6	5.9e-5
ENSG00000147509.13	RGS20	9.541	0	14.312	3.937	1.967	4.64	3.5e-6	5.9e-5
ENSG00000198721.12	ECI2	65.267	101.352	47.224	-1.086	0.45	-4.64	3.5e-6	5.9e-5
ENSG00000204839.8	MROH6	17.756	1.175	26.047	3.637	0.766	4.638	3.5e-6	6.0e-5
ENSG00000169764.15	UGP2	133.017	296.188	51.432	-2.503	0.779	-4.638	3.5e-6	6.0e-5
ENSG00000152234.15	ATP5F1A	350.82	555.55	248.455	-1.158	0.507	-4.636	3.6e-6	6.0e-5
ENSG00000153303.17	FRMD1	0.294	0.687	0.097	-0.621	0.785	-4.636	3.6e-6	6.0e-5
ENSG00000182606.14	TRAK1	32.521	61.909	17.827	-1.74	0.498	-4.635	3.6e-6	6.0e-5
ENSG00000284128.1	AP000356.3	19.777	0.126	29.603	4.764	1.3	4.634	3.6e-6	6.0e-5
ENSG00000227460.8	SYNGAP1	18.643	0.737	27.596	4.041	0.982	4.632	3.6e-6	6.1e-5
ENSG00000072062.13	PRKACA	47.165	80.144	30.676	-1.357	0.563	-4.631	3.6e-6	6.1e-5
ENSG00000175305.17	CCNE2	5.865	0.677	8.459	2.496	0.618	4.63	3.7e-6	6.2e-5
ENSG00000135052.16	GOLM1	41.493	4.994	59.742	3.341	0.512	4.629	3.7e-6	6.2e-5
ENSG00000163600.12	ICOS	2.333	0.013	3.493	2.148	1.547	4.629	3.7e-6	6.2e-5
ENSG00000171202.6	TMEM126A	52.614	81.004	38.419	-1.057	0.51	-4.628	3.7e-6	6.2e-5
ENSG00000197969.12	VPS13A	13.51	18.163	11.183	-0.653	0.59	-4.628	3.7e-6	6.2e-5
ENSG00000133805.15	AMPD3	10.087	15.073	7.594	-0.903	0.626	-4.628	3.7e-6	6.2e-5
ENSG00000131495.8	NDUFA2	133.394	230.985	84.598	-1.438	0.59	-4.627	3.7e-6	6.2e-5
ENSG00000109576.13	AADAT	34.344	3.348	49.842	3.548	0.659	4.626	3.7e-6	6.3e-5
ENSG00000120688.8	WBP4	15.828	23.571	11.957	-0.923	0.466	-4.626	3.7e-6	6.3e-5
ENSG00000144837.8	PLA1A	2.352	6.376	0.34	-2.461	1.202	-4.625	3.7e-6	6.3e-5
ENSG00000121691.4	CAT	46.686	79.278	30.39	-1.355	0.61	-4.625	3.8e-6	6.3e-5
ENSG00000115163.14	CENPA	6.548	0.066	9.79	3.339	1.341	4.622	3.8e-6	6.4e-5
ENSG00000213983.11	AP1G2	84.98	7.471	123.735	3.88	0.709	4.62	3.8e-6	6.4e-5
ENSG00000205129.8	C4orf47	7.474	0.222	11.099	3.307	0.927	4.62	3.8e-6	6.4e-5
ENSG00000151914.19	DST	44.977	73.352	30.789	-1.226	0.669	-4.619	3.9e-6	6.5e-5
ENSG00000160299.16	PCNT	39.099	74.377	21.46	-1.747	0.573	-4.618	3.9e-6	6.5e-5
ENSG00000277276.3	OTUB2	0.669	0	1.004	1.003	1.671	4.615	3.9e-6	6.6e-5
ENSG00000228366.1	AL592437.1	2.667	7.492	0.255	-2.758	1.29	-4.614	4.0e-6	6.6e-5
ENSG00000106689.10	LHX2	4.185	0.032	6.261	2.815	1.564	4.611	4.0e-6	6.7e-5
ENSG00000165264.10	NDUFB6	41.26	72.982	25.399	-1.487	0.589	-4.609	4.1e-6	6.8e-5
ENSG00000229689.3	AC009237.3	5.624	0.431	8.221	2.687	0.649	4.608	4.1e-6	6.8e-5
ENSG00000124092.12	CTCFL	6.741	0.306	9.959	3.069	1.015	4.607	4.1e-6	6.8e-5
ENSG00000080546.13	SESN1	59.933	114.38	32.709	-1.775	0.723	-4.607	4.1e-6	6.8e-5
ENSG00000163815.5	CLEC3B	51.869	126.613	14.497	-3.042	0.972	-4.606	4.1e-6	6.8e-5
ENSG00000080031.9	PTPRH	2.688	0.091	3.987	2.193	1.113	4.605	4.1e-6	6.9e-5
ENSG00000215784.5	FAM72D	1.417	0	2.126	1.644	1.679	4.605	4.1e-6	6.9e-5
ENSG00000123329.17	ARHGAP9	18.192	1.918	26.329	3.228	0.537	4.603	4.2e-6	6.9e-5
ENSG00000105088.8	OLFM2	27.133	1	40.2	4.365	0.907	4.602	4.2e-6	6.9e-5
ENSG00000006042.11	TMEM98	48.114	6.183	69.08	3.286	0.522	4.602	4.2e-6	6.9e-5
ENSG00000198074.9	AKR1B10	1.011	2.596	0.218	-1.562	1.075	-4.601	4.2e-6	6.9e-5
ENSG00000185222.9	TCEAL9	97.72	12.3	140.43	3.411	0.505	4.601	4.2e-6	7.0e-5
ENSG00000150768.15	DLAT	19.052	33.224	11.967	-1.4	0.569	-4.601	4.2e-6	7.0e-5
ENSG00000278763.1	FAM27B	117.494	0	176.242	7.47	1.742	4.599	4.2e-6	7.0e-5
ENSG00000005108.15	THSD7A	6.065	0.266	8.965	2.976	0.861	4.599	4.2e-6	7.0e-5
ENSG00000158815.10	FGF17	2.313	0	3.47	2.16	1.742	4.599	4.2e-6	7.0e-5
ENSG00000101812.12	H2BFM	10.943	0.02	16.404	4.093	1.678	4.599	4.3e-6	7.0e-5
ENSG00000096093.15	EFHC1	108.265	6.174	159.31	4.482	0.647	4.596	4.3e-6	7.1e-5
ENSG00000180818.4	HOXC10	37.548	54.325	29.16	-0.875	0.558	-4.594	4.4e-6	7.2e-5
ENSG00000224287.2	MSL3P1	3.679	0.228	5.405	2.383	0.716	4.592	4.4e-6	7.2e-5
ENSG00000152475.6	ZNF837	3.373	0.112	5.004	2.433	0.909	4.592	4.4e-6	7.2e-5
ENSG00000160991.15	ORAI2	7.25	0.723	10.514	2.741	0.499	4.591	4.4e-6	7.3e-5
ENSG00000180616.8	SSTR2	5.053	0.282	7.438	2.719	0.768	4.591	4.4e-6	7.3e-5
ENSG00000168646.12	AXIN2	3.966	6.168	2.866	-0.891	0.613	-4.59	4.4e-6	7.3e-5
ENSG00000168907.13	PLA2G4F	1.392	3.505	0.336	-1.754	0.838	-4.589	4.4e-6	7.3e-5
ENSG00000111490.12	TBC1D30	4.504	0.18	6.666	2.7	0.836	4.588	4.5e-6	7.4e-5
ENSG00000174514.12	MFSD4A	3.452	0.504	4.927	1.978	0.643	4.586	4.5e-6	7.4e-5
ENSG00000122778.9	KIAA1549	3.356	0.138	4.964	2.39	0.807	4.586	4.5e-6	7.4e-5
ENSG00000123243.14	ITIH5	8.224	17.539	3.567	-2.021	0.726	-4.585	4.5e-6	7.4e-5
ENSG00000205086.6	C2orf91	4.833	0.046	7.226	2.975	1.099	4.584	4.6e-6	7.5e-5
ENSG00000111276.10	CDKN1B	28.524	48.128	18.723	-1.317	0.574	-4.584	4.6e-6	7.5e-5
ENSG00000197410.13	DCHS2	4.154	0.245	6.109	2.514	0.725	4.583	4.6e-6	7.5e-5
ENSG00000255823.4	MTRNR2L8	136.888	209.728	100.468	-1.054	0.486	-4.582	4.6e-6	7.5e-5
ENSG00000104723.20	TUSC3	70.687	4.808	103.626	4.171	0.76	4.581	4.6e-6	7.6e-5
ENSG00000142694.6	EVA1B	89.526	8.327	130.125	3.813	0.608	4.581	4.6e-6	7.6e-5
ENSG00000074964.16	ARHGEF10L	20.045	31.655	14.239	-1.1	0.537	-4.58	4.6e-6	7.6e-5
ENSG00000230067.3	HSPD1P6	8.314	0.071	12.436	3.649	1.616	4.579	4.7e-6	7.6e-5
ENSG00000197705.9	KLHL14	2.999	0.032	4.482	2.41	1.27	4.579	4.7e-6	7.6e-5
ENSG00000091140.13	DLD	81.125	150.866	46.255	-1.684	0.57	-4.578	4.7e-6	7.7e-5
ENSG00000133818.13	RRAS2	13.944	21.643	10.095	-1.029	0.495	-4.576	4.7e-6	7.7e-5
ENSG00000143171.12	RXRG	10.763	26.003	3.143	-2.704	0.857	-4.575	4.8e-6	7.8e-5
ENSG00000108830.9	RND2	2.742	0.253	3.986	1.993	0.597	4.575	4.8e-6	7.8e-5
ENSG00000109674.3	NEIL3	1.364	0	2.046	1.607	1.67	4.572	4.8e-6	7.8e-5
ENSG00000240755.1	ERLEC1P1	16.48	0.441	24.499	4.145	1.016	4.572	4.8e-6	7.8e-5
ENSG00000166278.14	C2	0.337	0.904	0.054	-0.852	1.102	-4.572	4.8e-6	7.8e-5
ENSG00000135409.10	AMHR2	0.98	2.194	0.372	-1.219	0.909	-4.572	4.8e-6	7.8e-5
ENSG00000188681.11	TEKT4P2	26.203	1.457	38.576	4.01	0.796	4.571	4.8e-6	7.9e-5
ENSG00000129451.11	KLK10	4.322	0	6.483	2.904	1.81	4.57	4.9e-6	7.9e-5
ENSG00000173482.16	PTPRM	22.709	28.909	19.61	-0.537	0.53	-4.569	4.9e-6	7.9e-5
ENSG00000266338.6	NBPF15	38.026	3.026	55.527	3.812	0.652	4.568	4.9e-6	8.0e-5
ENSG00000214826.5	DDX12P	2.485	0.103	3.676	2.084	0.886	4.564	5.0e-6	8.1e-5
ENSG00000082146.12	STRADB	28.705	47.207	19.454	-1.237	0.581	-4.56	5.1e-6	8.3e-5
ENSG00000204262.11	COL5A2	140.048	6.038	207.054	4.886	0.87	4.557	5.2e-6	8.4e-5
ENSG00000135823.13	STX6	19.774	2.5	28.411	3.071	0.488	4.557	5.2e-6	8.4e-5
ENSG00000141837.19	CACNA1A	19.717	1.642	28.754	3.493	0.707	4.555	5.2e-6	8.4e-5
ENSG00000162873.14	KLHDC8A	1.421	0	2.131	1.647	1.729	4.552	5.3e-6	8.6e-5
ENSG00000156076.9	WIF1	4.532	0	6.798	2.963	1.92	4.551	5.4e-6	8.6e-5
ENSG00000133124.11	IRS4	9.574	0	14.361	3.941	2.46	4.549	5.4e-6	8.7e-5
ENSG00000072571.19	HMMR	6.129	0.646	8.87	2.584	0.759	4.545	5.5e-6	8.8e-5
ENSG00000161011.19	SQSTM1	200.286	331.768	134.546	-1.296	0.58	-4.545	5.5e-6	8.8e-5
ENSG00000214022.11	REPIN1	57.239	84.286	43.715	-0.932	0.461	-4.544	5.5e-6	8.9e-5
ENSG00000116096.5	SPR	13.312	23.062	8.437	-1.35	0.578	-4.542	5.6e-6	8.9e-5
ENSG00000101425.13	BPI	6.043	0.278	8.925	2.958	1.055	4.542	5.6e-6	8.9e-5
ENSG00000169762.16	TAPT1	26.258	34.786	21.994	-0.638	0.506	-4.542	5.6e-6	8.9e-5
ENSG00000206384.10	COL6A6	11.115	0.885	16.23	3.193	0.652	4.542	5.6e-6	8.9e-5
ENSG00000170779.10	CDCA4	12.536	1.1	18.254	3.197	0.625	4.54	5.6e-6	9.0e-5
ENSG00000087263.16	OGFOD1	22.601	35.445	16.178	-1.085	0.493	-4.54	5.6e-6	9.0e-5
ENSG00000281013.2	NDUFA6	60.199	119.428	30.585	-1.931	0.685	-4.539	5.6e-6	9.0e-5
ENSG00000204371.11	EHMT2	35.861	1.738	52.922	4.3	0.758	4.538	5.7e-6	9.1e-5
ENSG00000142046.14	TMEM91	46.58	3.321	68.21	4.002	0.746	4.538	5.7e-6	9.1e-5
ENSG00000233491.7	AC008163.1	1.297	0	1.945	1.558	1.702	4.537	5.7e-6	9.1e-5
ENSG00000132016.11	C19orf57	17.31	0.383	25.774	4.275	0.988	4.537	5.7e-6	9.1e-5
ENSG00000224458.3	GUSBP6	11.728	0	17.592	4.217	1.893	4.537	5.7e-6	9.1e-5
ENSG00000181773.6	GPR3	1.472	0	2.208	1.682	1.665	4.536	5.7e-6	9.1e-5
ENSG00000278704.1	BX004987.1	8.238	0.428	12.143	3.203	0.813	4.536	5.7e-6	9.1e-5
ENSG00000064726.9	BTBD1	69.829	104.702	52.392	-0.985	0.568	-4.536	5.7e-6	9.1e-5
ENSG00000198736.11	MSRB1	24.082	42.625	14.81	-1.464	0.619	-4.536	5.7e-6	9.1e-5
ENSG00000153291.15	SLC25A27	12.287	21.974	7.443	-1.444	0.637	-4.535	5.8e-6	9.1e-5
ENSG00000184254.16	ALDH1A3	66.558	4.638	97.518	4.127	0.696	4.534	5.8e-6	9.2e-5
ENSG00000150593.17	PDCD4	90.185	13.559	128.498	3.153	0.462	4.532	5.9e-6	9.3e-5
ENSG00000150760.12	DOCK1	31.201	2.914	45.345	3.566	0.53	4.528	5.9e-6	9.4e-5
ENSG00000099795.6	NDUFB7	319.786	561.89	198.734	-1.495	0.6	-4.526	6.0e-6	9.5e-5
ENSG00000139146.13	SINHCAF	20.2	1.464	29.567	3.633	0.748	4.525	6.0e-6	9.6e-5
ENSG00000187676.7	B3GLCT	21.468	1.639	31.382	3.617	0.684	4.524	6.1e-6	9.6e-5
ENSG00000241697.4	TMEFF1	1.62	0	2.43	1.778	1.773	4.523	6.1e-6	9.7e-5
ENSG00000139132.14	FGD4	2.301	3.219	1.842	-0.57	0.659	-4.521	6.1e-6	9.7e-5
ENSG00000105664.10	COMP	1.37	2.815	0.647	-1.211	0.988	-4.52	6.2e-6	9.8e-5
ENSG00000163689.20	C3orf67	2.411	0.056	3.588	2.119	1.249	4.52	6.2e-6	9.8e-5
ENSG00000185666.14	SYN3	12.029	0.371	17.858	3.782	0.928	4.519	6.2e-6	9.8e-5
ENSG00000173898.12	SPTBN2	9.176	0.993	13.268	2.84	0.922	4.518	6.2e-6	9.9e-5
ENSG00000139714.12	MORN3	2.275	0.044	3.391	2.073	0.987	4.518	6.2e-6	9.9e-5
ENSG00000004142.11	POLDIP2	60.72	94.79	43.685	-1.1	0.509	-4.518	6.2e-6	9.9e-5
ENSG00000097033.14	SH3GLB1	43.497	57.308	36.591	-0.633	0.508	-4.518	6.3e-6	9.9e-5
ENSG00000188878.19	FBF1	17.631	1.307	25.793	3.538	0.68	4.516	6.3e-6	9.9e-5
ENSG00000155961.4	RAB39B	1.021	0	1.532	1.34	1.744	4.515	6.3e-6	1.0e-4
ENSG00000187607.15	ZNF286A	35.868	4.548	51.527	3.243	0.541	4.513	6.4e-6	1.0e-4
ENSG00000160862.12	AZGP1	0.632	1.897	0	-1.535	1.72	-4.511	6.5e-6	1.0e-4
ENSG00000259660.2	DNM1P47	1.114	0.011	1.665	1.398	0.865	4.51	6.5e-6	1.0e-4
ENSG00000101782.14	RIOK3	21.987	28.834	18.564	-0.609	0.473	-4.509	6.5e-6	1.0e-4
ENSG00000183935.5	HTR7P1	1.524	0.12	2.226	1.527	0.667	4.508	6.5e-6	1.0e-4
ENSG00000135736.5	CCDC102A	16.033	1.458	23.321	3.307	0.6	4.508	6.5e-6	1.0e-4
ENSG00000163684.11	RPP14	12.379	18.006	9.566	-0.847	0.463	-4.507	6.6e-6	1.0e-4
ENSG00000149289.10	ZC3H12C	1.917	3.642	1.055	-1.176	0.688	-4.507	6.6e-6	1.0e-4
ENSG00000153113.23	CAST	40.808	70.96	25.733	-1.429	0.654	-4.507	6.6e-6	1.0e-4
ENSG00000111452.12	ADGRD1	2.458	4.891	1.241	-1.394	0.709	-4.506	6.6e-6	1.0e-4
ENSG00000196411.9	EPHB4	30.041	4.777	42.674	2.918	0.455	4.505	6.6e-6	1.0e-4
ENSG00000131203.12	IDO1	19.482	52.525	2.96	-3.757	1.126	-4.503	6.7e-6	1.0e-4
ENSG00000182218.9	HHIPL1	2.322	0.24	3.363	1.814	0.541	4.499	6.8e-6	1.1e-4
ENSG00000105750.14	ZNF85	8.042	1.228	11.448	2.482	0.564	4.497	6.9e-6	1.1e-4
ENSG00000219926.11	AL445238.1	12.626	0.491	18.693	3.724	0.802	4.497	6.9e-6	1.1e-4
ENSG00000166946.13	CCNDBP1	22.87	40.541	14.034	-1.466	0.623	-4.495	7.0e-6	1.1e-4
ENSG00000145794.16	MEGF10	1.38	3.446	0.347	-1.723	0.987	-4.494	7.0e-6	1.1e-4
ENSG00000159199.13	ATP5MC1	296.871	485.286	202.664	-1.256	0.61	-4.493	7.0e-6	1.1e-4
ENSG00000115457.9	IGFBP2	122.665	9.4	179.298	4.116	0.679	4.492	7.0e-6	1.1e-4
ENSG00000116141.15	MARK1	11.657	0.87	17.051	3.271	0.606	4.491	7.1e-6	1.1e-4
ENSG00000109689.15	STIM2	100.723	13.781	144.195	3.296	0.578	4.489	7.1e-6	1.1e-4
ENSG00000162545.5	CAMK2N1	3.535	6.676	1.964	-1.373	0.661	-4.489	7.2e-6	1.1e-4
ENSG00000146966.12	DENND2A	65.815	4.929	96.259	4.036	0.653	4.486	7.3e-6	1.1e-4
ENSG00000167191.11	GPRC5B	24.923	44.901	14.934	-1.526	0.709	-4.485	7.3e-6	1.1e-4
ENSG00000044524.10	EPHA3	13.889	0.795	20.437	3.578	0.788	4.485	7.3e-6	1.1e-4
ENSG00000139291.13	TMEM19	5.326	7.693	4.142	-0.757	0.597	-4.484	7.3e-6	1.1e-4
ENSG00000232926.1	AC000078.1	1.817	4.836	0.308	-2.158	1.15	-4.478	7.5e-6	1.2e-4
ENSG00000136010.13	ALDH1L2	0.575	0.78	0.472	-0.275	0.603	-4.477	7.6e-6	1.2e-4
ENSG00000173402.11	DAG1	29.288	53.442	17.21	-1.58	0.657	-4.477	7.6e-6	1.2e-4
ENSG00000214110.3	LDHAP4	11.335	0.505	16.749	3.56	0.871	4.475	7.6e-6	1.2e-4
ENSG00000172765.16	TMCC1	16.296	18.347	15.271	-0.25	0.474	-4.474	7.7e-6	1.2e-4
ENSG00000241837.6	ATP5PO	305.336	505.477	205.265	-1.296	0.577	-4.472	7.8e-6	1.2e-4
ENSG00000131828.13	PDHA1	180.872	261.207	140.705	-0.888	0.518	-4.471	7.8e-6	1.2e-4
ENSG00000162643.12	WDR63	2.815	0.012	4.217	2.366	1.61	4.466	8.0e-6	1.2e-4
ENSG00000147144.12	CCDC120	5.869	0.54	8.534	2.63	0.62	4.466	8.0e-6	1.2e-4
ENSG00000112619.7	PRPH2	1.932	5.03	0.384	-2.123	1.101	-4.464	8.0e-6	1.2e-4
ENSG00000173530.5	TNFRSF10D	10.339	0.453	15.283	3.486	0.872	4.462	8.1e-6	1.2e-4
ENSG00000113211.5	PCDHB6	1.707	0.137	2.493	1.62	0.684	4.462	8.1e-6	1.3e-4
ENSG00000169946.13	ZFPM2	7.64	7.612	7.654	0.007	0.499	-4.461	8.1e-6	1.3e-4
ENSG00000003137.8	CYP26B1	7.42	1.048	10.606	2.503	0.567	4.461	8.1e-6	1.3e-4
ENSG00000182010.10	RTKN2	1.966	0.142	2.877	1.763	0.84	4.459	8.2e-6	1.3e-4
ENSG00000106993.11	CDC37L1	13.376	20.126	10.001	-0.941	0.507	-4.459	8.2e-6	1.3e-4
ENSG00000196712.17	NF1	4.188	3.824	4.369	0.154	0.51	-4.458	8.3e-6	1.3e-4
ENSG00000165359.15	INTS6L	15.89	1.891	22.889	3.047	0.611	4.457	8.3e-6	1.3e-4
ENSG00000134256.12	CD101	33.011	4.404	47.314	3.16	0.715	4.456	8.4e-6	1.3e-4
ENSG00000166851.14	PLK1	10.449	0.501	15.423	3.451	0.714	4.449	8.6e-6	1.3e-4
ENSG00000119408.16	NEK6	16.872	1.747	24.435	3.211	0.596	4.449	8.6e-6	1.3e-4
ENSG00000114738.10	MAPKAPK3	24.597	44.616	14.588	-1.549	0.645	-4.449	8.6e-6	1.3e-4
ENSG00000131018.22	SYNE1	13.069	19.512	9.847	-0.919	0.503	-4.448	8.7e-6	1.3e-4
ENSG00000182796.14	TMEM198B	105.131	9.632	152.881	3.855	0.68	4.447	8.7e-6	1.3e-4
ENSG00000275365.3	MMP11	8.106	1.095	11.611	2.59	0.648	4.447	8.7e-6	1.3e-4
ENSG00000144746.6	ARL6IP5	60.52	134.07	23.746	-2.448	0.819	-4.446	8.7e-6	1.3e-4
ENSG00000152932.7	RAB3C	2.561	0.016	3.833	2.251	1.041	4.446	8.8e-6	1.3e-4
ENSG00000180758.11	GPR157	7.806	12.426	5.496	-1.048	0.601	-4.445	8.8e-6	1.3e-4
ENSG00000133119.12	RFC3	21.724	2.249	31.461	3.321	0.678	4.443	8.9e-6	1.4e-4
ENSG00000073756.11	PTGS2	2.547	0.292	3.674	1.855	0.782	4.442	8.9e-6	1.4e-4
ENSG00000181754.6	AMIGO1	2.945	4.929	1.953	-1.006	0.573	-4.44	9.0e-6	1.4e-4
ENSG00000184232.8	OAF	106.97	12.655	154.128	3.506	0.543	4.44	9.0e-6	1.4e-4
ENSG00000004468.12	CD38	3.888	8.289	1.687	-1.789	0.799	-4.44	9.0e-6	1.4e-4
ENSG00000152689.17	RASGRP3	10.895	20.136	6.274	-1.539	0.538	-4.437	9.1e-6	1.4e-4
ENSG00000178538.9	CA8	11.222	0.841	16.413	3.241	0.54	4.437	9.1e-6	1.4e-4
ENSG00000256984.2	AC008013.2	79.578	0.322	119.206	6.506	1.676	4.437	9.1e-6	1.4e-4
ENSG00000167815.11	PRDX2	182.812	281.026	133.705	-1.066	0.518	-4.436	9.2e-6	1.4e-4
ENSG00000125355.15	TMEM255A	0.498	1.071	0.211	-0.774	0.853	-4.435	9.2e-6	1.4e-4
ENSG00000026652.13	AGPAT4	7.614	0.747	11.047	2.786	0.603	4.434	9.2e-6	1.4e-4
ENSG00000005075.15	POLR2J	91.511	146.589	63.972	-1.184	0.543	-4.434	9.3e-6	1.4e-4
ENSG00000280518.1	AC244260.1	1.219	6.0e-6	1.829	1.5	1.745	4.432	9.3e-6	1.4e-4
ENSG00000213413.2	PVRIG	12.506	24.939	6.289	-1.831	0.642	-4.428	9.5e-6	1.4e-4
ENSG00000260914.3	AC026464.4	26.275	50.181	14.322	-1.74	0.682	-4.427	9.5e-6	1.4e-4
ENSG00000205795.4	CYS1	1.047	2.48	0.331	-1.387	0.906	-4.426	9.6e-6	1.5e-4
ENSG00000125037.12	EMC3	59.759	103.806	37.735	-1.436	0.548	-4.426	9.6e-6	1.5e-4
ENSG00000116005.11	PCYOX1	16.119	29.656	9.351	-1.566	0.691	-4.424	9.7e-6	1.5e-4
ENSG00000183765.20	CHEK2	26.492	2.136	38.669	3.661	0.698	4.423	9.7e-6	1.5e-4
ENSG00000080986.12	NDC80	18.626	1.441	27.218	3.531	0.723	4.422	9.8e-6	1.5e-4
ENSG00000108821.13	COL1A1	475.451	24.098	701.128	4.806	0.842	4.42	9.9e-6	1.5e-4
ENSG00000154370.15	TRIM11	18.827	2.719	26.881	2.906	0.543	4.42	9.9e-6	1.5e-4
ENSG00000226085.3	UQCRFS1P1	6.338	14.946	2.035	-2.394	0.925	-4.415	1.0e-5	1.5e-4
ENSG00000125844.15	RRBP1	81.734	12.524	116.339	3.117	0.461	4.415	1.0e-5	1.5e-4
ENSG00000147180.16	ZNF711	12.294	1.325	17.779	3.014	0.576	4.414	1.0e-5	1.5e-4
ENSG00000107954.10	NEURL1	20.622	43.503	9.181	-2.128	0.596	-4.413	1.0e-5	1.5e-4
ENSG00000088305.18	DNMT3B	3.956	0.251	5.808	2.444	0.824	4.412	1.0e-5	1.5e-4
ENSG00000152128.13	TMEM163	2.181	0.026	3.259	2.053	1.273	4.412	1.0e-5	1.5e-4
ENSG00000026297.15	RNASET2	68.512	8.463	98.536	3.395	0.589	4.411	1.0e-5	1.5e-4
ENSG00000175643.8	RMI2	7.645	0.777	11.079	2.765	0.673	4.409	1.0e-5	1.6e-4
ENSG00000160194.17	NDUFV3	24.945	32.444	21.196	-0.591	0.471	-4.409	1.0e-5	1.6e-4
ENSG00000154511.11	FAM69A	4.588	6.089	3.838	-0.551	0.583	-4.408	1.0e-5	1.6e-4
ENSG00000136379.11	ABHD17C	4.735	0.541	6.833	2.346	0.585	4.406	1.1e-5	1.6e-4
ENSG00000165480.15	SKA3	3.154	0.122	4.671	2.338	0.874	4.405	1.1e-5	1.6e-4
ENSG00000163631.16	ALB	4.226	0.025	6.326	2.837	1.66	4.405	1.1e-5	1.6e-4
ENSG00000128011.4	LRFN1	1.888	0.072	2.796	1.824	0.891	4.403	1.1e-5	1.6e-4
ENSG00000164796.17	CSMD3	1.573	0.105	2.307	1.582	0.783	4.402	1.1e-5	1.6e-4
ENSG00000163376.11	KBTBD8	0.689	1.022	0.523	-0.409	0.756	-4.402	1.1e-5	1.6e-4
ENSG00000166912.16	MTMR10	11.247	15.061	9.34	-0.635	0.45	-4.401	1.1e-5	1.6e-4
ENSG00000258790.1	AL121594.1	3.055	0.185	4.489	2.211	0.783	4.399	1.1e-5	1.6e-4
ENSG00000164488.11	DACT2	0.553	1.294	0.182	-0.956	0.983	-4.399	1.1e-5	1.6e-4
ENSG00000139180.10	NDUFA9	89.524	133.487	67.542	-0.972	0.534	-4.398	1.1e-5	1.6e-4
ENSG00000260802.1	SERTM2	1.207	0	1.811	1.491	1.912	4.397	1.1e-5	1.6e-4
ENSG00000171159.4	C9orf16	139.478	12.616	202.91	3.905	0.632	4.396	1.1e-5	1.6e-4
ENSG00000197472.14	ZNF695	5.659	0.284	8.347	2.863	1.071	4.394	1.1e-5	1.7e-4
ENSG00000013810.18	TACC3	37.545	2.742	54.947	3.902	0.682	4.394	1.1e-5	1.7e-4
ENSG00000137941.16	TTLL7	3.027	4.234	2.423	-0.613	0.61	-4.392	1.1e-5	1.7e-4
ENSG00000214897.4	PNMA6E	12.367	0	18.55	4.289	2.482	4.389	1.1e-5	1.7e-4
ENSG00000196526.10	AFAP1	19.66	2.985	27.997	2.863	0.625	4.389	1.1e-5	1.7e-4
ENSG00000154822.17	PLCL2	5.559	10.365	3.156	-1.451	0.66	-4.388	1.1e-5	1.7e-4
ENSG00000111012.9	CYP27B1	3.365	0.009	5.044	2.582	1.59	4.387	1.1e-5	1.7e-4
ENSG00000177380.13	PPFIA3	16.944	1.701	24.565	3.243	0.626	4.386	1.2e-5	1.7e-4
ENSG00000181031.15	RPH3AL	4.397	9.088	2.052	-1.725	0.732	-4.386	1.2e-5	1.7e-4
ENSG00000105993.14	DNAJB6	101.173	123.186	90.166	-0.446	0.487	-4.382	1.2e-5	1.7e-4
ENSG00000127586.16	CHTF18	124.477	4.113	184.66	5.182	0.911	4.381	1.2e-5	1.8e-4
ENSG00000176293.19	ZNF135	9.51	1.176	13.677	2.754	0.553	4.38	1.2e-5	1.8e-4
ENSG00000137269.14	LRRC1	5.851	0.498	8.528	2.669	0.586	4.378	1.2e-5	1.8e-4
ENSG00000176716.5	OR10AB1P	0.837	2.122	0.195	-1.385	1.048	-4.378	1.2e-5	1.8e-4
ENSG00000267534.3	S1PR2	11.812	0.999	17.219	3.188	0.662	4.377	1.2e-5	1.8e-4
ENSG00000120889.12	TNFRSF10B	38.494	5.094	55.194	3.205	0.61	4.375	1.2e-5	1.8e-4
ENSG00000262334.6	RPH3AL	2.154	3.825	1.319	-1.057	0.685	-4.374	1.2e-5	1.8e-4
ENSG00000007171.17	NOS2	3.104	0.115	4.598	2.328	0.976	4.374	1.2e-5	1.8e-4
ENSG00000159461.14	AMFR	27.212	40.062	20.787	-0.914	0.586	-4.373	1.2e-5	1.8e-4
ENSG00000173258.12	ZNF483	1.926	0.081	2.848	1.832	0.849	4.373	1.2e-5	1.8e-4
ENSG00000101842.13	VSIG1	1.943	0.03	2.899	1.921	1.191	4.372	1.2e-5	1.8e-4
ENSG00000179766.18	ATP8B5P	0.261	0.621	0.08	-0.585	0.97	-4.371	1.2e-5	1.8e-4
ENSG00000130024.14	PHF10	28.029	39.516	22.285	-0.799	0.53	-4.371	1.2e-5	1.8e-4
ENSG00000075336.11	TIMM21	30.062	35.888	27.149	-0.39	0.471	-4.371	1.2e-5	1.8e-4
ENSG00000140403.12	DNAJA4	28.792	52.031	17.173	-1.545	0.706	-4.371	1.2e-5	1.8e-4
ENSG00000111231.8	GPN3	20.43	32.06	14.615	-1.082	0.56	-4.371	1.2e-5	1.8e-4
ENSG00000160999.10	SH2B2	11.681	22.467	6.288	-1.687	0.731	-4.368	1.3e-5	1.8e-4
ENSG00000034152.18	MAP2K3	26.775	41.761	19.282	-1.076	0.576	-4.366	1.3e-5	1.9e-4
ENSG00000185480.11	PARPBP	6.256	0.83	8.969	2.446	0.583	4.365	1.3e-5	1.9e-4
ENSG00000059573.8	ALDH18A1	24.4	2.652	35.274	3.312	0.573	4.364	1.3e-5	1.9e-4
ENSG00000140104.13	CLBA1	11.882	1.142	17.252	3.091	0.656	4.363	1.3e-5	1.9e-4
ENSG00000123095.5	BHLHE41	13.695	26.107	7.489	-1.675	0.771	-4.363	1.3e-5	1.9e-4
ENSG00000124613.8	ZNF391	3.76	0.816	5.232	1.779	0.555	4.362	1.3e-5	1.9e-4
ENSG00000224014.1	AL390728.3	145.106	1.103	217.107	6.696	1.465	4.361	1.3e-5	1.9e-4
ENSG00000163319.10	MRPS18C	35.782	49.588	28.879	-0.76	0.499	-4.361	1.3e-5	1.9e-4
ENSG00000128609.14	NDUFA5	91.232	153.678	60.009	-1.342	0.605	-4.361	1.3e-5	1.9e-4
ENSG00000169410.9	PTPN9	39.035	4.367	56.369	3.418	0.585	4.359	1.3e-5	1.9e-4
ENSG00000197885.10	NKIRAS1	9.982	14.341	7.803	-0.801	0.478	-4.359	1.3e-5	1.9e-4
ENSG00000011638.10	TMEM159	44.26	96.102	18.339	-2.328	0.8	-4.359	1.3e-5	1.9e-4
ENSG00000140937.13	CDH11	30.768	1.526	45.389	4.199	0.874	4.358	1.3e-5	1.9e-4
ENSG00000185920.15	PTCH1	34.512	2.204	50.665	4.011	0.831	4.358	1.3e-5	1.9e-4
ENSG00000140043.11	PTGR2	10.258	16.834	6.971	-1.162	0.514	-4.358	1.3e-5	1.9e-4
ENSG00000233345.9	MSH5	7.299	1.133	10.381	2.416	0.859	4.357	1.3e-5	1.9e-4
ENSG00000204370.10	SDHD	97.093	184.463	53.408	-1.769	0.691	-4.356	1.3e-5	1.9e-4
ENSG00000184811.3	TUSC5	0.179	0.487	0.025	-0.538	1.24	-4.355	1.3e-5	1.9e-4
ENSG00000167077.12	MEI1	20.868	1.277	30.664	3.798	0.855	4.355	1.3e-5	1.9e-4
ENSG00000138768.14	USO1	50.664	79.482	36.255	-1.111	0.547	-4.354	1.3e-5	1.9e-4
ENSG00000198925.11	ATG9A	31.05	41.264	25.943	-0.65	0.479	-4.353	1.3e-5	1.9e-4
ENSG00000162390.17	ACOT11	7.399	15.214	3.492	-1.852	0.564	-4.352	1.3e-5	2.0e-4
ENSG00000087077.13	TRIP6	84.56	8.726	122.478	3.666	0.56	4.352	1.3e-5	2.0e-4
ENSG00000146285.13	SCML4	5.628	0.14	8.371	3.039	0.997	4.352	1.4e-5	2.0e-4
ENSG00000136490.8	LIMD2	34.817	1.763	51.343	4.244	0.888	4.35	1.4e-5	2.0e-4
ENSG00000187867.8	PALM3	2.899	0.026	4.335	2.378	1.261	4.349	1.4e-5	2.0e-4
ENSG00000164967.9	RPP25L	38.982	68.867	24.04	-1.48	0.618	-4.348	1.4e-5	2.0e-4
ENSG00000125434.10	SLC25A35	10.475	0.953	15.235	3.055	0.771	4.347	1.4e-5	2.0e-4
ENSG00000185112.5	FAM43A	52.33	6.478	75.255	3.35	0.539	4.347	1.4e-5	2.0e-4
ENSG00000159184.7	HOXB13	11.255	0.468	16.649	3.588	0.94	4.346	1.4e-5	2.0e-4
ENSG00000119729.11	RHOQ	47.887	84.991	29.335	-1.503	0.645	-4.346	1.4e-5	2.0e-4
ENSG00000141519.14	CCDC40	20.375	0.766	30.18	4.142	0.936	4.344	1.4e-5	2.0e-4
ENSG00000168899.4	VAMP5	110.024	248.92	40.575	-2.588	0.88	-4.341	1.4e-5	2.0e-4
ENSG00000103855.17	CD276	57.369	6.493	82.807	3.484	0.573	4.34	1.4e-5	2.1e-4
ENSG00000178921.13	PFAS	28.997	3.99	41.5	3.09	0.545	4.339	1.4e-5	2.1e-4
ENSG00000197406.7	DIO3	0.76	1.796	0.242	-1.171	0.96	-4.339	1.4e-5	2.1e-4
ENSG00000116688.16	MFN2	61.771	88.186	48.563	-0.848	0.437	-4.338	1.4e-5	2.1e-4
ENSG00000282933.2	RHOXF1P3	8.951	0.225	13.313	3.546	1.036	4.338	1.4e-5	2.1e-4
ENSG00000147592.8	LACTB2	13.393	20.051	10.063	-0.928	0.538	-4.337	1.4e-5	2.1e-4
ENSG00000175556.16	LONRF3	0.555	1.258	0.204	-0.908	0.872	-4.337	1.4e-5	2.1e-4
ENSG00000115232.13	ITGA4	4.927	0.26	7.261	2.713	0.829	4.336	1.5e-5	2.1e-4
ENSG00000118733.16	OLFM3	2.041	0	3.061	2.022	1.92	4.336	1.5e-5	2.1e-4
ENSG00000166971.16	AKTIP	23.608	47.803	11.511	-1.964	0.769	-4.335	1.5e-5	2.1e-4
ENSG00000198920.9	KIAA0753	14.022	1.539	20.264	3.066	0.638	4.333	1.5e-5	2.1e-4
ENSG00000051341.13	POLQ	2.061	0.393	2.895	1.484	0.816	4.333	1.5e-5	2.1e-4
ENSG00000168575.9	SLC20A2	40.621	44.616	38.624	-0.203	0.501	-4.332	1.5e-5	2.1e-4
ENSG00000203819.6	HIST2H2BC	27.299	0.778	40.56	4.546	1.082	4.332	1.5e-5	2.1e-4
ENSG00000163006.11	CCDC138	6.851	0.53	10.011	2.848	0.635	4.332	1.5e-5	2.1e-4
ENSG00000176204.13	LRRTM4	2.965	2.161	3.367	0.466	0.858	-4.331	1.5e-5	2.1e-4
ENSG00000139083.10	ETV6	14.758	1.354	21.46	3.254	0.601	4.331	1.5e-5	2.1e-4
ENSG00000196935.8	SRGAP1	5.66	0.593	8.193	2.529	0.601	4.329	1.5e-5	2.1e-4
ENSG00000141526.16	SLC16A3	19.055	39.629	8.769	-2.056	0.726	-4.328	1.5e-5	2.1e-4
ENSG00000168487.17	BMP1	32.508	4.427	46.549	3.131	0.616	4.326	1.5e-5	2.2e-4
ENSG00000221829.9	FANCG	51.579	5.684	74.527	3.498	0.552	4.326	1.5e-5	2.2e-4
ENSG00000153721.18	CNKSR3	9.256	0.759	13.505	3.043	0.634	4.325	1.5e-5	2.2e-4
ENSG00000140323.5	DISP2	2.69	0.079	3.995	2.211	0.619	4.325	1.5e-5	2.2e-4
ENSG00000167747.14	C19orf48	52.968	7.075	75.915	3.252	0.597	4.325	1.5e-5	2.2e-4
ENSG00000162745.10	OLFML2B	84.917	6.059	124.346	4.15	0.769	4.324	1.5e-5	2.2e-4
ENSG00000138801.8	PAPSS1	39.296	4.135	56.877	3.495	0.597	4.322	1.5e-5	2.2e-4
ENSG00000136111.12	TBC1D4	21.783	34.208	15.57	-1.087	0.55	-4.321	1.6e-5	2.2e-4
ENSG00000204764.13	RANBP17	14.535	1.464	21.071	3.163	0.762	4.32	1.6e-5	2.2e-4
ENSG00000106484.15	MEST	160.298	3.761	238.566	5.653	1.11	4.319	1.6e-5	2.2e-4
ENSG00000109762.15	SNX25	2.506	3.885	1.816	-0.794	0.537	-4.318	1.6e-5	2.2e-4
ENSG00000137801.10	THBS1	20.174	0.848	29.838	4.061	0.777	4.317	1.6e-5	2.2e-4
ENSG00000184530.8	C6orf58	6.333	0.472	9.263	2.801	1.277	4.316	1.6e-5	2.3e-4
ENSG00000134243.11	SORT1	11.816	16.895	9.276	-0.8	0.552	-4.314	1.6e-5	2.3e-4
ENSG00000244486.8	SCARF2	15.231	1.323	22.185	3.319	0.657	4.313	1.6e-5	2.3e-4
ENSG00000151067.21	CACNA1C	7.387	0.881	10.639	2.629	0.728	4.312	1.6e-5	2.3e-4
ENSG00000261217.2	BCAP31P1	4.236	11.728	0.49	-3.095	1.392	-4.311	1.6e-5	2.3e-4
ENSG00000144583.4	MARCH4	1.337	0	2.005	1.587	2.006	4.308	1.7e-5	2.3e-4
ENSG00000232388.4	SMIM26	140.465	224.462	98.467	-1.181	0.557	-4.307	1.7e-5	2.3e-4
ENSG00000134294.13	SLC38A2	80.892	134.709	53.984	-1.303	0.598	-4.306	1.7e-5	2.3e-4
ENSG00000142507.9	PSMB6	147.391	217.95	112.112	-0.953	0.507	-4.305	1.7e-5	2.4e-4
ENSG00000162692.10	VCAM1	19.795	2.134	28.626	3.241	0.595	4.305	1.7e-5	2.4e-4
ENSG00000124593.16	AL365205.1	32.871	2.801	47.906	3.685	0.688	4.305	1.7e-5	2.4e-4
ENSG00000282181.1	MROH5	1.934	4.358	0.723	-1.637	0.869	-4.302	1.7e-5	2.4e-4
ENSG00000178307.9	TMEM11	33.72	55.59	22.784	-1.251	0.567	-4.302	1.7e-5	2.4e-4
ENSG00000197444.9	OGDHL	4.6	0.047	6.877	2.912	1.388	4.302	1.7e-5	2.4e-4
ENSG00000276547.1	PCDHGB5	0.246	0.518	0.11	-0.452	0.94	-4.3	1.7e-5	2.4e-4
ENSG00000132164.9	SLC6A11	1.433	0.01	2.144	1.639	1.584	4.299	1.7e-5	2.4e-4
ENSG00000103184.11	SEC14L5	0.642	1.279	0.324	-0.784	0.691	-4.299	1.7e-5	2.4e-4
ENSG00000157423.17	HYDIN	2.263	0.013	3.387	2.114	1.409	4.298	1.7e-5	2.4e-4
ENSG00000128655.17	PDE11A	1.449	2.73	0.808	-1.045	0.809	-4.298	1.7e-5	2.4e-4
ENSG00000138709.17	LARP1B	4.61	6.853	3.489	-0.807	0.509	-4.297	1.7e-5	2.4e-4
ENSG00000196118.11	CCDC189	24.151	0.729	35.862	4.414	1.019	4.296	1.7e-5	2.4e-4
ENSG00000145990.10	GFOD1	1.708	2.888	1.117	-0.877	0.62	-4.296	1.7e-5	2.4e-4
ENSG00000275340.1	FGD5P1	1.338	0.028	1.993	1.542	1.147	4.296	1.7e-5	2.4e-4
ENSG00000213185.6	FAM24B	17.582	0.874	25.936	3.845	0.843	4.295	1.7e-5	2.4e-4
ENSG00000184831.13	APOO	28.457	35.948	24.711	-0.523	0.544	-4.295	1.7e-5	2.4e-4
ENSG00000226025.9	AC005515.1	1.543	3.326	0.651	-1.389	1.211	-4.295	1.7e-5	2.4e-4
ENSG00000250183.2	AC097173.1	0.587	1.761	0	-1.465	1.747	-4.294	1.8e-5	2.5e-4
ENSG00000119636.15	BBOF1	10.152	1.298	14.579	2.761	0.536	4.294	1.8e-5	2.5e-4
ENSG00000167208.14	SNX20	2.376	5.601	0.763	-1.905	0.824	-4.294	1.8e-5	2.5e-4
ENSG00000001561.6	ENPP4	4.291	11.341	0.766	-2.805	1.177	-4.294	1.8e-5	2.5e-4
ENSG00000092978.10	GPATCH2	14.899	2.176	21.261	2.809	0.472	4.292	1.8e-5	2.5e-4
ENSG00000239900.12	ADSL	97.18	156.931	67.305	-1.209	0.662	-4.289	1.8e-5	2.5e-4
ENSG00000259171.1	AL163636.2	0.934	2.256	0.273	-1.355	0.99	-4.289	1.8e-5	2.5e-4
ENSG00000184207.8	PGP	10.634	16.419	7.741	-0.995	0.528	-4.287	1.8e-5	2.5e-4
ENSG00000176692.5	FOXC2	6.493	0.293	9.592	3.034	0.926	4.286	1.8e-5	2.5e-4
ENSG00000225351.4	ZNF311	0.792	0	1.188	1.13	1.669	4.286	1.8e-5	2.5e-4
ENSG00000131188.11	PRR7	5.871	0.38	8.616	2.801	0.787	4.286	1.8e-5	2.5e-4
ENSG00000173531.15	MST1	140.689	4.916	208.576	5.147	0.877	4.285	1.8e-5	2.5e-4
ENSG00000108231.12	LGI1	5.526	11.984	2.297	-1.978	0.699	-4.284	1.8e-5	2.5e-4
ENSG00000112541.13	PDE10A	8.669	1.543	12.232	2.379	0.81	4.282	1.9e-5	2.6e-4
ENSG00000112936.18	C7	2.093	2.745	1.767	-0.437	0.752	-4.28	1.9e-5	2.6e-4
ENSG00000105518.13	TMEM205	39.645	72.224	23.356	-1.588	0.625	-4.278	1.9e-5	2.6e-4
ENSG00000109113.19	RAB34	123.92	13.854	178.953	3.599	0.532	4.277	1.9e-5	2.6e-4
ENSG00000147231.13	CXorf57	2.039	4.489	0.813	-1.598	0.812	-4.276	1.9e-5	2.6e-4
ENSG00000062524.15	LTK	4.583	0.473	6.638	2.375	1.237	4.272	1.9e-5	2.7e-4
ENSG00000196950.13	SLC39A10	25.062	5.432	34.878	2.48	0.543	4.271	1.9e-5	2.7e-4
ENSG00000198520.10	C1orf228	26.066	1.2	38.499	4.166	1.014	4.271	1.9e-5	2.7e-4
ENSG00000183036.10	PCP4	11.307	0	16.96	4.167	1.934	4.27	2.0e-5	2.7e-4
ENSG00000102897.9	LYRM1	21.027	30.53	16.275	-0.868	0.496	-4.27	2.0e-5	2.7e-4
ENSG00000165588.16	OTX2	2.559	0	3.838	2.274	1.992	4.27	2.0e-5	2.7e-4
ENSG00000180998.11	GPR137C	10.041	0.613	14.754	3.288	0.632	4.27	2.0e-5	2.7e-4
ENSG00000104140.6	RHOV	1.753	0	2.629	1.86	1.756	4.268	2.0e-5	2.7e-4
ENSG00000143375.14	CGN	2.67	0.252	3.879	1.963	0.89	4.267	2.0e-5	2.7e-4
ENSG00000070540.12	WIPI1	28.521	47.264	19.15	-1.26	0.661	-4.267	2.0e-5	2.7e-4
ENSG00000103035.10	PSMD7	68.871	104.154	51.23	-1.01	0.534	-4.265	2.0e-5	2.8e-4
ENSG00000135587.8	SMPD2	16.098	1.329	23.482	3.394	0.655	4.265	2.0e-5	2.8e-4
ENSG00000182195.7	LDOC1	42.946	3.284	62.777	3.896	0.67	4.265	2.0e-5	2.8e-4
ENSG00000109103.11	UNC119	28.176	2.888	40.82	3.427	0.565	4.264	2.0e-5	2.8e-4
ENSG00000050730.15	TNIP3	6.603	0.105	9.852	3.296	1.321	4.264	2.0e-5	2.8e-4
ENSG00000187800.13	PEAR1	17.478	2.712	24.86	2.8	0.479	4.264	2.0e-5	2.8e-4
ENSG00000151458.11	ANKRD50	9.756	0.881	14.194	3.014	0.646	4.26	2.0e-5	2.8e-4
ENSG00000165672.6	PRDX3	130.141	205.229	92.597	-1.14	0.549	-4.26	2.0e-5	2.8e-4
ENSG00000107105.14	ELAVL2	2.987	0.229	4.366	2.126	1.138	4.259	2.1e-5	2.8e-4
ENSG00000077782.19	FGFR1	282.208	22.445	412.09	4.139	0.662	4.257	2.1e-5	2.8e-4
ENSG00000186687.15	LYRM7	7.499	10.679	5.909	-0.757	0.547	-4.255	2.1e-5	2.9e-4
ENSG00000204351.11	SKIV2L	19.138	3.757	26.829	2.548	0.527	4.255	2.1e-5	2.9e-4
ENSG00000267594.5	CYP4F24P	8.861	0.167	13.208	3.605	1.203	4.255	2.1e-5	2.9e-4
ENSG00000250575.1	AL732372.3	19.695	0.843	29.122	4.031	0.938	4.25	2.1e-5	2.9e-4
ENSG00000167994.11	RAB3IL1	54.636	7.397	78.256	3.239	0.5	4.248	2.2e-5	2.9e-4
ENSG00000106771.12	TMEM245	11.96	17.895	8.992	-0.919	0.564	-4.248	2.2e-5	2.9e-4
ENSG00000164877.18	MICALL2	27.234	1.074	40.315	4.316	0.7	4.248	2.2e-5	2.9e-4
ENSG00000275713.2	HIST1H2BH	1.833	0	2.749	1.907	1.856	4.248	2.2e-5	2.9e-4
ENSG00000259658.5	AC027559.1	25.552	1.473	37.591	3.964	0.786	4.248	2.2e-5	2.9e-4
ENSG00000160282.13	FTCD	11.824	0.143	17.665	4.03	0.963	4.246	2.2e-5	3.0e-4
ENSG00000111799.20	COL12A1	91.404	10.72	131.746	3.502	0.593	4.246	2.2e-5	3.0e-4
ENSG00000090266.12	NDUFB2	544.28	965.963	333.438	-1.532	0.632	-4.246	2.2e-5	3.0e-4
ENSG00000106809.10	OGN	151.585	6.599	224.078	4.889	0.905	4.246	2.2e-5	3.0e-4
ENSG00000172215.5	CXCR6	1.392	3.195	0.49	-1.493	1.004	-4.244	2.2e-5	3.0e-4
ENSG00000123545.5	NDUFAF4	35.228	36.417	34.634	-0.07	0.474	-4.243	2.2e-5	3.0e-4
ENSG00000186715.10	MST1L	9.834	0.262	14.619	3.63	1.023	4.242	2.2e-5	3.0e-4
ENSG00000157514.16	TSC22D3	76.856	138.906	45.83	-1.579	0.677	-4.241	2.2e-5	3.0e-4
ENSG00000096968.13	JAK2	6.228	9.693	4.496	-0.96	0.579	-4.24	2.2e-5	3.0e-4
ENSG00000100307.12	CBX7	14.936	29.541	7.633	-1.823	0.801	-4.239	2.2e-5	3.0e-4
ENSG00000150527.17	CTAGE5	19.032	21.002	18.047	-0.208	0.469	-4.238	2.3e-5	3.1e-4
ENSG00000174502.18	SLC26A9	0.558	1.168	0.254	-0.79	1.31	-4.236	2.3e-5	3.1e-4
ENSG00000203814.6	HIST2H2BF	8.369	0.222	12.443	3.459	0.975	4.235	2.3e-5	3.1e-4
ENSG00000162687.16	KCNT2	3.543	0.488	5.07	2.028	0.528	4.235	2.3e-5	3.1e-4
ENSG00000162552.14	WNT4	0.602	1.117	0.345	-0.655	0.79	-4.234	2.3e-5	3.1e-4
ENSG00000125046.14	SSUH2	43.698	0.583	65.255	5.387	0.89	4.234	2.3e-5	3.1e-4
ENSG00000015153.14	YAF2	12.585	15.891	10.931	-0.502	0.471	-4.233	2.3e-5	3.1e-4
ENSG00000173812.10	EIF1	690.912	1178.12	447.311	-1.395	0.59	-4.232	2.3e-5	3.1e-4
ENSG00000231925.11	TAPBP	1.421	0	2.132	1.647	1.728	4.23	2.3e-5	3.2e-4
ENSG00000165379.13	LRFN5	5.433	0.242	8.028	2.861	0.869	4.227	2.4e-5	3.2e-4
[truncated: 25,558 more rows]
