# Supplementary material
Source: Research Square preprint supplement (doi:10.21203/rs.3.rs-9404926/v1)

# Supplementary Figure 1

## A Case1; OICI-MPNST-1034

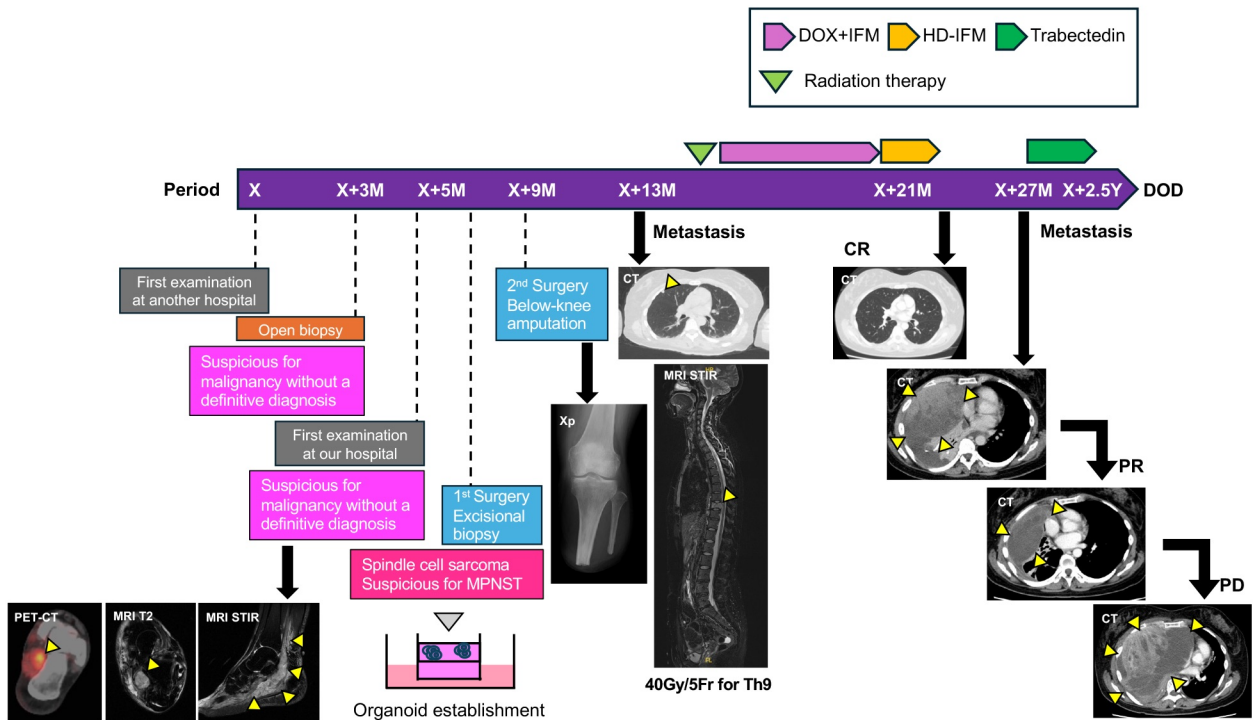

## B Case2; OICI-MPNST-1325

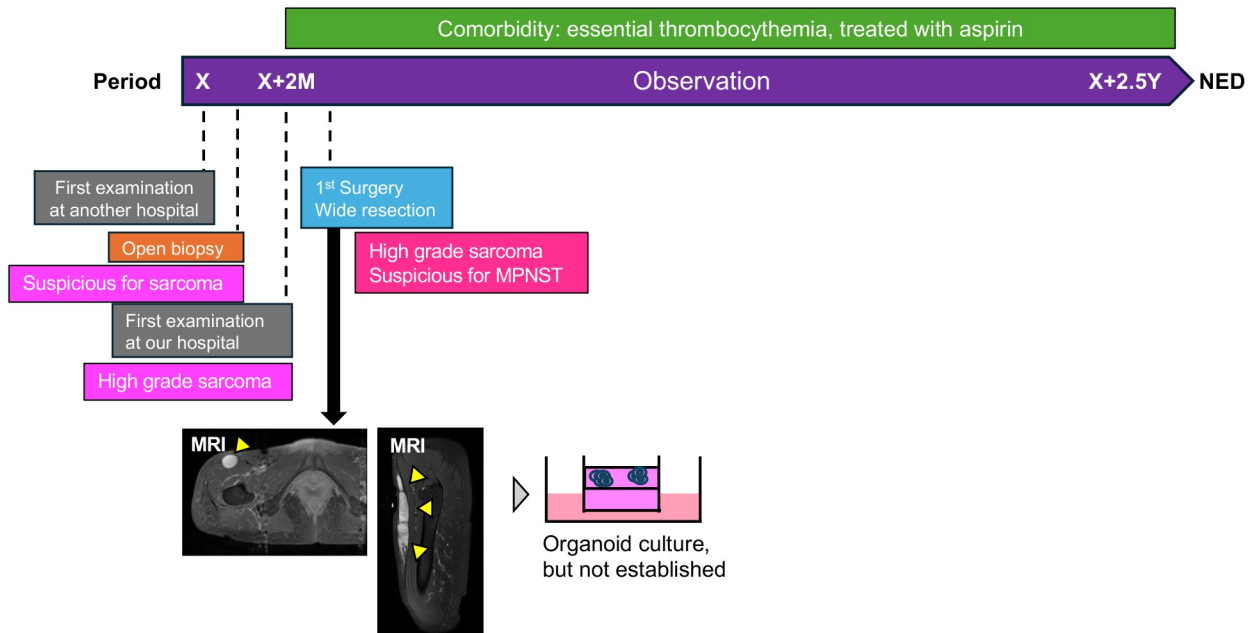

# Supplementary Figure 2

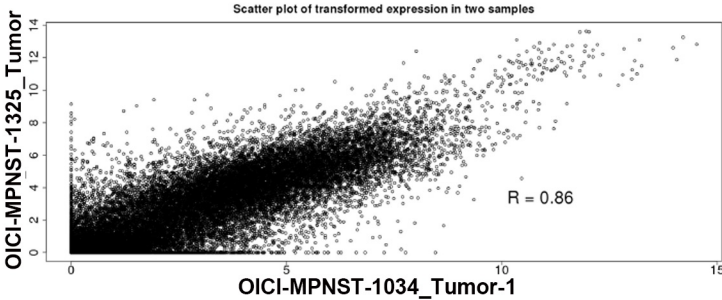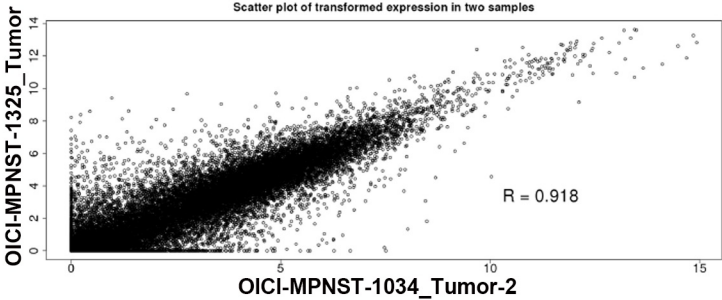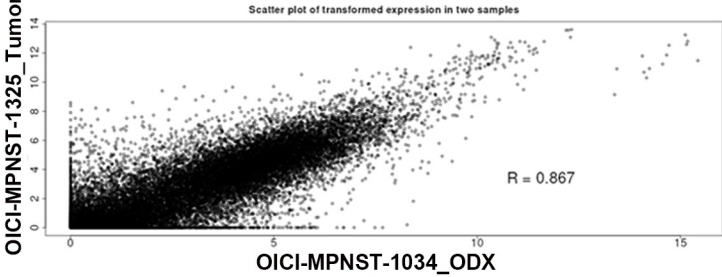

# Supplementary Figure 3

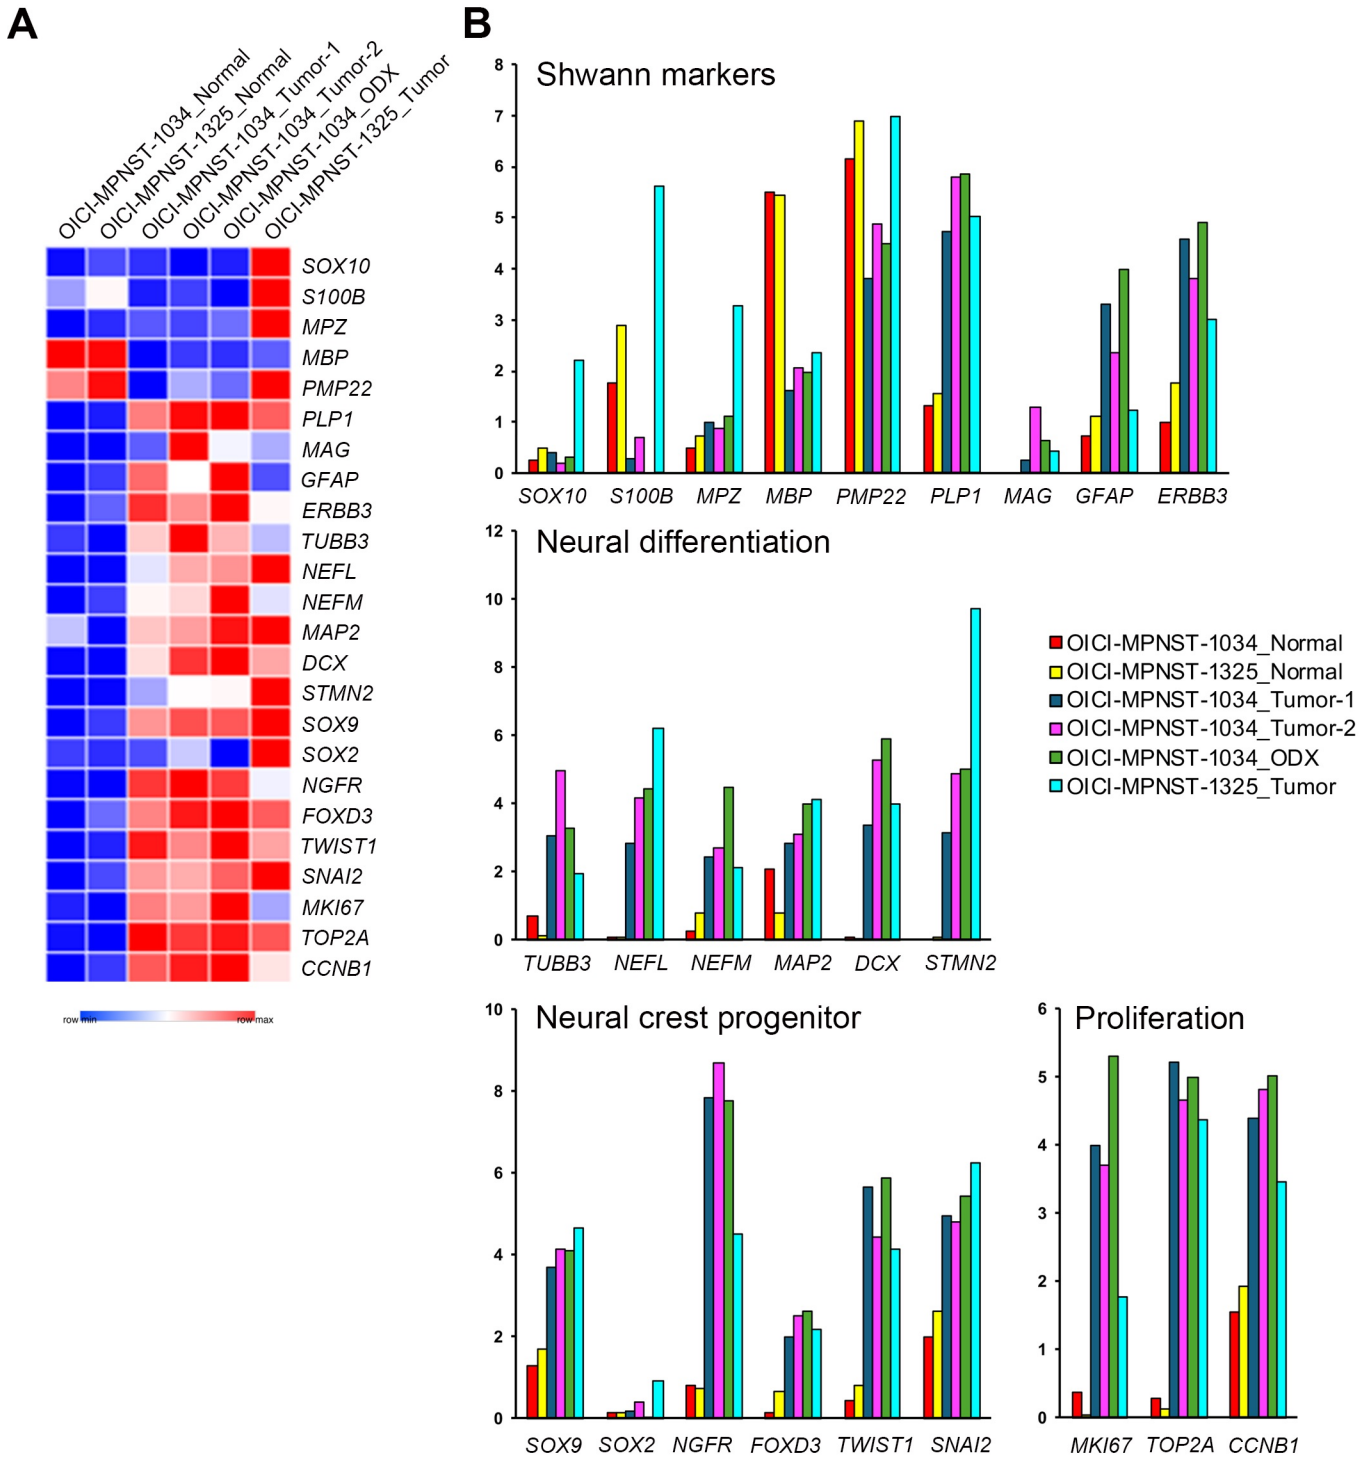

Supplement: Supplementary file 1 [file 81d6d15a06e0ac2032ae6cd1.pdf]
